# Supplementary material for: Isatin-based benzyloxybenzene derivatives as monoamine oxidase inhibitors with neuroprotective effect targeting neurogenerative disease treatment
Source: Royal Society of Chemistry journal article supplement (doi:10.1039/d3ra07035b), 2023-01-01
Supplement: d3ra07035b1.pdf [file d3ra07035b1.pdf]

## Supplementary Information

### Isatin-Based Benzyloxybenzene Derivatives as Monoamine Oxidase Inhibitors with Neuroprotective Effect Targeting Neurodegenerative Disease Treatment

Feba Benny,<sup>#a</sup> Jong Min Oh,<sup>#b</sup> Sunil Kumar,<sup>a</sup> Mohamed A. Abdelgawad,<sup>c</sup> Mohammed M. Ghoneim,<sup>d</sup> Mohamed Sadek Abdel-Bakky,<sup>e</sup> Neelima Kukerti,<sup>f</sup> Jobin Jose,<sup>g</sup> Hoon Kim,<sup>\*b</sup> Bijo Mathew,<sup>\*a</sup>

<sup>a</sup> Department of Pharmaceutical Chemistry, Amrita School of Pharmacy, Amrita Vishwa Vidyapeetham, AIMS Health Sciences Campus, Kochi, 682 041, India; febacbenny@gmail.com (F.B.); solankimedchem@gmail.com (S.K.); bijovilaventgu@gmail.com (B.M.)

<sup>b</sup> Department of Pharmacy, and Research Institute of Life Pharmaceutical Sciences, Sunchon National University, Suncheon 57922, Republic of Korea; ddazzo005@naver.com (J.M.O.); hoon@sunchon.ac.kr (H.K.)

<sup>c</sup> Department of Pharmaceutical chemistry, College of pharmacy, Jouf University, Sakaka 72341, Saudi Arabia; mhmdgwd@ju.edu.sa (M.A.A.)

<sup>d</sup> Department of Pharmacy Practice, College of Pharmacy, AlMaarefa University, Ad Diriyah 13713, Saudi Arabia; mghoneim@mcst.edu.sa (M.M.G.)

<sup>e</sup> Department of Pharmacology and Toxicology, College of Pharmacy, Qassim University, Buraydah 51452, Saudi Arabia; abdelbakkym@yahoo.com (M.S.A.)

<sup>f</sup> School of Pharmacy, Graphic Era Hill University, Dehradun, Uttarakhand 248002, India; nkukreti@gehu.ac.in (N.K.)

<sup>g</sup> Department of Pharmaceutics, NGSM Institute of Pharmaceutical Science, NITTE University, Mangalore, Karnataka 575018, India; jjmattam07@gmail.com (J.J.)

<sup>#</sup> Authors contributed equally to this work.

\* Correspondence: bijomathew@aims.amrita.edu or bijovilaventgu@gmail.com (B. M.); hoon@sunchon.ac.kr (H. K.)

## Contents

|                                        |     |
|----------------------------------------|-----|
| <b>Figure S1.</b> ISB1 structure ..... | S5  |
| 1.1 TLC of ISB1                        |     |
| 1.2. HPLC of ISB1                      |     |
| 1.3. <sup>1</sup> H-NMR of ISB1        |     |
| 1.4. <sup>13</sup> C-NMR of ISB1       |     |
| 1.5. Mass of ISB1                      |     |
| 1.6. Spectral interpretation of ISB1   |     |
| <b>Figure S2.</b> ISB2 structure ..... | S8  |
| 2.1 TLC of ISB2                        |     |
| 2.2. HPLC of ISB2                      |     |
| 2.3. <sup>1</sup> H-NMR of ISB2        |     |
| 2.4. <sup>13</sup> C-NMR of ISB2       |     |
| 2.5. Mass of ISB2                      |     |
| 2.6. Spectral interpretation of ISB2   |     |
| <b>Figure S3.</b> ISB3 structure ..... | S11 |
| 3.1 TLC of ISB3                        |     |
| 3.2. HPLC of ISB3                      |     |
| 3.3. <sup>1</sup> H-NMR of ISB3        |     |
| 3.4. <sup>13</sup> C-NMR of ISB3       |     |
| 3.5. Mass of ISB3                      |     |
| 3.6. Spectral interpretation of ISB3   |     |
| <b>Figure S4.</b> ISB4 structure ..... | S14 |
| 4.1 TLC of ISB4                        |     |
| 4.2. HPLC of ISB4                      |     |
| 4.3. <sup>1</sup> H-NMR of ISB4        |     |
| 4.4. <sup>13</sup> C-NMR of ISB4       |     |
| 4.5. Mass of ISB4                      |     |
| 4.6. Spectral interpretation of ISB4   |     |
| <b>Figure S5.</b> ISB5 structure ..... | S17 |
| 5.1 TLC of ISB5                        |     |
| 5.2. HPLC of ISB5                      |     |
| 5.3. <sup>1</sup> H-NMR of ISB5        |     |
| 5.4. <sup>13</sup> C-NMR of ISB5       |     |
| 5.5. Mass of ISB5                      |     |
| 5.6. Spectral interpretation of ISB5   |     |
| <b>Figure S6.</b> ISB6 structure ..... | S20 |
| 6.1 TLC of ISB6                        |     |
| 6.2. HPLC of ISB6                      |     |
| 6.3. <sup>1</sup> H-NMR of ISB6        |     |
| 6.4. <sup>13</sup> C-NMR of ISB6       |     |
| 6.5. Mass of ISB6                      |     |
| 6.6. Spectral interpretation of ISB6   |     |

|                                          |     |
|------------------------------------------|-----|
| <b>Figure S7.</b> ISFB1 structure .....  | S23 |
| 7.1 TLC of ISFB1                         |     |
| 7.2. HPLC of ISFB1                       |     |
| 7.3. <sup>1</sup> H-NMR of ISFB1         |     |
| 7.4. <sup>13</sup> C-NMR of ISFB1        |     |
| 7.5. Mass of ISFB1                       |     |
| 7.6. Spectral interpretation of ISFB1    |     |
| <b>Figure S8.</b> ISFB2 structure .....  | S26 |
| 8.1 TLC of ISFB2                         |     |
| 8.2. HPLC of ISFB2                       |     |
| 8.3. <sup>1</sup> H-NMR of ISFB2         |     |
| 8.4. <sup>13</sup> C-NMR of ISFB2        |     |
| 8.5. Mass of ISFB2                       |     |
| 8.6. Spectral interpretation of ISFB2    |     |
| <b>Figure S9.</b> ISFB3 structure .....  | S29 |
| 9.1 TLC of ISFB3                         |     |
| 9.2. HPLC of ISFB3                       |     |
| 9.3. <sup>1</sup> H-NMR of ISFB3         |     |
| 9.4. <sup>13</sup> C-NMR of ISFB3        |     |
| 9.5. Mass of ISFB3                       |     |
| 9.6. Spectral interpretation of ISFB3    |     |
| <b>Figure S10.</b> ISFB4 structure ..... | S32 |
| 10.1 TLC of ISFB4                        |     |
| 10.2. HPLC of ISFB4                      |     |
| 10.3. <sup>1</sup> H-NMR of ISFB4        |     |
| 10.4. <sup>13</sup> C-NMR of ISFB4       |     |
| 10.5. Mass of ISFB4                      |     |
| 10.6. Spectral interpretation of ISFB4   |     |
| <b>Figure S11.</b> ISFB5 structure ..... | S35 |
| 11.1 TLC of ISFB5                        |     |
| 11.2. HPLC of ISFB5                      |     |
| 11.3. <sup>1</sup> H-NMR of ISFB5        |     |
| 11.4. <sup>13</sup> C-NMR of ISFB5       |     |
| 11.5. Mass of ISFB5                      |     |
| 11.6. Spectral interpretation of ISFB5   |     |
| <b>Figure S12.</b> ISFB6 structure ..... | S38 |
| 12.1 TLC of ISFB6                        |     |
| 12.2. HPLC of ISFB6                      |     |
| 12.3. <sup>1</sup> H-NMR of ISFB6        |     |
| 12.4. <sup>13</sup> C-NMR of ISFB6       |     |
| 12.5. Mass of ISFB6                      |     |
| 12.6. Spectral interpretation of ISFB6   |     |
| <b>Figure S13.</b> ISBB1 structure ..... | S41 |
| 13.1 TLC of ISBB1                        |     |

|                                          |     |
|------------------------------------------|-----|
| 13.2. HPLC of ISBB1                      |     |
| 13.3. <sup>1</sup> H-NMR of ISBB1        |     |
| 13.4. <sup>13</sup> C-NMR of ISBB1       |     |
| 13.5. Mass of ISBB1                      |     |
| 13.6. Spectral interpretation of ISBB1   |     |
| <b>Figure S14. ISBB2 structure</b> ..... | S44 |
| 14.1 TLC of ISBB2                        |     |
| 14.2. HPLC of ISBB2                      |     |
| 14.3. <sup>1</sup> H-NMR of ISBB2        |     |
| 14.4. <sup>13</sup> C-NMR of ISBB2       |     |
| 14.5. Mass of ISBB2                      |     |
| 14.6. Spectral interpretation of ISBB2   |     |
| <b>Figure S15. ISBB3 structure</b> ..... | S47 |
| 15.1 TLC of ISBB3                        |     |
| 15.2. HPLC of ISBB3                      |     |
| 15.3. <sup>1</sup> H-NMR of ISBB3        |     |
| 15.4. <sup>13</sup> C-NMR of ISBB3       |     |
| 15.5. Mass of ISBB3                      |     |
| 15.6. Spectral interpretation of ISBB3   |     |
| <b>Figure S16. ISBB4 structure</b> ..... | S50 |
| 16.1 TLC of ISBB4                        |     |
| 16.2. HPLC of ISBB4                      |     |
| 16.3. <sup>1</sup> H-NMR of ISBB4        |     |
| 16.4. <sup>13</sup> C-NMR of ISBB4       |     |
| 16.5. Mass of ISBB4                      |     |
| 16.6. Spectral interpretation of ISBB4   |     |
| <b>Figure S17. ISBB5 structure</b> ..... | S53 |
| 17.1 TLC of ISBB5                        |     |
| 17.2. HPLC of ISBB5                      |     |
| 17.3. <sup>1</sup> H-NMR of ISBB5        |     |
| 17.4. <sup>13</sup> C-NMR of ISBB5       |     |
| 17.5. Mass of ISBB5                      |     |
| 17.6. Spectral interpretation of ISBB5   |     |
| <b>Figure S18. ISBB6 structure</b> ..... | S56 |
| 18.1 TLC of ISBB6                        |     |
| 18.2. HPLC of ISBB6                      |     |
| 18.3. <sup>1</sup> H-NMR of ISBB6        |     |
| 18.4. <sup>13</sup> C-NMR of ISBB6       |     |
| 18.5. Mass of ISBB6                      |     |
| 18.6. Spectral interpretation of ISBB6   |     |

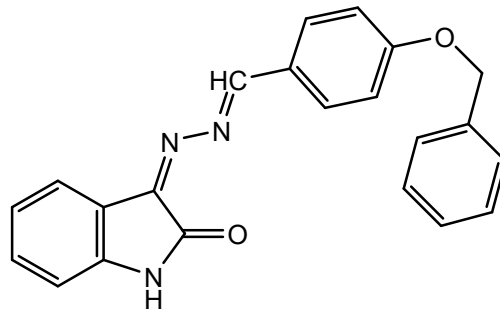

Figure S1. ISB1 structure

1.1 TLC OF ISB-1. Mobile phase is Hexane: ethyl acetate (70:30)

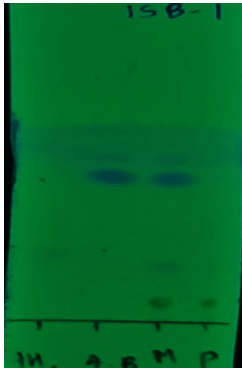

1.2 HPLC OF ISB-1

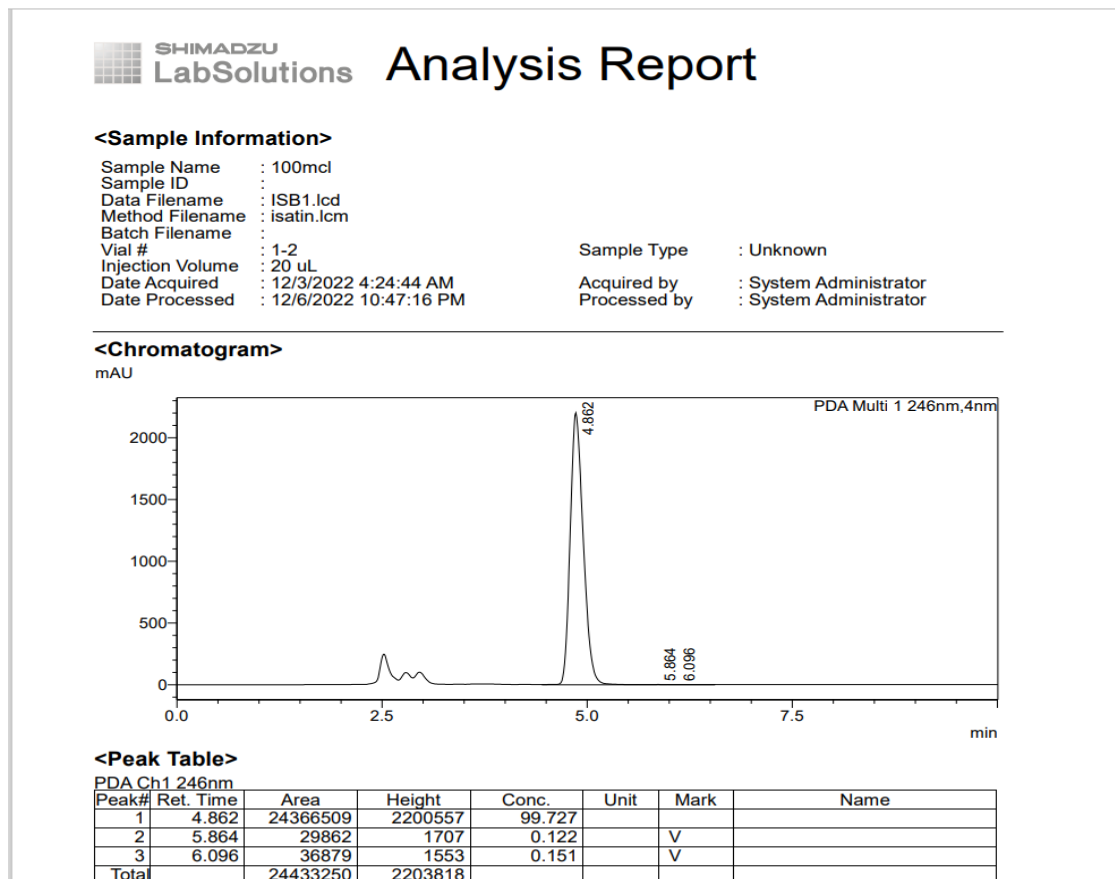

### 1.3 $^1\text{H}$ NMR SPECTRA OF ISB-1

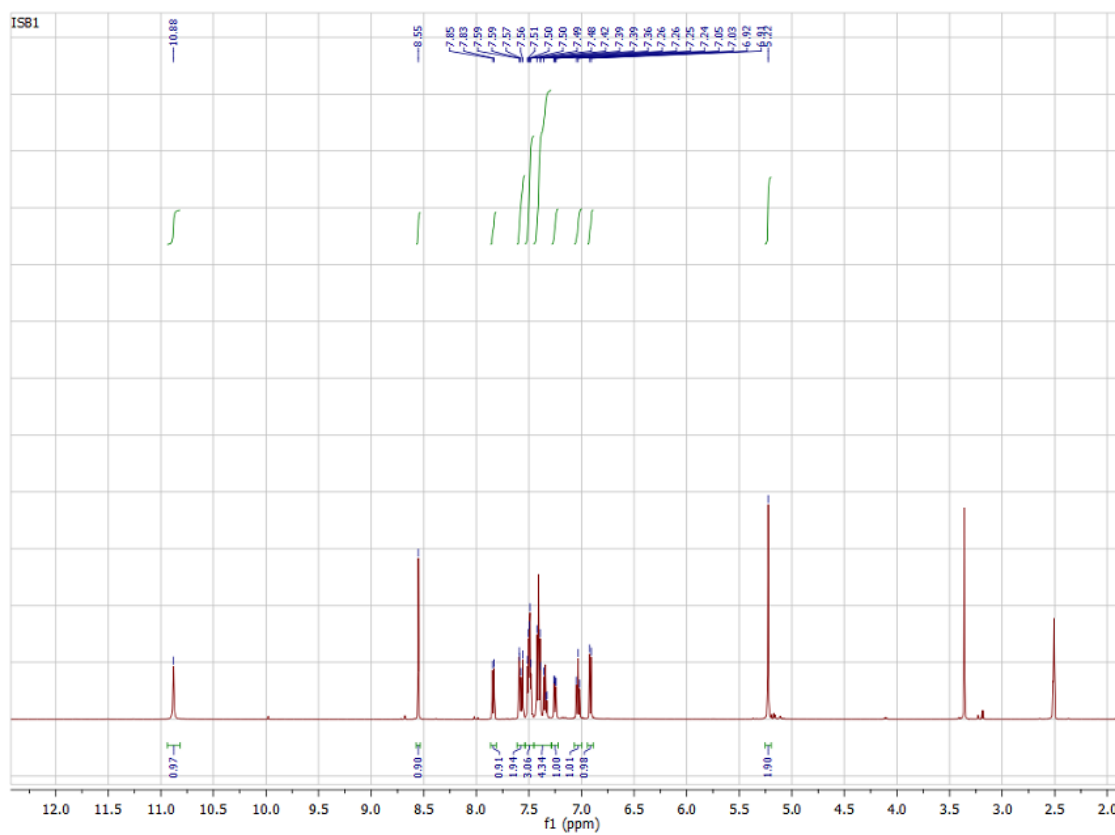

### 1.4 $^{13}\text{C}$ NMR SPECTRA OF ISB-1:

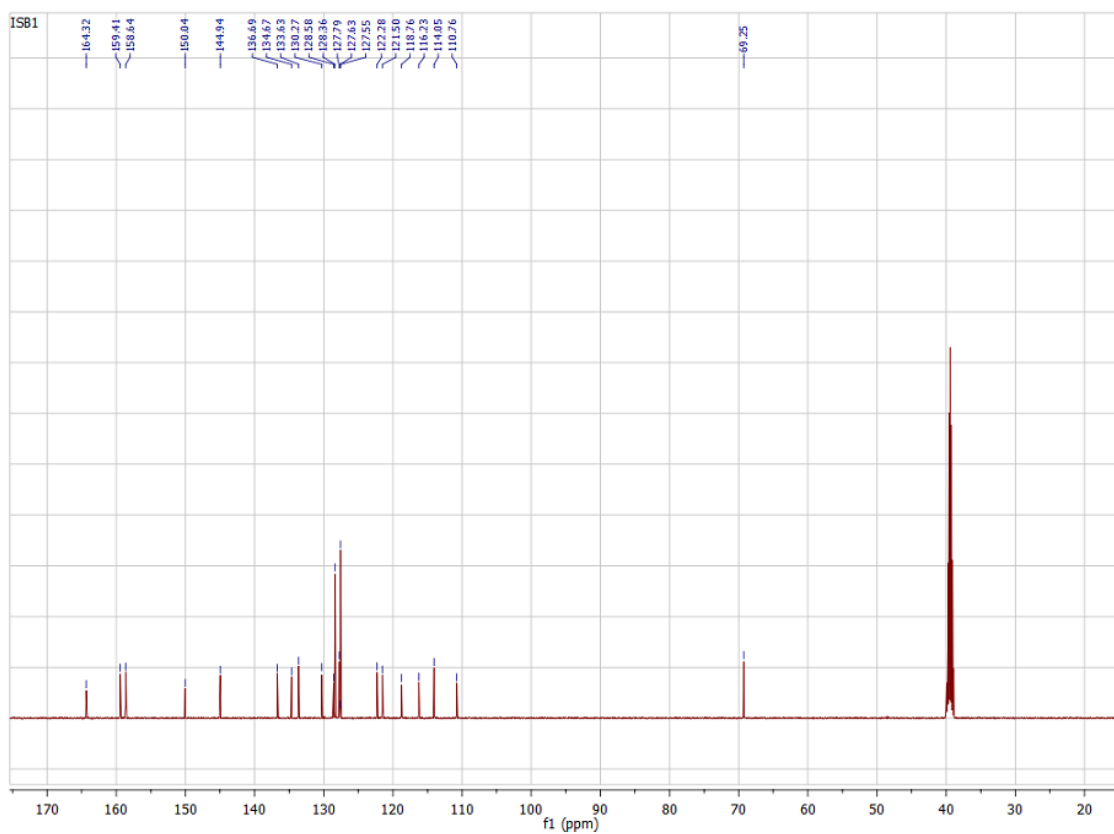

## 1.5 MASS SPECTRA OF ISB-1

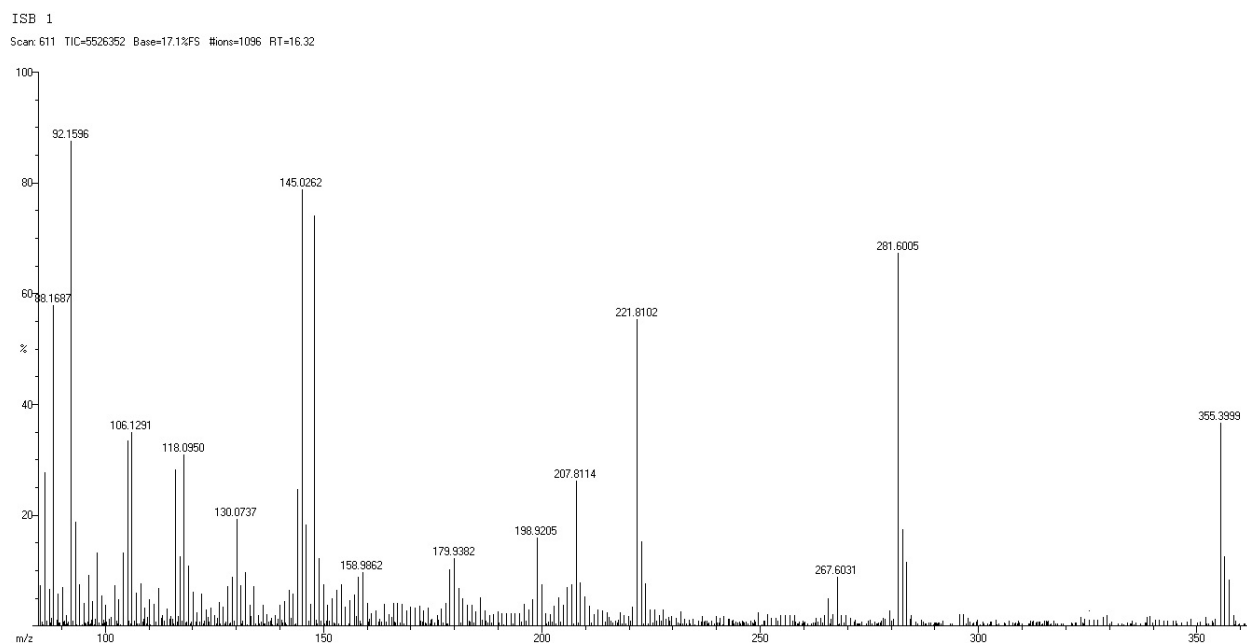

## 1.6 SPECTRAL INTERPRETATION:

*3-((4-(benzyloxy)benzylidene)hydrazineylidene)indolin-2-one (ISB1)*: Orange, solid, 68%, melting point.  $181 \pm 2^\circ\text{C}$ .  $^1\text{H NMR}$  (500 MHz, DMSO- $d_6$ )  $\delta$ : 10.85 (s, 1H, NH), 8.55 (s, 1H, =CH-), 7.84-6.92 (m, 13H, ArH), 5.22 (s, 2H, -CH $_2$ -).  $^{13}\text{C NMR}$  (500 MHz, DMSO- $d_6$ ) 164.32,

159.41, 158.64, 150.04, 144.94, 136.69, 134.67, 133.63, 130.27, 128.58, 128.36, 127.67, 122.28, 121.50, 118.76, 116.23, 114.05, 110.76, 69.25. Chemical Formula  $C_{22}H_{16}FN_3O_2$ . EI- HRMS (m/z): Calculated-355.3892, Observed-355.3999.

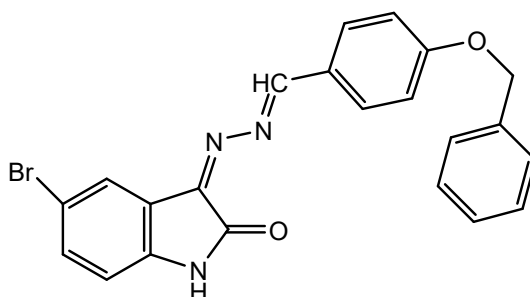

**Figure S2.** ISB-2 structure

2.1 TLC OF ISB-2: Mobile phase is Hexane: ethyl acetate (70:30)

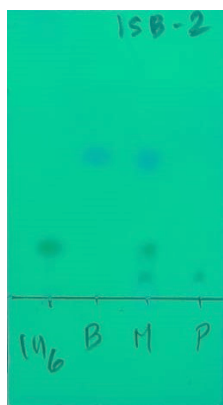



## 2.2 HPLC OF ISB-2

# SHIMADZU LabSolutions Analysis Report

### <Sample Information>

Sample Name : 100mcl  
 Sample ID :  
 Data Filename : ISB2.lcd  
 Method Filename : isatin.lcm  
 Batch Filename :  
 Vial # : 1-2  
 Injection Volume : 20 uL  
 Date Acquired : 12/2/2022 11:53:51 PM  
 Date Processed : 12/6/2022 10:49:04 PM  
 Sample Type : Unknown  
 Acquired by : System Administrator  
 Processed by : System Administrator

### <Chromatogram>

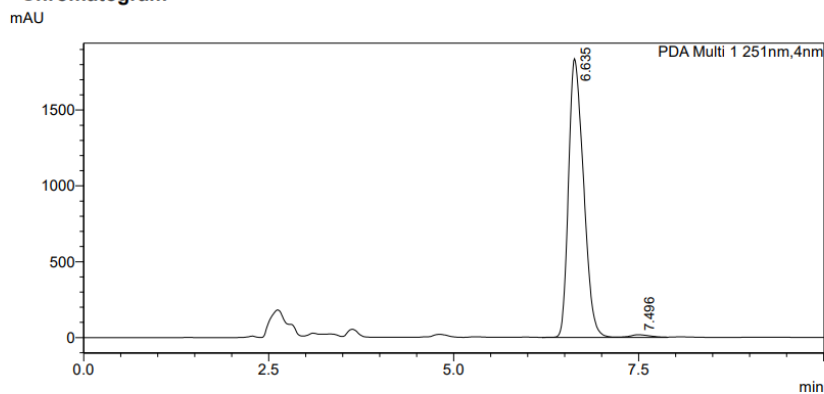

### <Peak Table>

PDA Ch1 251nm

| Peak# | Ret. Time | Area     | Height  | Conc.  | Unit | Mark |
|-------|-----------|----------|---------|--------|------|------|
| 1     | 6.635     | 25988432 | 1838015 | 98.604 |      | M    |
| 2     | 7.496     | 367998   | 17950   | 1.396  |      | V M  |
| Total |           | 26356429 | 1855965 |        |      |      |

## 2.3 <sup>1</sup>H NMR OF ISB-2

ISB-2

<sup>1</sup>H\_8scan DMSO {D:\Spectra} nmr 5

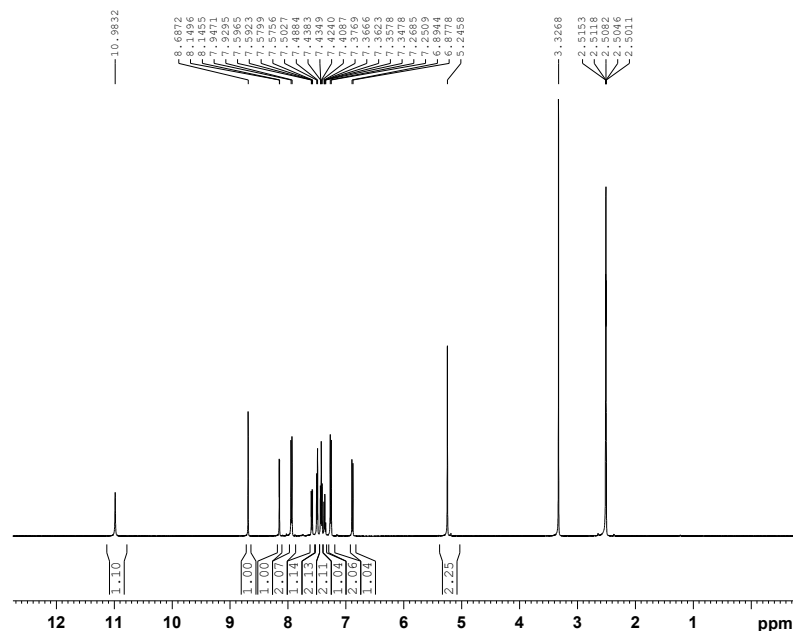

BRUKER  
 AVANCE NEO  
 500 MHz NMR  
 SPECTROMETER  
 SAIF, P.U.

Current Data Parameters  
 NAME Nov23-2022  
 EXPNO 50  
 PROCNO 1  
 F2 - Acquisition Parameters  
 Date 20221123  
 Time 10.19 h  
 INSTRUM Avance Neo 500  
 PROBHD z119470\_0333 (1  
 PULPROG zg30  
 TD 65536  
 SOLVENT DMSO  
 NS 16  
 DS 0  
 SWH 14705.883 Hz  
 FIDRES 0.448788 Hz  
 AQ 2.2282240 sec  
 RG 101  
 DW 34.000 usec  
 DE 6.79 usec  
 TE 300.2 K  
 D1 1.00000000 sec  
 TD0 1  
 SFO1 500.1730885 MHz  
 NUC1 1H  
 FO 3.33 usec  
 P1 10.00 usec  
 PLW1 20.93000031 W  
 F2 - Processing parameters  
 SI 65536  
 SF 500.1700000 MHz  
 WDW EM  
 SB 0  
 LB 0.30 Hz  
 GB 0  
 PC 1.00

## 2.4 <sup>13</sup>C NMR OF ISB-2

ISB-2  
C13CPD DMSO {D:\Spectra} nmr 5

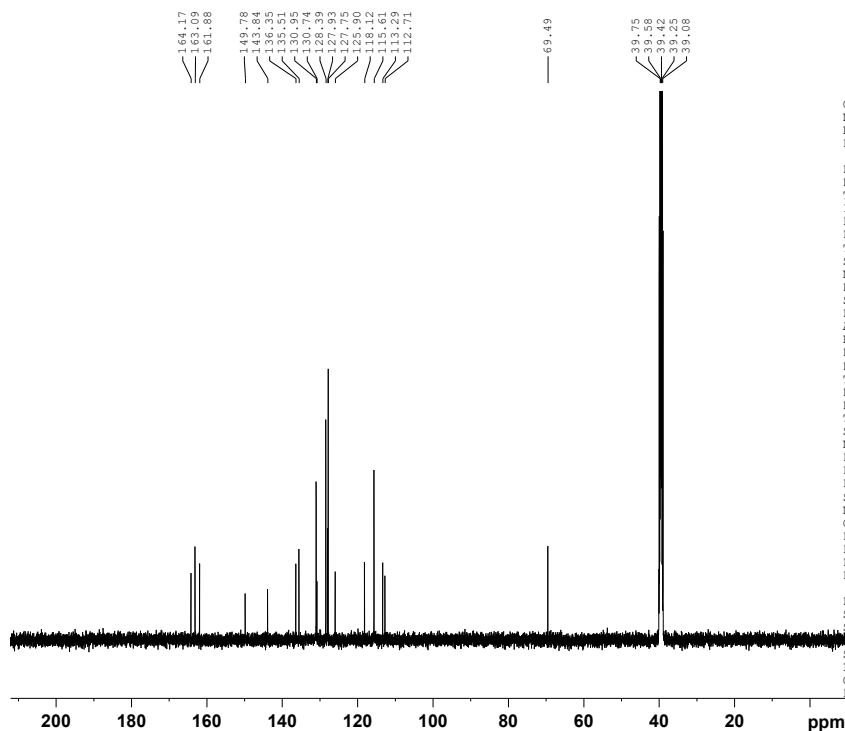

BRUKER  
AVANCE NEO  
500 MHz NMR SPECTROMETER  
SAIF, PANJAB UNIVERSITY,  
CHANDIGARH

Current Data Parameters  
NAME Nov23-2022  
EXPNO 51  
PROCNO 1

F2 - Acquisition Parameters  
Date 20221123  
Time 12.06 h  
INSTRUM Avance Neo 500  
PROBHD Z119470\_0333 ( (   
PULPROG zgpg30  
TD 65536  
SOLVENT DMSO  
NS 512  
DS 4  
SWH 37037.035 Hz  
FIDRES 1.130281 Hz  
AQ 0.8847360 sec  
RG 101  
DW 13.500 usec  
DE 6.50 usec  
TE 300.1 K  
D1 2.0000000 sec  
D11 0.0300000 sec  
TD0 1  
SFO1 125.7804233 MHz  
NUC1 13C  
P0 3.33 usec  
P1 10.00 usec  
PLW1 83.14099884 W  
SFO2 500.1720007 MHz  
NUC2 1H  
CPDPRG[2] waltz65  
PCPD2 80.00 usec  
PLW2 20.93000031 W  
PLW12 0.32703000 W  
PLW13 0.16449000 W

F2 - Processing parameters  
SI 32768  
SF 125.7679215 MHz  
WDW EM  
SSB 0  
LB 1.00 Hz  
GB 0  
PC 1.40

## 2.5 MASS SPECTRUM OF ISB-2

ISB-2

Scan: 706 TIC=6759696 Base=18.8%FS #Ions=1016 RT=18.7

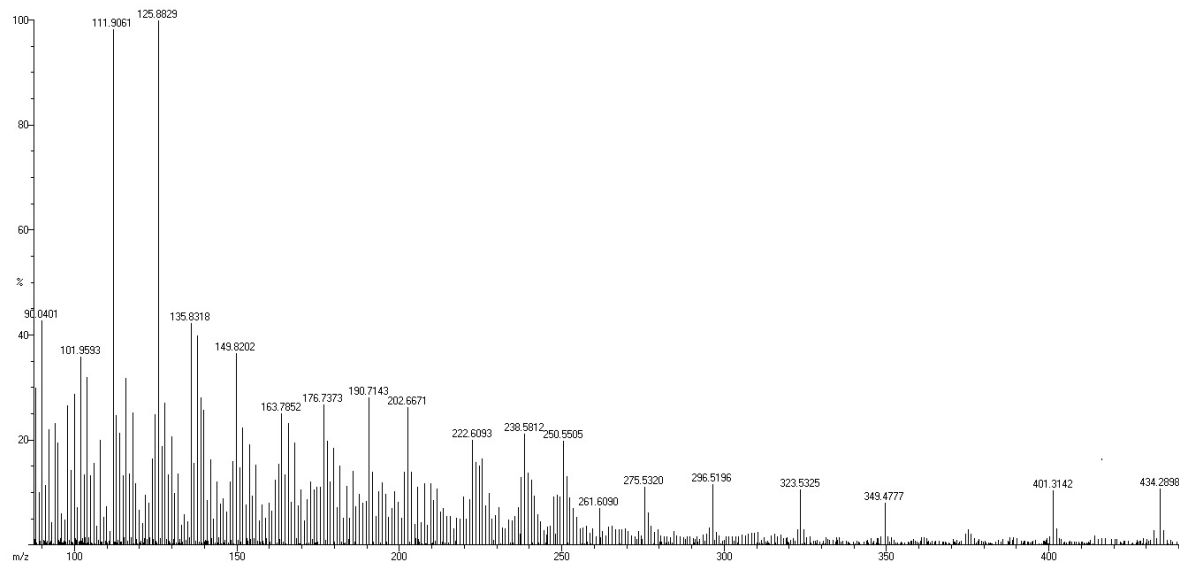

## 2.6 SPECTRAL INTERPRETATION:

3-((4-(benzyloxy)benzylidene)hydrazineylidene)-5-bromoindolin-2-one (**ISB2**): Orange, solid, 81%, melting point.  $244 \pm 2^\circ\text{C}$ .  $^1\text{H}$  NMR (500 MHz, DMSO- $d_6$ )  $\delta$ : 10.98 (s, 1H, NH), 8.68 (s, 1H, =CH-), 8.14-6.87 (m, 12H, ArH), 5.24 (s, 2H, -CH $_2$ -)  $^{13}\text{C}$  NMR (500 MHz, DMSO- $d_6$ ) 164.17, 163.09, 161.88, 149.78, 143.84, 136.35, 135.51, 130.95, 130.74, 128.39, 127.93, 127.75, 125.90, 118.12, 115.61, 113.29, 112.71, 69.49. Chemical formula  $\text{C}_{22}\text{H}_{15}\text{BrFN}_3\text{O}$  EI-HRMS (m/z): Calculated- 434.2898, Observed-434.2853.

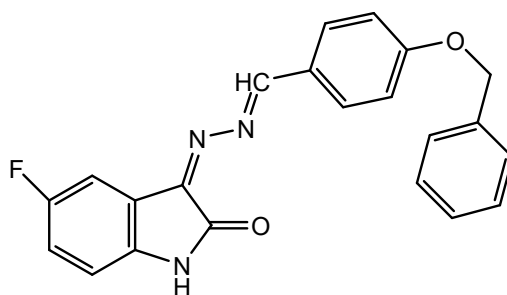

**Figure S3.** ISB3 structure

3.1 TLC OF ISB-3: Mobile phase is Hexane: ethyl acetate (70:30)

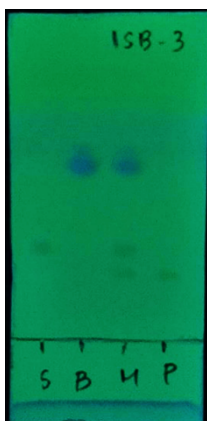

### 3.2 HPLC OF ISB-3

SHIMADZU LabSolutions Analysis Report

<Sample Information>

Sample Name : 100mcl  
 Sample ID :  
 Data Filename : ISB3.lcd  
 Method Filename : isatin.lcm  
 Batch Filename :  
 Vial # : 1-2  
 Injection Volume : 20 uL  
 Date Acquired : 12/3/2022 1:01:23 AM  
 Date Processed : 12/3/2022 4:32:06 AM  
 Sample Type : Unknown  
 Acquired by : System Administrator  
 Processed by : System Administrator

<Chromatogram>

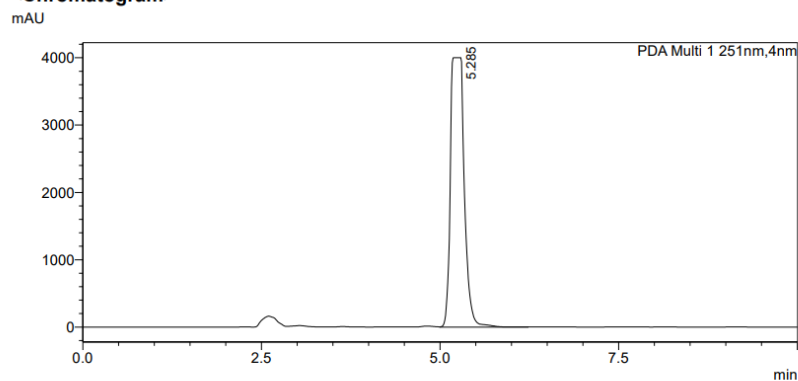

<Peak Table>

| Peak# | Ret. Time | Area     | Height  | Conc.   | Unit | Mark | Name |
|-------|-----------|----------|---------|---------|------|------|------|
| 1     | 5.285     | 53940216 | 3999748 | 100.000 |      |      |      |
| Total |           | 53940216 | 3999748 |         |      |      |      |

### 3.3 <sup>1</sup>H NMR OF ISB-3

ISB-3  
1H\_8scan DMSO {D:\Spectra} nmr 6

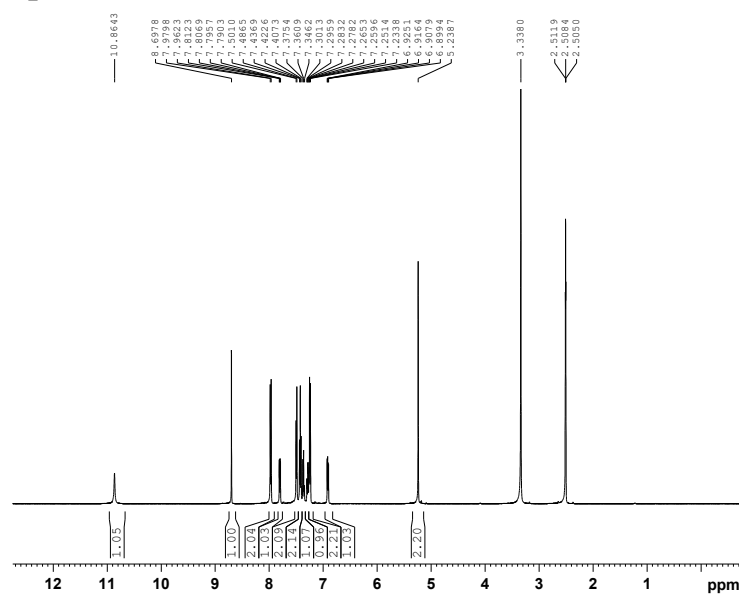

BRUKER  
AVANCE NEO  
500 MHz NMR  
SPECTROMETER  
SAIF, P.U.

Current Data Parameters  
NAME Nov23-2022  
EXPNO 60  
PROCNO 1

F2 - Acquisition Parameters  
Date\_ 20221123  
Time 10.22 h  
INSTRUM Avance Neo 500  
PROBHD 2119470\_0333 ( )  
PULPROG zg30  
TD 65536  
SOLVENT DMSO  
NS 16  
DS 0  
SWH 14705.883 Hz  
FIDRES 0.448788 Hz  
AQ 2.2282240 sec  
RG 101  
DW 34.000 usec  
DE 6.79 usec  
TE 300.2 K  
D1 1.00000000 sec  
TDO 1  
SFO1 500.1730885 MHz  
NUC1 1H  
P0 3.33 usec  
P1 10.00 usec  
PLW1 20.93000031 W

F2 - Processing parameters  
SI 65536  
SF 500.1700000 MHz  
WDW EM  
SSB 0  
LB 0.30 Hz  
GB 0  
PC 1.00

### 3.4 <sup>13</sup>C NMR OF ISB-3

ISB-3  
C13CPD DMSO {D:\Spectra} nmr 6

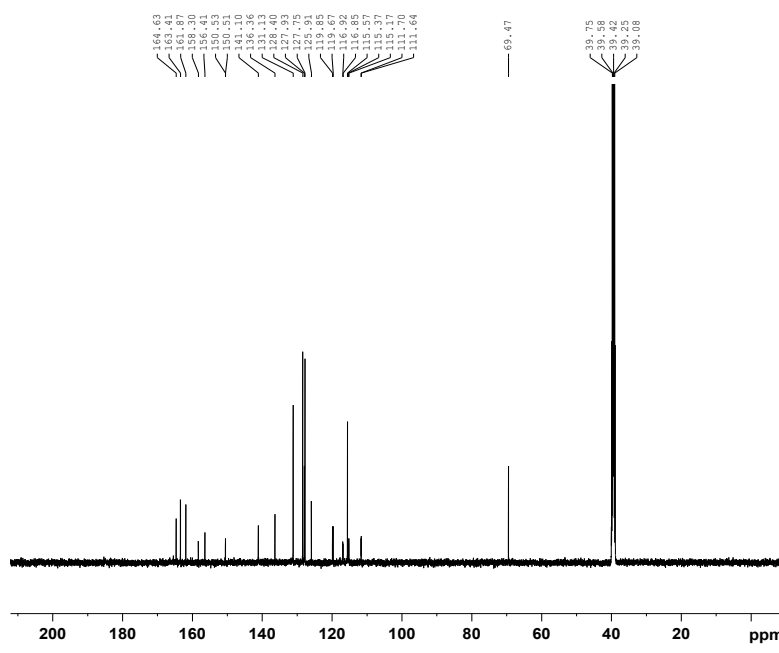

BRUKER  
AVANCE NEO  
500 MHz NMR SPECTROMETER  
SAIF, PANJAB UNIVERSITY,  
CHANDIGARH

Current Data Parameters  
NAME Nov23-2022  
EXPNO 61  
PROCNO 1

F2 - Acquisition Parameters  
Date\_ 20221123  
Time 12.33 h  
INSTRUM Avance Neo 500  
PROBHD 2119470\_0333 ( )  
PULPROG zgpg30  
TD 65536  
SOLVENT DMSO  
NS 512  
DS 4  
SWH 37037.035 Hz  
FIDRES 1.130281 Hz  
AQ 0.8847360 sec  
RG 101  
DW 13.500 usec  
DE 6.50 usec  
TE 300.2 K  
D1 2.00000000 sec  
D11 0.03000000 sec  
TDO 1  
SFO1 125.7804233 MHz  
NUC1 13C  
P0 3.33 usec  
P1 10.00 usec  
PLW1 83.14099884 W  
SFO2 500.1720007 MHz  
NUC2 1H  
CPDPRG2 waltz65  
PCPD2 80.00 usec  
PLW2 20.93000031 W  
PLW12 0.32703000 W  
PLW13 0.16449000 W

F2 - Processing parameters  
SI 32768  
SF 125.7679205 MHz  
WDW EM  
SSB 0  
LB 1.00 Hz  
GB 0  
PC 1.40

### 3.5 MASS SPECTRA OF ISB-3

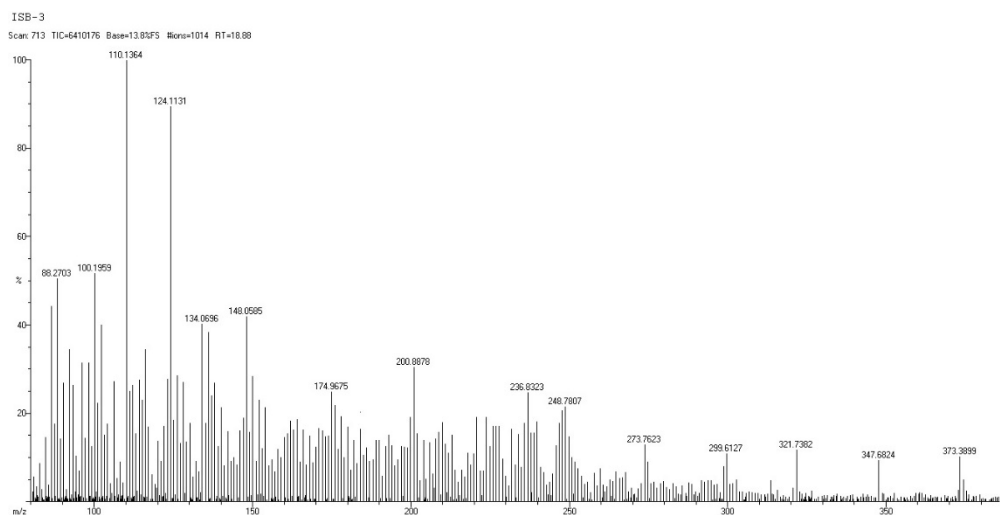

### 3.6 SPECTRAL INTERPRETATION:

*3-((4-(benzyloxy)benzylidene)hydrazineylidene)-5-fluoroindolin-2-one (ISB 3)*: Brick red , solid, 72%, melting point.  $229 \pm 2^\circ\text{C}$ .  $^1\text{H}$  NMR (500 MHz, DMSO- $d_6$ )  $\delta$ : 10.86 (s, 1H, NH), 8.69 (s, 1H, =CH-), 7.97-6.89 (m, 12H, ArH), 5.23 (s, 2H, -CH<sub>2</sub>-).  $^{13}\text{C}$  NMR (500 MHz, DMSO- $d_6$ ): 164.63, 163.41, 161.87, 158.30, 156.41, 150.53, 141.10, 136.36, 131.13, 128.40, 127.93, 126.91, 119.85, 116.92, 115.87, 111.70, 69.47. Chemical formula C<sub>22</sub>H<sub>15</sub>F<sub>2</sub>N<sub>3</sub>O<sub>2</sub> EI-HRMS (m/z): Calculated- 378.3899, Observed-373.3797.

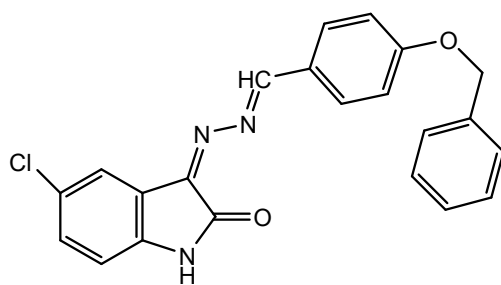

**Figure S4.** ISB4 structure

4.1 TLC OF ISB-4: Mobile phase is Hexane: ethyl acetate (70:30)

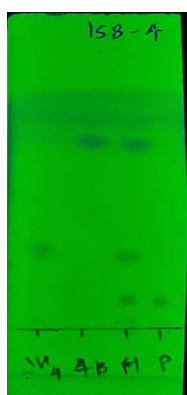

4.2 HPLC OF ISB-4

### <Sample Information>

Sample Name : 100mcl  
 Sample ID :  
 Data Filename : isb4.lcd  
 Method Filename : isatin.lcm  
 Batch Filename :  
 Vial # : 1-2  
 Injection Volume : 20 uL  
 Date Acquired : 12/7/2022 12:20:35 AM  
 Date Processed : 12/7/2022 12:37:05 AM  
 Sample Type : Unknown  
 Acquired by : System Administrator  
 Processed by : System Administrator

### <Chromatogram>

mAU

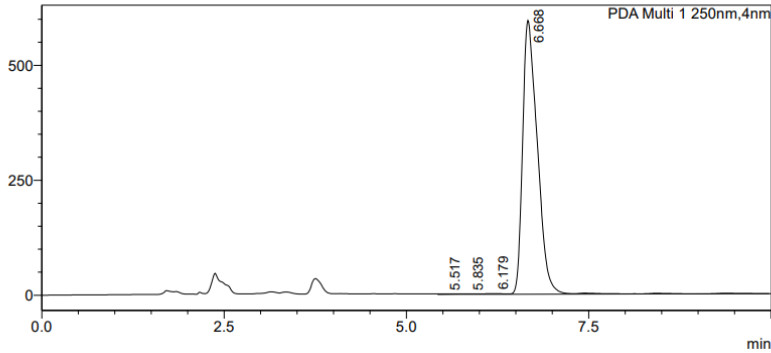

### <Peak Table>

PDA Ch1 250nm

| Peak# | Ret. Time | Area    | Height | Conc.  | Unit | Mark | Name |
|-------|-----------|---------|--------|--------|------|------|------|
| 1     | 5.517     | 17866   | 1076   | 0.210  |      |      |      |
| 2     | 5.835     | 15469   | 977    | 0.182  |      | V    |      |
| 3     | 6.179     | 28241   | 1507   | 0.332  |      | V    |      |
| 4     | 6.668     | 8435943 | 595104 | 99.275 |      | SV   |      |
| Total |           | 8497519 | 598663 |        |      |      |      |

## 4.3 <sup>1</sup>H NMR OF ISB-4

ISB-4

1H\_8scan DMSO {D:\Spectra} nmr 7

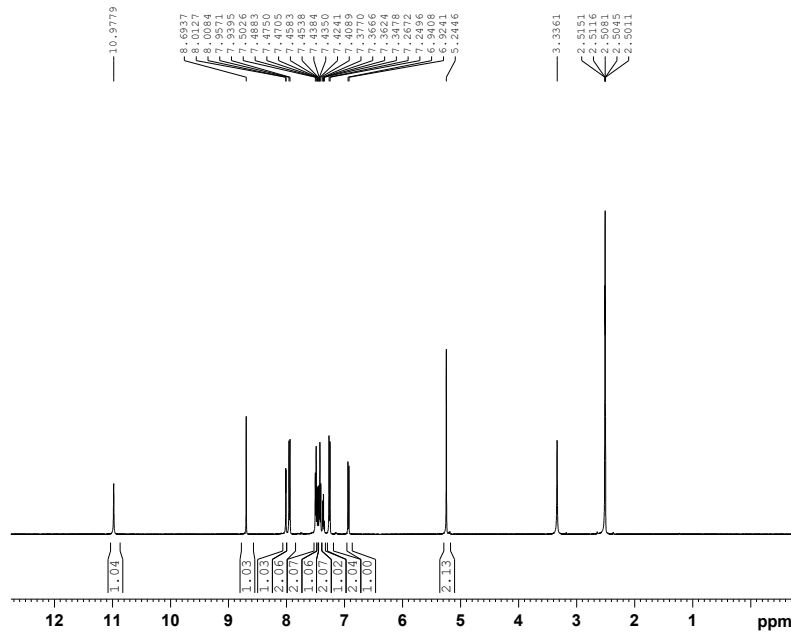

BRUKER  
 AVANCE NEO  
 500 MHz NMR  
 SPECTROMETER  
 SAIF, P.U.

Current Data Parameters  
 NAME Nov23-2022  
 EXPNO 70  
 PROCNO 1  
 F2 - Acquisition Parameters  
 Date 20221123  
 Time 10.24 h  
 INSTRUM Avance Neo 500  
 PROBRD z119470\_0333 ( )  
 PULPROG zg30  
 TD 65536  
 SOLVENT DMSO  
 NS 16  
 DS 0  
 SWH 14705.883 Hz  
 FIDRES 0.448788 Hz  
 AQ 2.2282240 sec  
 RG 101  
 DW 34.000 usec  
 DE 6.79 usec  
 TE 300.2 K  
 D1 1.0000000 sec  
 TD0 1  
 SFO1 500.1730885 MHz  
 NUC1 1H  
 P0 3.33 usec  
 P1 10.00 usec  
 PLW1 20.93000031 W  
 F2 - Processing parameters  
 SI 65536  
 SF 500.1700000 MHz  
 WDW EM  
 SSB 0  
 LB 0.30 Hz  
 GB 0  
 PC 1.00

## 4.4 <sup>13</sup>C NMR OF ISB-4



ISB-4  
 C13CPD DMSO {D:\Spectra} nmr 7

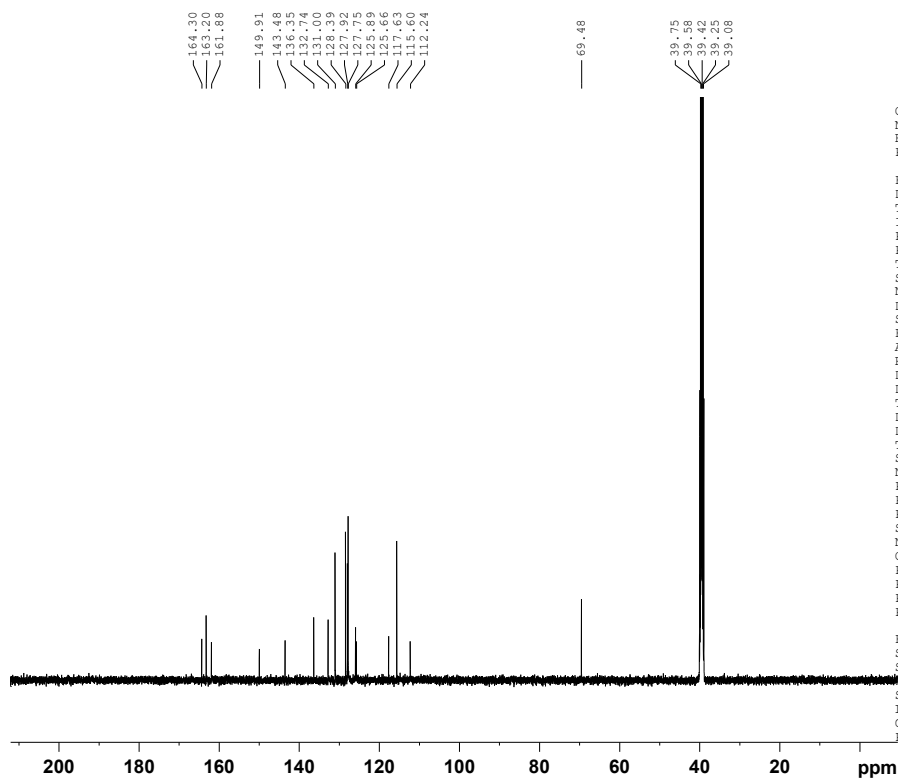

BRUKER  
 AVANCE NEO  
 500 MHz NMR SPECTROMETER  
 SAIF, PANJAB UNIVERSITY,  
 CHANDIGARH

Current Data Parameters  
 NAME Nov23-2022  
 EXPNO 71  
 PROCNO 1  
 F2 - Acquisition Parameters  
 Date\_ 20221123  
 Time\_ 13.00 h  
 INSTRUM Avance Neo 500  
 PROBHD Z119470\_0333 (  
 PULPROG zgpg30  
 TD 65536  
 SOLVENT DMSO  
 NS 512  
 DS 4  
 SWH 37037.035 Hz  
 FIDRES 1.130281 Hz  
 AQ 0.8847360 sec  
 RG 101  
 DW 13.500 usec  
 DE 6.50 usec  
 TE 300.2 K  
 D1 2.00000000 sec  
 D11 0.03000000 sec  
 TD0 1  
 SFO1 125.7804233 MHz  
 NUC1 13C  
 P0 3.33 usec  
 F1 10.00 usec  
 PLW1 83.14099884 W  
 SFO2 500.1720007 MHz  
 NUC2 1H  
 CPDPRG[2] waltz65  
 ECPD2 80.00 usec  
 PLW2 20.93000031 W  
 PLW12 0.32703000 W  
 PLW13 0.16449000 W  
 F2 - Processing parameters  
 SI 32768  
 SF 125.7679215 MHz  
 NDW EM  
 SSB 0  
 LB 1.00 Hz  
 GB 0  
 PC 1.40

### 4.5 MASS SPECTRA OF ISB-4

ISB 4  
 Scan: 701 TIC=7425776 Base=27.3%FS H ions=1023 RT=18.58

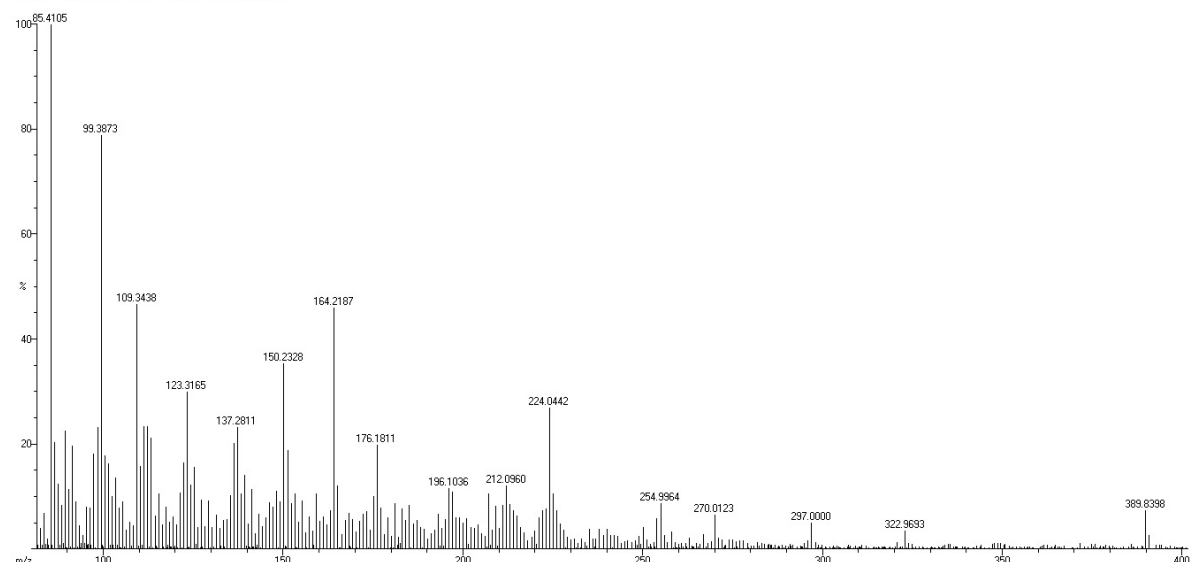

### 4.6 SPECTRAL INTERPRETATION:

3-((4-(benzyloxy)benzylidene)hydrazineylidene)-5-chloroindolin-2-one (**ISB 4**): Orange solid, 78%, melting point.  $240 \pm 2^\circ\text{C}$ .  $^1\text{H}$  NMR (500 MHz, DMSO- $d_6$ )  $\delta$ : 10.97 (s, 1H, NH), 8.69 (s, 1H, =CH-), 8.01-6.92 (m, 12H, ArH), 5.24 (s, 2H, -CH $_2$ -)  $^{13}\text{C}$  NMR (500 MHz, DMSO- $d_6$ ) 164.30, 163.88, 161.88, 149.91, 143.48, 136.35, 132.74, 131.00, 128.39, 127.92, 126.89, 125.66, 117.63, 116.60, 112.24, 69.48. Chemical Formula  $\text{C}_{22}\text{H}_{15}\text{ClFN}_3\text{O}_2$  EI- HRMS (m/z): Calculated-389.8398, Observed- 389.8343.

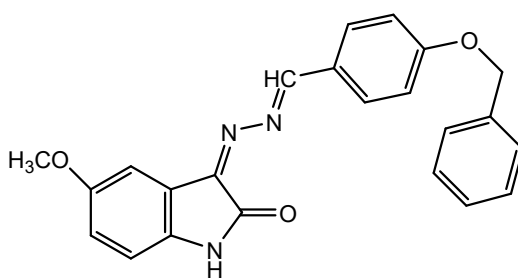

**Figure S5.** ISB5 structure

5.1 TLC OF ISB-5: Mobile phase is Hexane: ethyl acetate (70:30)

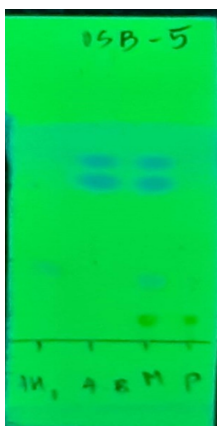

## 5.2 HPLC OF 15B-5

### SHIMADZU LabSolutions Analysis Report

#### <Sample Information>

Sample Name : 100mcl  
 Sample ID :  
 Data Filename : ISB-5 ORG NEW.lcd  
 Method Filename : isatin.lcm  
 Batch Filename :  
 Vial # : 1-2  
 Injection Volume : 20 uL  
 Date Acquired : 12/7/2022 12:46:47 AM  
 Date Processed : 12/7/2022 1:00:09 AM  
 Sample Type : Unknown  
 Acquired by : System Administrator  
 Processed by : System Administrator

#### <Chromatogram>

mAU

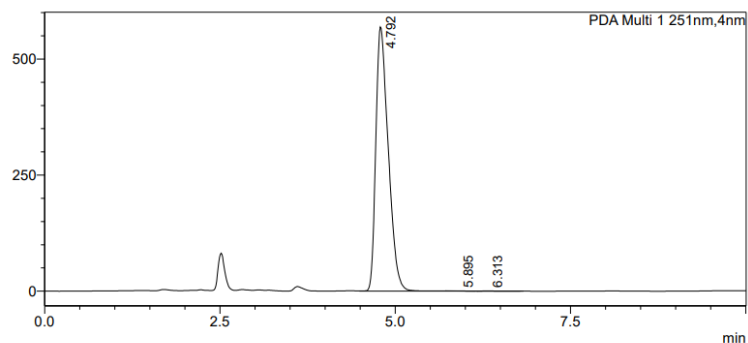

#### <Peak Table>

| PDA Ch1 251nm |           |         |        |        |      |      |      |
|---------------|-----------|---------|--------|--------|------|------|------|
| Peak#         | Ret. Time | Area    | Height | Conc.  | Unit | Mark | Name |
| 1             | 4.792     | 7049924 | 569118 | 99.894 |      | S    |      |
| 2             | 5.895     | 1977    | 181    | 0.028  |      | T    |      |
| 3             | 6.313     | 5518    | 338    | 0.078  |      | T    |      |
| Total         |           | 7057420 | 569636 |        |      |      |      |

## 5.3 <sup>1</sup>H NMR OF 15B-5

ISB-5  
1H\_8scan DMSO {D:\Spectra} nmr 8

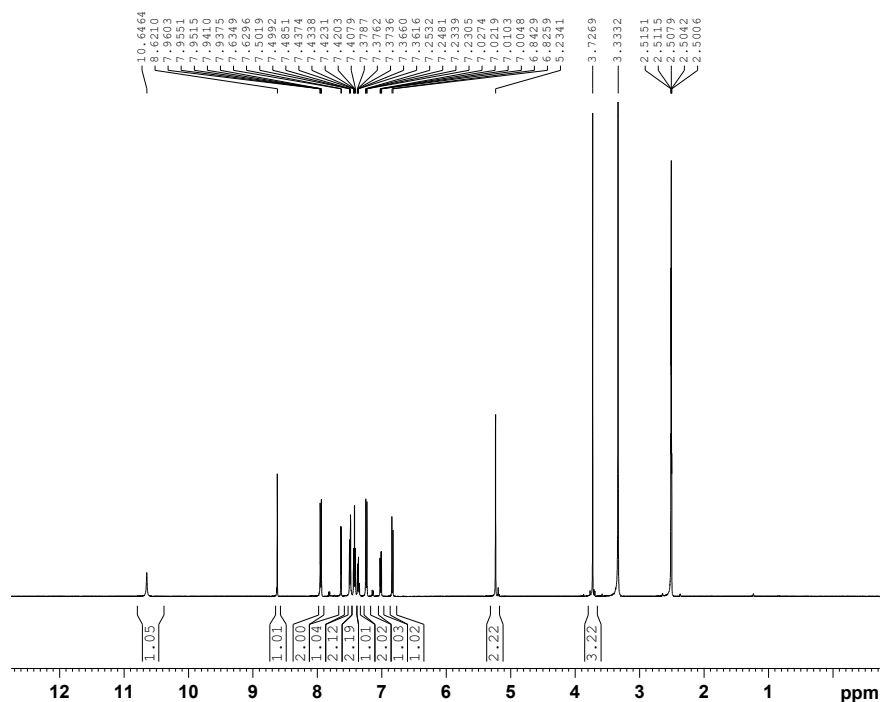

BRUKER  
AVANCE NEO  
500 MHz NMR  
SPECTROMETER  
SAIF, P.U.

Current Data Parameters  
NAME Nov23-2022  
EXPNO 81  
PROCNO 1

F2 - Acquisition Parameters  
Date\_ 20221123  
Time\_ 11.11 h  
INSTRUM Avance Neo 500  
PROBHD Z119470\_0333 ( )  
PULPROG zg30  
TD 65536  
SOLVENT DMSO  
NS 16  
DS 0  
SWH 14705.883 Hz  
FIDRES 0.448788 Hz  
AQ 2.2282240 sec  
RG 101  
DW 34.000 usec  
DE 6.79 usec  
TE 300.2 K  
D1 1.00000000 sec  
TD0 1  
SFO1 500.1730885 MHz  
NUC1 1H  
P0 3.33 usec  
P1 10.00 usec  
PLW1 20.93000031 W

F2 - Processing parameters  
SI 65536  
SF 500.1700000 MHz  
WDW EM  
SSB 0  
LB 0.30 Hz  
GB 0  
PC 1.00

### 5.4 <sup>13</sup>C NMR OF ISB-5

ISB-5  
C13CPD DMSO {D:\Spectra} nmr 8

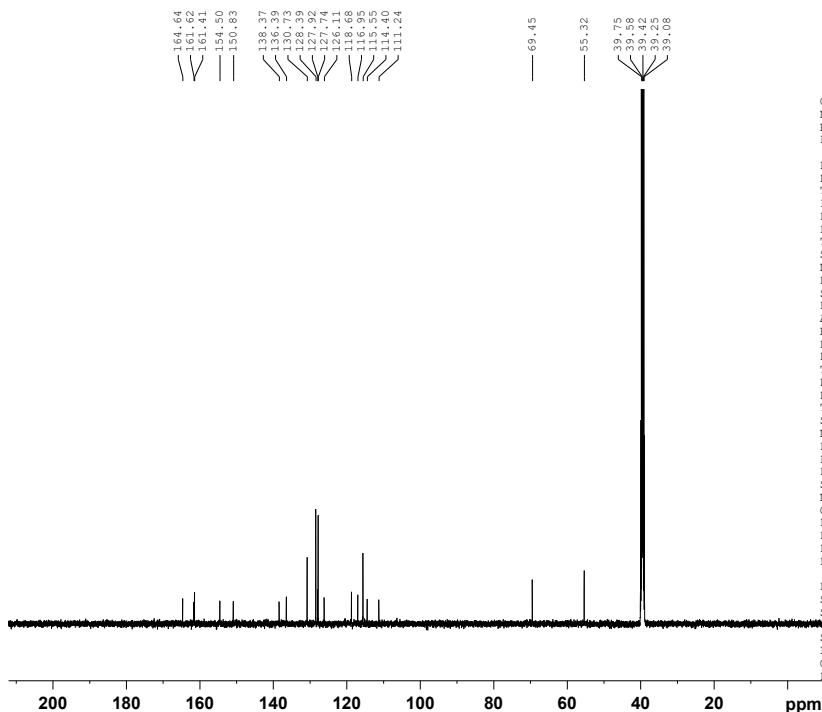

BRUKER  
AVANCE NEO  
500 MHz NMR SPECTROMETER  
SAIF, PANJAB UNIVERSITY,  
CHANDIGARH

Current Data Parameters  
NAME Nov23-2022  
EXPNO 82  
PROCNO 1

F2 - Acquisition Parameters  
Date\_ 20221123  
Time\_ 15.10 h  
INSTRUM Avance Neo 500  
PROBHD Z119470\_0333 ( )  
PULPROG zgpg30  
TD 65536  
SOLVENT DMSO  
NS 1024  
DS 4  
SWH 37037.035 Hz  
FIDRES 1.130281 Hz  
AQ 0.8847360 sec  
RG 101  
DW 13.500 usec  
DE 6.50 usec  
TE 300.1 K  
D1 2.00000000 sec  
D11 0.03000000 sec  
TD0 1  
SFO1 125.7804233 MHz  
NUC1 13C  
P0 3.33 usec  
P1 10.00 usec  
PLW1 83.14099884 W  
SFO2 500.1720007 MHz  
NUC2 1H  
CPDPRG[2] waltz65  
PCPD2 80.00 usec  
PLW2 20.93000031 W  
PLW12 0.32703000 W  
PLW13 0.16449000 W

F2 - Processing parameters  
SI 32768  
SF 125.7679202 MHz  
WDW EM  
SSB 0  
LB 1.00 Hz  
GB 0  
PC 1.40

### 5.5 MASS SPECTRA OF ISB-5

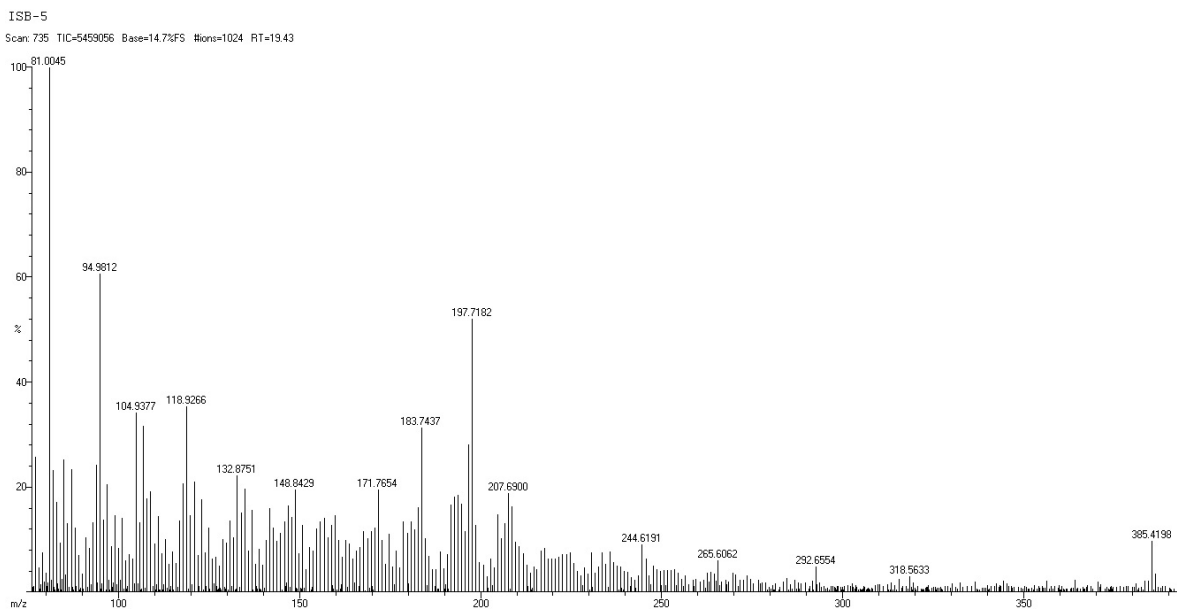

## 5.6 SPECTRAL INTERPRETATION

*3-((4-(benzyloxy)benzylidene)hydrazineylidene)-5-methoxyindolin-2-one (ISB5)*: Reddish brown, solid, 72%, melting point.  $192 \pm 2^\circ\text{C}$ .  $^1\text{H NMR}$  (500 MHz, DMSO- $d_6$ )  $\delta$ : 10.64 (s, 1H, NH), 8.62 (s, 1H, =CH-), 7.96-6.82(m, 12H, ArH), 5.23 (s, 2H, -CH<sub>2</sub>-), 3.72 (s, 3H, -CH<sub>2</sub>-Ar).  $^{13}\text{C NMR}$  (500 MHz, DMSO- $d_6$ ) 164.64, 161.62, 161.41, 154.50, 150.63, 138.37, 136.39, 130.73, 128.39, 127.92, 126.11, 118.68, 116.98, 115.55, 114.40, 111.28, 69.45, 55.32. Chemical formula C<sub>23</sub>H<sub>18</sub>FN<sub>3</sub>O<sub>3</sub> EI- HRMS (m/z): Calculated-385.4198, Observed- 385.4152.

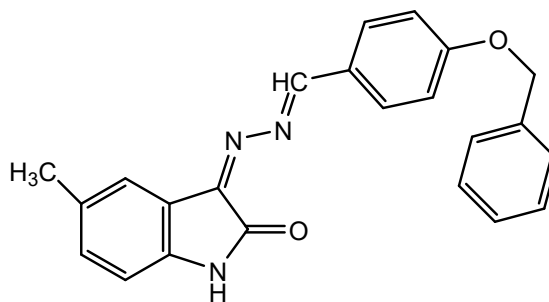

**Figure S6.** ISB6 structure

6.1 TLC OF ISB-6: Mobile phase is Hexane: ethyl acetate (70:30)

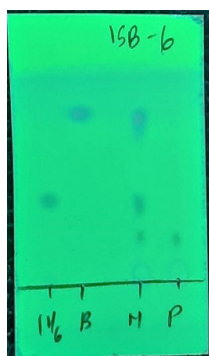

6.2 HPLC OF ISB-6

**SHIMADZU LabSolutions Analysis Report**

**<Sample Information>**

|                  |                         |              |                        |
|------------------|-------------------------|--------------|------------------------|
| Sample Name      | : 100mcl                | Sample Type  | : Unknown              |
| Sample ID        | :                       | Acquired by  | : System Administrator |
| Data Filename    | : ISB6.lcd              | Processed by | : System Administrator |
| Method Filename  | : isatin.lcm            |              |                        |
| Batch Filename   | :                       |              |                        |
| Vial #           | : 1-2                   |              |                        |
| Injection Volume | : 20 uL                 |              |                        |
| Date Acquired    | : 12/3/2022 4:11:05 AM  |              |                        |
| Date Processed   | : 12/6/2022 10:55:54 PM |              |                        |

**<Chromatogram>**

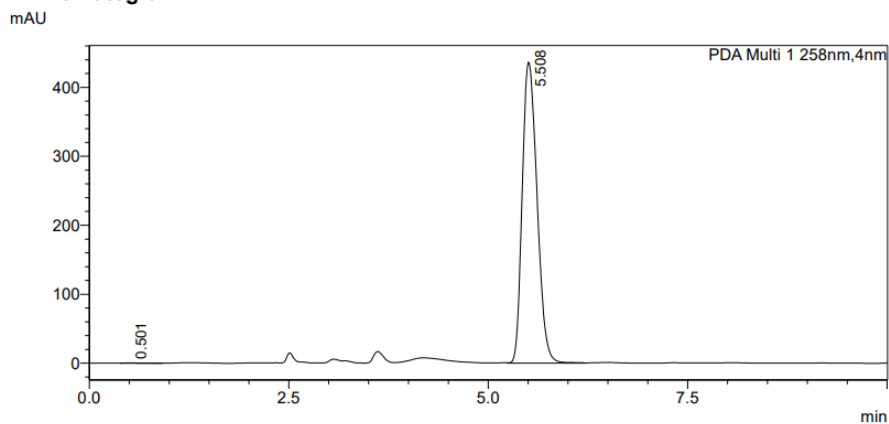

**<Peak Table>**

| Peak# | Ret. Time | Area    | Height | Conc.  | Unit | Mark | Name |
|-------|-----------|---------|--------|--------|------|------|------|
| 1     | 0.501     | 7008    | 324    | 0.124  |      |      |      |
| 2     | 5.508     | 5662652 | 436305 | 99.876 |      |      |      |
| Total |           | 5669660 | 436629 |        |      |      |      |

### 6.3 <sup>1</sup>H NMR OF ISB-6

ISB-6  
1H\_8scan DMSO {D:\Spectra} nmr 9

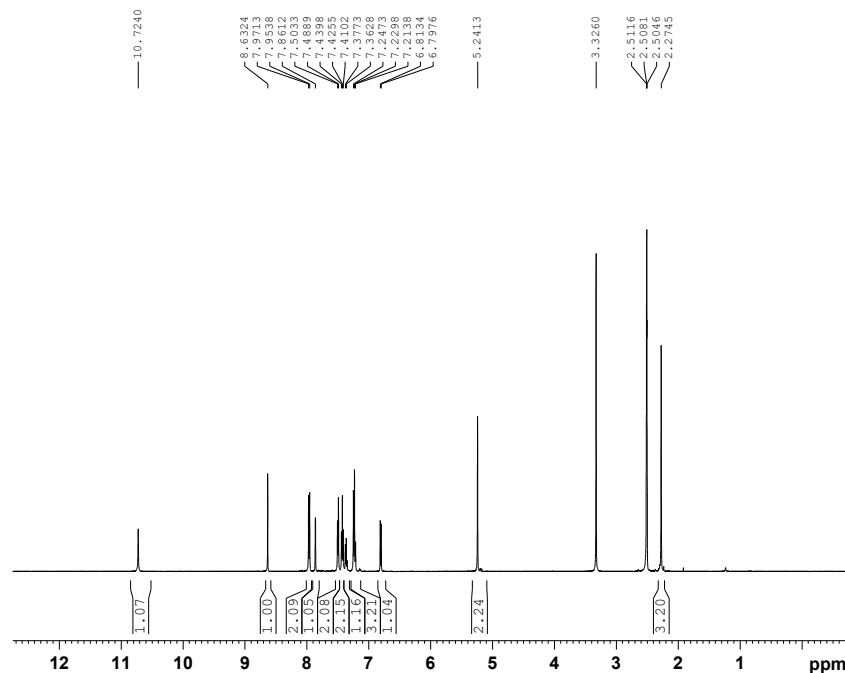

BRUKER  
AVANCE NEO  
500 MHz NMR  
SPECTROMETER  
SAIF, P.U.

```
Current Data Parameters
NAME      Nov23-2022
EXPNO    90
PROCNO   1

F2 - Acquisition Parameters
Date_    20221123
Time     10.29 h
INSTRUM  Avance Neo 500
PROBHD   Z119470_0333 (
PULPROG  zg30
TD        65536
SOLVENT  DMSO
NS        16
DS        0
SWH       14705.883 Hz
FIDRES    0.448788 Hz
AQ        2.2282240 sec
RG        101
DW        34.000 usec
DE        6.79 usec
TE        300.2 K
D1        1.00000000 sec
TD0       1
SFO1      500.1730885 MHz
NUC1      1H
FO        3.33 usec
P1        10.00 usec
PLW1      20.93000031 W

F2 - Processing parameters
SI        65536
SF        500.1700000 MHz
WDW       EM
SSB       0
LB        0.30 Hz
GB        0
PC        1.00
```

### 6.4 <sup>13</sup>C NMR OF ISB-6

ISB-6  
C13CPD DMSO {D:\Spectra} nmr 9

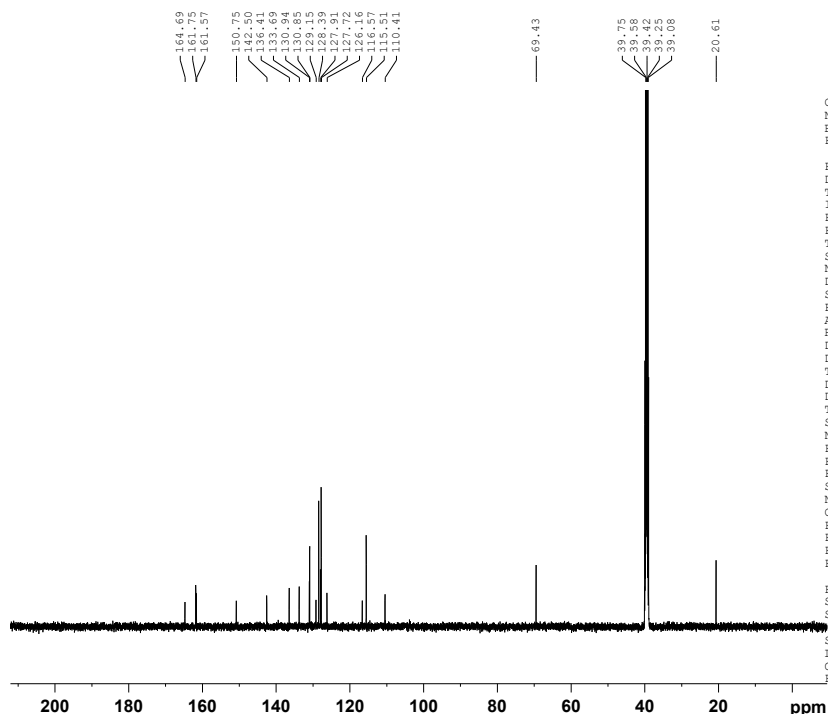

BRUKER  
AVANCE NEO  
500 MHz NMR SPECTROMETER  
SAIF, PANJAB UNIVERSITY,  
CHANDIGARH

```
Current Data Parameters
NAME      Nov23-2022
EXPNO    91
PROCNO   1

F2 - Acquisition Parameters
Date_    20221123
Time     15.39 h
INSTRUM  Avance Neo 500
PROBHD   Z119470_0333 (
PULPROG  zgpg30
TD        65536
SOLVENT  DMSO
NS        512
DS        4
SWH       37037.035 Hz
FIDRES    1.130281 Hz
AQ        0.8847360 sec
RG        101
DW        13.500 usec
DE        6.50 usec
TE        300.1 K
D1        2.00000000 sec
D11       0.03000000 sec
TD0       1
SFO1      125.7804233 MHz
NUC1      13C
FO        3.33 usec
P1        10.00 usec
PLW1      83.14099884 W
SFO2      500.1720007 MHz
NUC2      1H
CPDPRG2  waltz65
PCPD2    80.00 usec
PLW2      20.93000031 W
PLW12     0.32703000 W
PLW13     0.16449000 W

F2 - Processing parameters
SI        32768
SF        125.7679212 MHz
WDW       EM
SSB       0
LB        1.00 Hz
GB        0
PC        1.40
```

## 6.5 MASS INTERPRETATION OF ISB-6

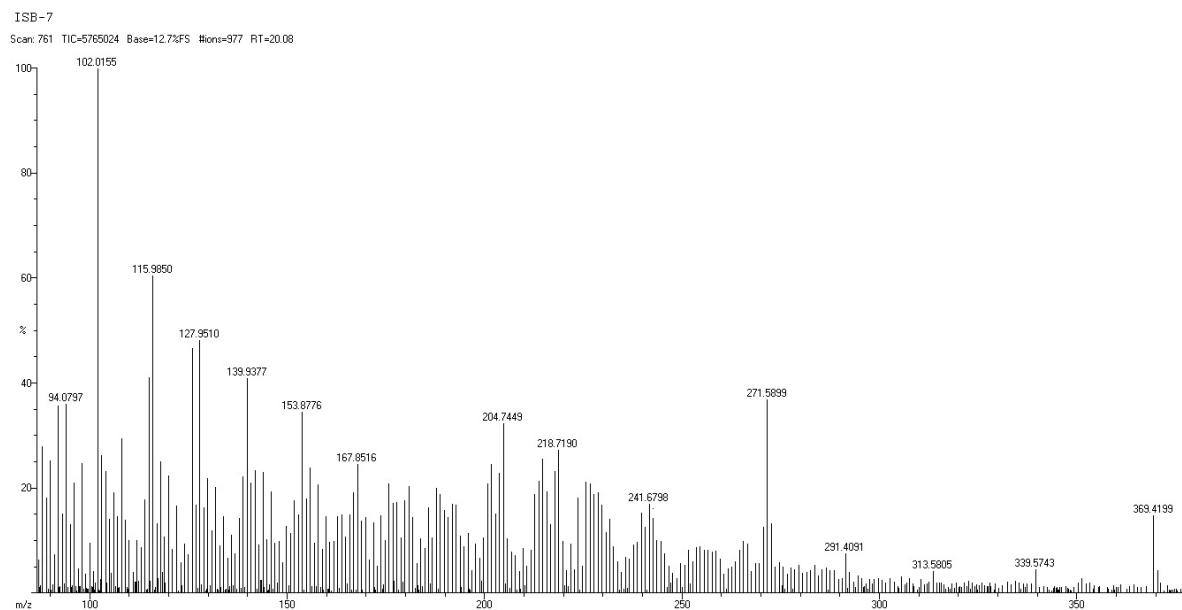

## 6.6 SPECTRAL INTERPRETATION:

*3-((4-(benzyloxy)benzylidene)hydrazineylidene)-5-methylindolin-2-one (ISB6)*: orange, solid, 68%, melting point.  $210 \pm 2^\circ\text{C}$ .  $^1\text{H}$  NMR (500 MHz, DMSO- $d_6$ )  $\delta$ : 10.72 (s, 1H, NH), 8.63 (s, 1H, =CH-), 7.97-6.79(m, 12H, ArH), 5.24 (s, 2H, -CH<sub>2</sub>-), 2.27 (s, 3H, -CH<sub>2</sub>-Ar).  $^{13}\text{C}$  NMR (500 MHz, DMSO- $d_6$ ) 164.69, 161.76, 161.87, 160.75, 142.80, 136.41, 133.69, 130.94, 129.18, 128.39, 127.91, 126.16, 116.87, 115.51, 110.41, 69.43, 20.61. Chemical formula  $\text{C}_{23}\text{H}_{19}\text{N}_3\text{O}_2$ . EI- HRMS (m/z): Calculated-369.4199, Observed- 369.4158.



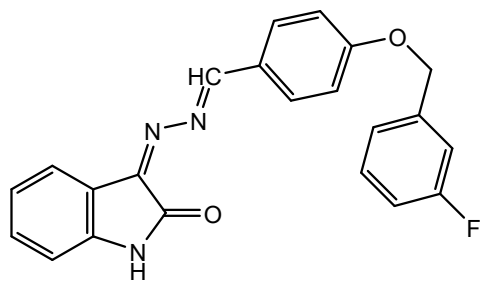

**Figure S7.** ISFB1 structure

7.1 TLC OF ISFB-1: Mobile phase is Hexane: ethyl acetate (70:30)

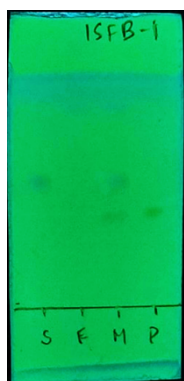

7.2 HPLC OF ISFB-1

## <Sample Information>

Sample Name : isatin001  
 Sample ID : isfb1  
 Data Filename : fluoro and bb\_05-12-2022\_003.lcd  
 Method Filename : isatin.lcm  
 Batch Filename : fluoro and bb.lcb  
 Vial # : 1-2  
 Injection Volume : 20 uL  
 Date Acquired : 12/5/2022 1:39:04 AM  
 Date Processed : 12/6/2022 4:20:08 AM

Sample Type : Standard  
 Level : 1  
 Acquired by : System Administrator  
 Processed by : System Administrator

## <Chromatogram>

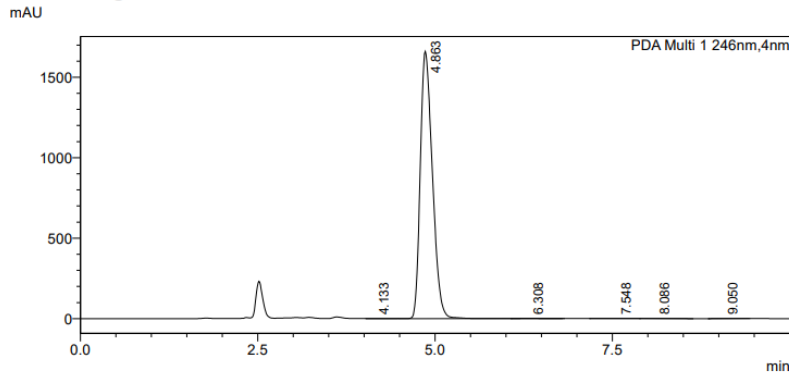

## <Peak Table>

| Peak# | Ret. Time | Area     | Height  | Conc.  | Unit | Mark | Name |
|-------|-----------|----------|---------|--------|------|------|------|
| 1     | 4.133     | 16616    | 898     | 0.084  |      |      |      |
| 2     | 4.863     | 19734389 | 1659909 | 99.606 |      | SV   |      |
| 3     | 6.308     | 34168    | 1978    | 0.172  |      | T    |      |
| 4     | 7.548     | 12384    | 449     | 0.063  |      |      |      |
| 5     | 8.086     | 11333    | 558     | 0.057  |      | V    |      |
| 6     | 9.050     | 3584     | 189     | 0.018  |      |      |      |
| Total |           | 19812474 | 1663981 |        |      |      |      |

## 7.3 <sup>1</sup>H NMR OF ISFB-1

ISFB-1  
 1H\_8scan DMSO {D:\Spectra} nmr 10

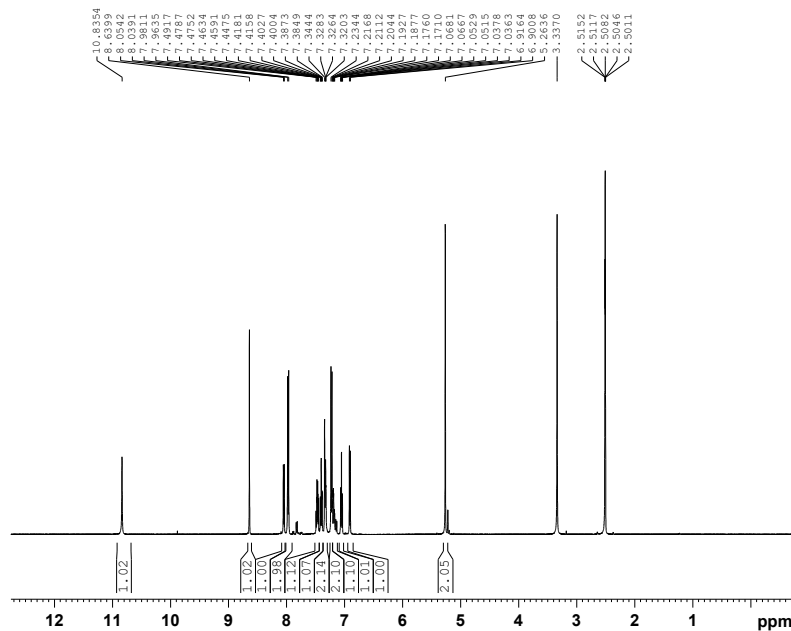

BRUKER  
 AVANCE NEO  
 500 MHz NMR  
 SPECTROMETER  
 SAIF, P.U.

Current Data Parameters  
 NAME Nov23-2022  
 EXPNO 100  
 PROCNO 1

F2 - Acquisition Parameters  
 Date 20221123  
 Time 10.32 h  
 INSTRUM Avance Neo 500  
 PROBHD Z119470\_0333 ( )  
 PULPROG zg30  
 TD 65536  
 SOLVENT DMSO  
 NS 16  
 DS 0  
 SWH 14705.883 Hz  
 FIDRES 0.448788 Hz  
 AQ 2.2282240 sec  
 RG 101  
 DW 34.000 usec  
 DE 6.79 usec  
 TE 300.2 K  
 D1 1.00000000 sec  
 TD0 1  
 SFO1 500.1730885 MHz  
 NUC1 1H  
 P0 3.33 usec  
 P1 10.00 usec  
 PLW1 20.93000031 W

F2 - Processing parameters  
 SI 65536  
 SF 500.1700000 MHz  
 WDW EM  
 SSB 0  
 LB 0.30 Hz  
 GB 0  
 PC 1.00

## 7.4 <sup>13</sup>C NMR OF ISFB-1

ISFB-1  
 C13CPD DMSO {D:\Spectra} nmr 10

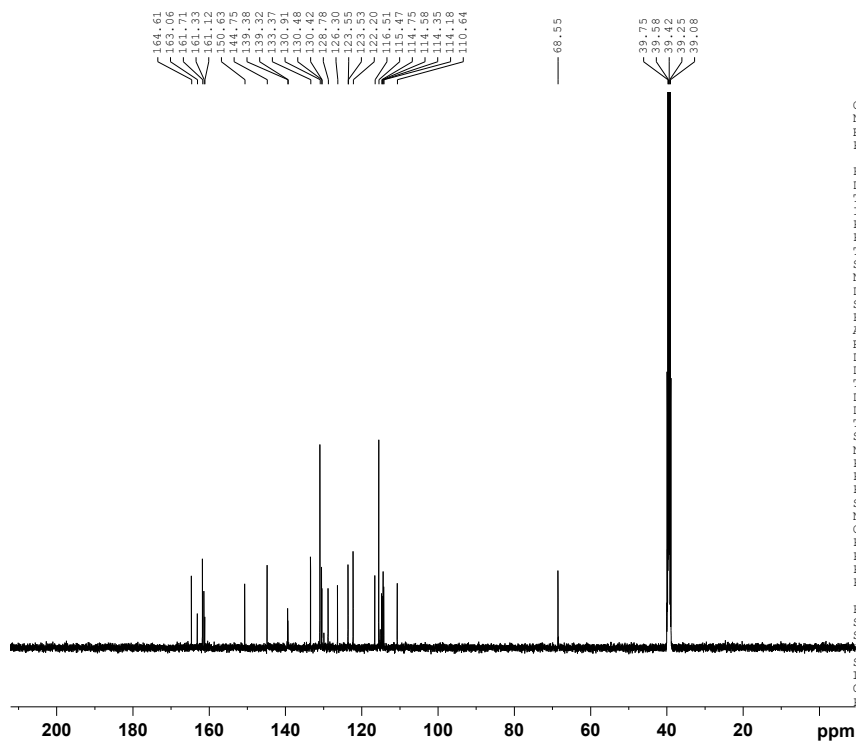

BRUKER  
 AVANCE NEO  
 500 MHz NMR SPECTROMETER  
 SAIF, PANJAB UNIVERSITY,  
 CHANDIGARH

Current Data Parameters  
 NAME Nov23-2022  
 EXPNO 101  
 PROCNO 1

F2 - Acquisition Parameters  
 Date\_ 20221123  
 Time 16.06 h  
 INSTRUM Avance Neo 500  
 PROBHD Z119470\_0333 (  
 PULPROG zgpg30  
 TD 65536  
 SOLVENT DMSO  
 NS 512  
 DS 4  
 SWH 37037.035 Hz  
 FIDRES 1.130281 Hz  
 AQ 0.8847360 sec  
 RG 101  
 DW 13.500 usec  
 DE 6.50 usec  
 TE 300.2 K  
 D1 2.00000000 sec  
 D11 0.03000000 sec  
 TDD 1  
 SFO1 125.7804233 MHz  
 NUC1 13C  
 P0 3.33 usec  
 P1 10.00 usec  
 PLW1 83.14099884 W  
 SFO2 500.1720007 MHz  
 NUC2 1H  
 CPDPRG[2] waltz65  
 PCPD2 80.00 usec  
 PLW2 20.93000031 W  
 PLW12 0.32703000 W  
 PLW13 0.16449000 W

F2 - Processing parameters  
 SI 32768  
 SF 125.7679210 MHz  
 WDW EM  
 SSB 0  
 LB 1.00 Hz  
 GB 0  
 PC 1.40

## 7.5 MASS SPECTRA OF ISFB-1

ISFB-1

Scan: 715 TIC=6459648 Base=14.7%FS #Ions=1032 RT=18.93

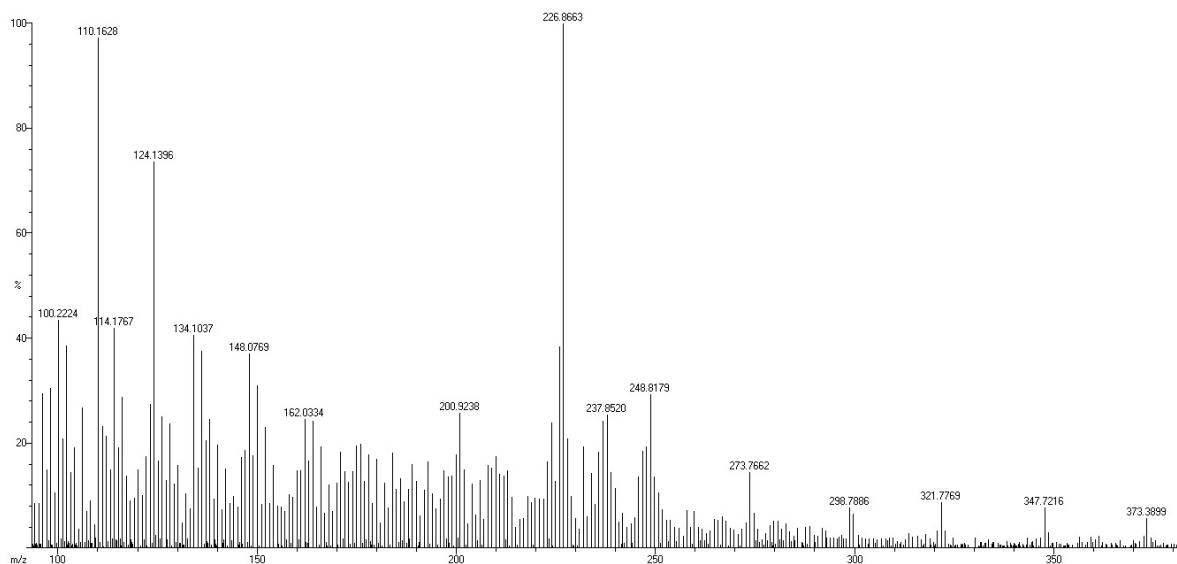

## 7.6 SPECTRAL INTERPRETATION:

3-((4-((3-fluorobenzyl)oxy)benzylidene)hydrazineylidene)indolin-2-one (**ISFB1**): orange, solid, 75%, melting point.  $218 \pm 2^\circ\text{C}$ .  $^1\text{H NMR}$  (500 MHz, DMSO- $d_6$ )  $\delta$ : 10.83 (s, 1H, NH), 8.63 (s, 1H, =CH-), 8.05-6.90(m, 12H, ArH), 5.26 (s, 2H, -CH $_2$ -).  $^{13}\text{C NMR}$  (500 MHz, DMSO- $d_6$ )  $\delta$ : 164.61, 163.06, 161.71, 150.63, 144.76, 139.38, 133.37, 130.91, 128.78, 126.30, 123.66, 122.20, 116.81, 115.47, 114.75, 110.64, 68.88. Chemical formula  $\text{C}_{22}\text{H}_{16}\text{FN}_3\text{O}_2$ . EI- HRMS (m/z): Calculated-373.3899, Observed- 373.3797.

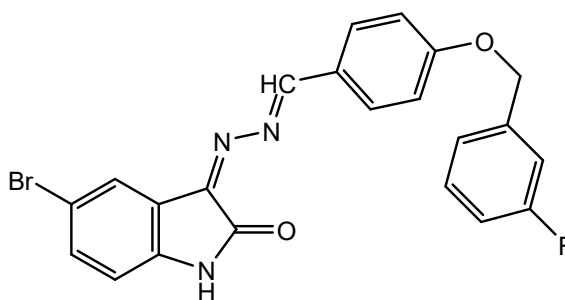

**Figure S8.** ISFB2 structure

8.1 TLC OF ISFB-2: Mobile phase is Hexane: ethyl acetate (70:30)

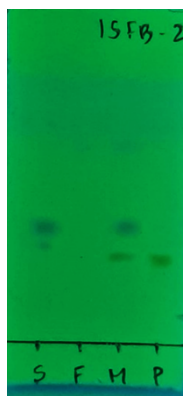

## 8.2 HPLC OF ISFB-2

### SHIMADZU LabSolutions Analysis Report

#### <Sample Information>

Sample Name : isatin001  
 Sample ID : isfb2  
 Data Filename : fluoro and bb\_05-12-2022\_004.lcd  
 Method Filename : isatin.lcm  
 Batch Filename : fluoro and bb.lcb  
 Vial # : 1-3  
 Injection Volume : 20 uL  
 Date Acquired : 12/5/2022 1:49:26 AM  
 Date Processed : 12/6/2022 10:37:55 PM

Sample Type : Standard  
 Level : 1  
 Acquired by : System Administrator  
 Processed by : System Administrator

#### <Chromatogram>

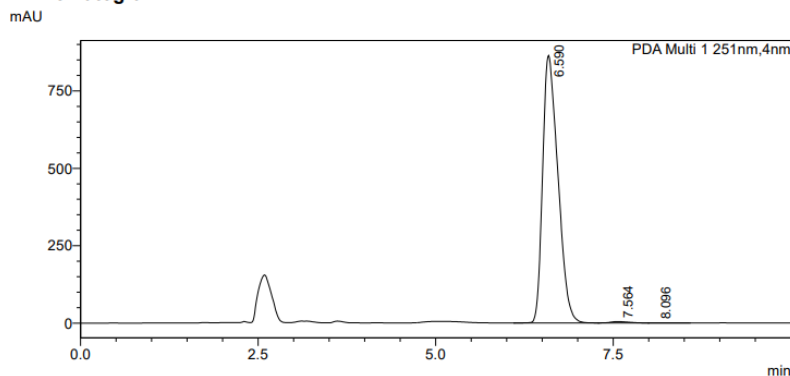

#### <Peak Table>

| Peak# | Ret. Time | Area     | Height | Conc.  | Unit | Mark | Name |
|-------|-----------|----------|--------|--------|------|------|------|
| 1     | 6.590     | 12988987 | 864298 | 99.271 |      |      |      |
| 2     | 7.564     | 89640    | 4934   | 0.685  |      | V    |      |
| 3     | 8.096     | 5746     | 308    | 0.044  |      | V    |      |
| Total |           | 13084373 | 869540 |        |      |      |      |

## 8.3 <sup>1</sup>H NMR OF ISFB-2

ISFB-2  
 1H\_8scan DMSO {D:\Spectra} nmr 11

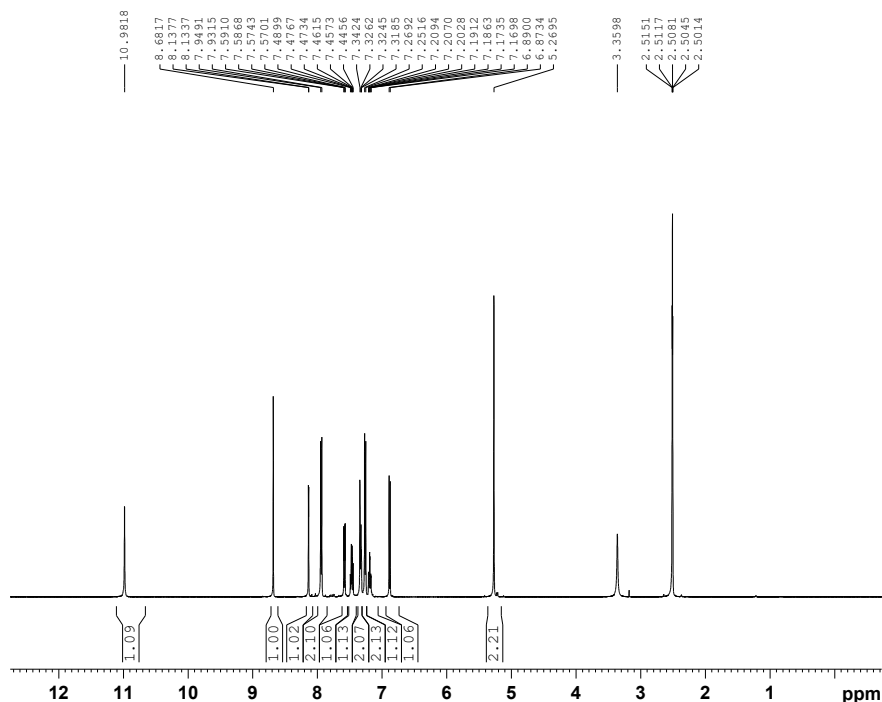

BRUKER  
 AVANCE NEO  
 500 MHz NMR  
 SPECTROMETER  
 SAIF, P.U.

Current Data Parameters  
 NAME Nov23-2022  
 EXPNO 110  
 PROCNO 1

F2 - Acquisition Parameters  
 Date\_ 20221123  
 Time\_ 10.34 h  
 INSTRUM Avance Neo 500  
 PROBHD Z119470\_0333 ( )  
 PULPROG zg30  
 TD 65536  
 SOLVENT DMSO  
 NS 16  
 DS 0  
 SWH 14705.883 Hz  
 FIDRES 0.448788 Hz  
 AQ 2.2282240 sec  
 RG 101  
 DW 34.000 usec  
 DE 6.79 usec  
 TE 300.2 K  
 D1 1.0000000 sec  
 TD0 1  
 SFO1 500.1730885 MHz  
 NUC1 1H  
 PU 3.33 usec  
 P1 10.00 usec  
 PLW1 20.93000031 W

F2 - Processing parameters  
 SI 65536  
 SF 500.1700000 MHz  
 WDW EM  
 SSB 0  
 LB 0.30 Hz  
 GB 0  
 PC 1.00

## 8.4 <sup>13</sup>C NMR OF ISFB-2

ISFB-2  
C13CPD DMSO {D:\Spectra} nmr 11

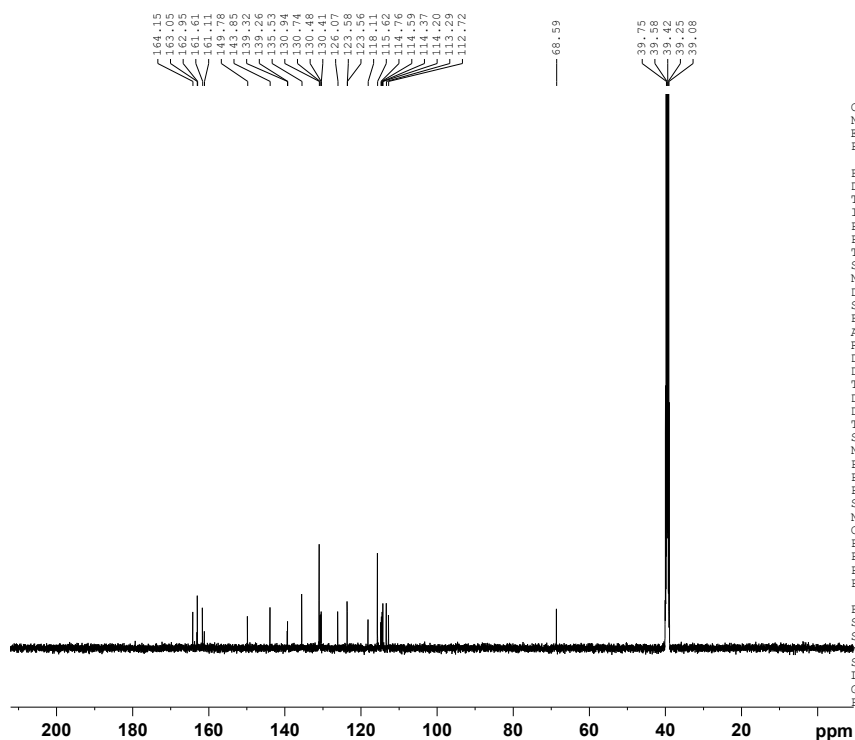

BRUKER  
AVANCE NEO  
500 MHz NMR SPECTROMETER  
SAIF, PANJAB UNIVERSITY,  
CHANDIGARH

Current Data Parameters  
NAME Nov23-2022  
Date 20221123  
Time 19.31 h  
INSTRUM Avance Neo 500  
PROBHD Z119470\_0333 (  
PULPROG zgpg30  
TD 65536  
SOLVENT DMSO  
NS 512  
DS 4  
SWH 37037.035 Hz  
FIDRES 1.130281 Hz  
AQ 0.8847360 sec  
RG 101  
DW 13.500 usec  
DE 6.50 usec  
TE 300.1 K  
D1 2.0000000 sec  
D11 0.0300000 sec  
TD0 1  
SF01 125.7804233 MHz  
NUC1 13C  
P0 3.33 usec  
P1 10.00 usec  
PLW1 83.14099884 W  
SF02 500.1720007 MHz  
NUC2 1H  
CPDPRG[2] waltz65  
PCPD2 80.00 usec  
PLW2 20.9300031 W  
PLW12 0.32703000 W  
PLW13 0.16449000 W

F2 - Processing parameters  
SI 32768  
SF 125.7679213 MHz  
WDW EM  
SSB 0  
LB 1.00 Hz  
GB 0  
PC 1.40

## 8.5 MASS SPECTRA OF ISFB-2

ISFB-2  
Scan 712 TIC=7847632 Base=16.94FS # ions=972 RT=18.85

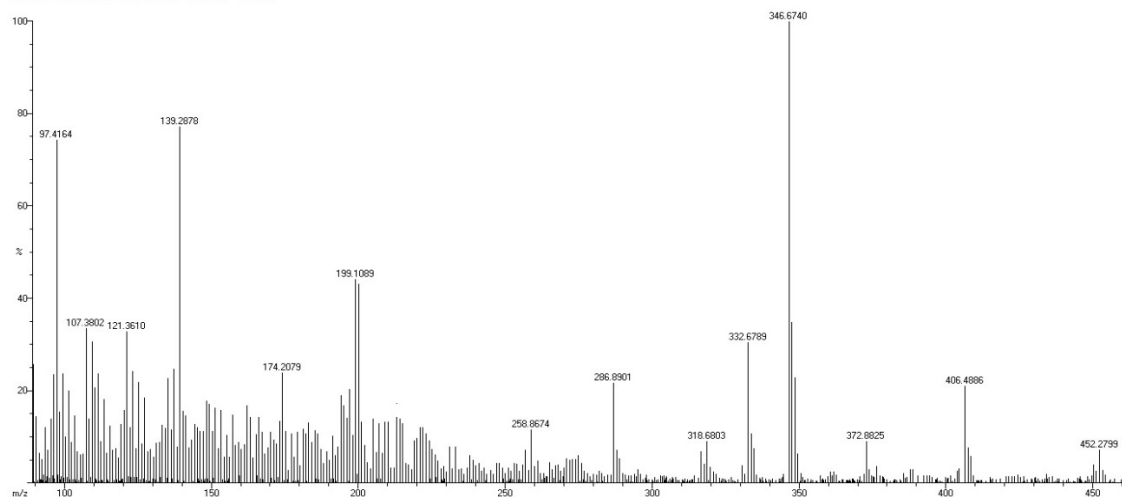

## 8.6 SPECTRAL INTERPRETATION:

*5-bromo-3-((4-((3-fluorobenzyl)oxy)benzylidene)hydrazineylidene)indolin-2-one (ISFB2):*

Dark orange, solid, 68%, melting point.  $240 \pm 2^\circ\text{C}$ . <sup>1</sup>H NMR (500 MHz, DMSO-d<sub>6</sub>)  $\delta$ : 10.98

(s, 1H, NH), 8.68 (s, 1H, =CH-), 8.13-6.87 (m, 11H, ArH), 5.26 (s, 2H, -CH<sub>2</sub>-).<sup>13</sup>C NMR (500 MHz, DMSO-d<sub>6</sub>) 164.18, 163.08, 162.95, 161.61, 149.78, 143.85, 139.32, 136.83, 130.94, 126.07, 123.58, 118.11, 114.76, 113.29, 112.72, 68.69. Chemical formula C<sub>22</sub>H<sub>15</sub>BrFN<sub>3</sub>O<sub>2</sub>. EI-HRMS (m/z): Calculated-452.2799, Observed- 452.2758.

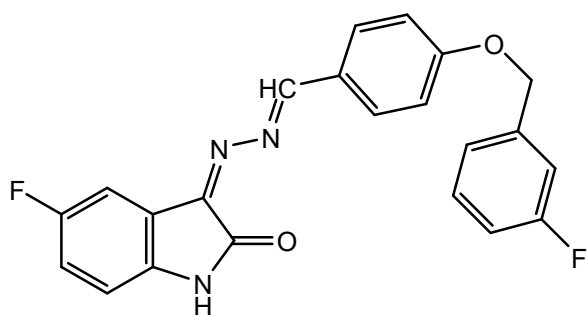

**Figure S9.** ISFB3 structure

9.1 TLC OF ISFB-3: Mobile phase is Hexane: ethyl acetate (70:30)

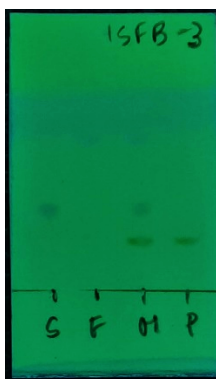

## 9.2 HPLC OF ISFB-3

### SHIMADZU LabSolutions Analysis Report

#### <Sample Information>

Sample Name : isatin001  
 Sample ID : isfb3  
 Data Filename : fluoro and bb\_05-12-2022\_005.lcd  
 Method Filename : isatin.lcm  
 Batch Filename : fluoro and bb.lcb  
 Vial # : 1-4  
 Injection Volume : 20 uL  
 Date Acquired : 12/5/2022 1:59:47 AM  
 Date Processed : 12/6/2022 10:38:58 PM  
 Sample Type : Standard  
 Level : 1  
 Acquired by : System Administrator  
 Processed by : System Administrator

#### <Chromatogram>

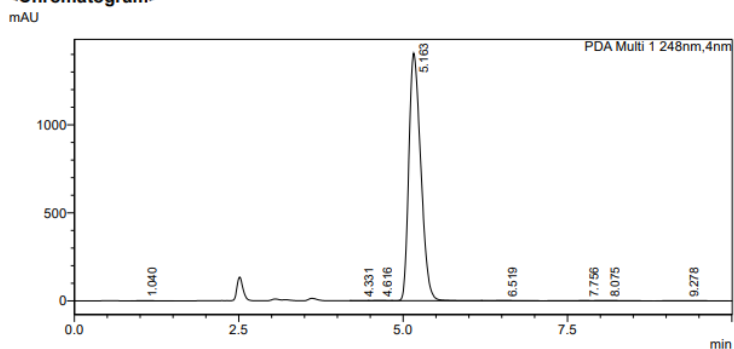

#### <Peak Table>

| Peak# | Ret. Time | Area     | Height  | Conc.  | Unit | Mark | Name |
|-------|-----------|----------|---------|--------|------|------|------|
| 1     | 1.040     | 2803     | 136     | 0.016  |      |      |      |
| 2     | 4.331     | 1171     | 138     | 0.007  |      |      |      |
| 3     | 4.616     | 19751    | 1534    | 0.110  |      |      |      |
| 4     | 5.163     | 17785891 | 1406472 | 99.151 |      | V    |      |
| 5     | 6.519     | 35192    | 1861    | 0.196  |      | V    |      |
| 6     | 7.756     | 34287    | 1238    | 0.191  |      |      |      |
| 7     | 8.075     | 44788    | 2043    | 0.250  |      | V    |      |
| 8     | 9.278     | 14236    | 523     | 0.079  |      |      |      |
| Total |           | 17938119 | 1413946 |        |      |      |      |

## 9.3 <sup>1</sup>H NMR OF ISFB-3:



ISFB-3  
1H\_8scan DMSO {D:\Spectra} nmr 12

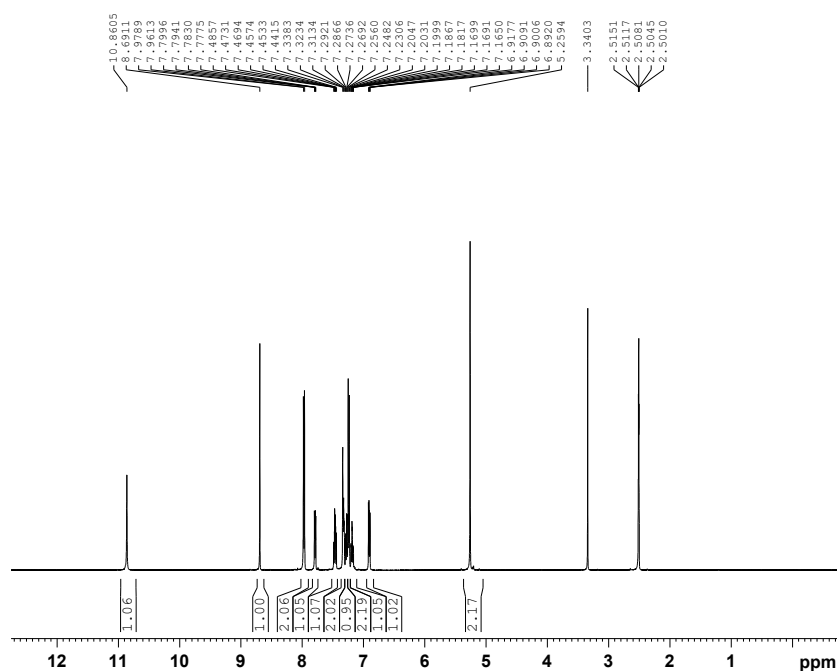

BRUKER  
AVANCE NEO  
500 MHz NMR  
SPECTROMETER  
SAIF, P.U.

Current Data Parameters  
NAME Nov23-2022  
EXPNO 120  
PROCNO 1

F2 - Acquisition Parameters  
Date\_ 20221123  
Time\_ 10.36 h  
INSTRUM Avance Neo 500  
PROBHD Z119470\_0333 (  
PULPROG zg30  
TD 65536  
SOLVENT DMSO  
NS 16  
DS 0  
SWH 14705.883 Hz  
FIDRES 0.448788 Hz  
AQ 2.2282240 sec  
RG 95.7854  
DW 34.000 usec  
DE 6.79 usec  
TE 300.2 K  
D1 1.00000000 sec  
TD0 1  
SFO1 500.1730885 MHz  
NUC1 1H  
P0 3.33 usec  
P1 10.00 usec  
PLW1 20.93000031 W

F2 - Processing parameters  
SI 65536  
SF 500.1700000 MHz  
WDW EM  
SSB 0  
LB 0.30 Hz  
GB 0  
PC 1.00

### 9.4 <sup>13</sup>C NMR OF ISFB-3:

ISFB-3  
C13CPD DMSO {D:\Spectra} nmr 12

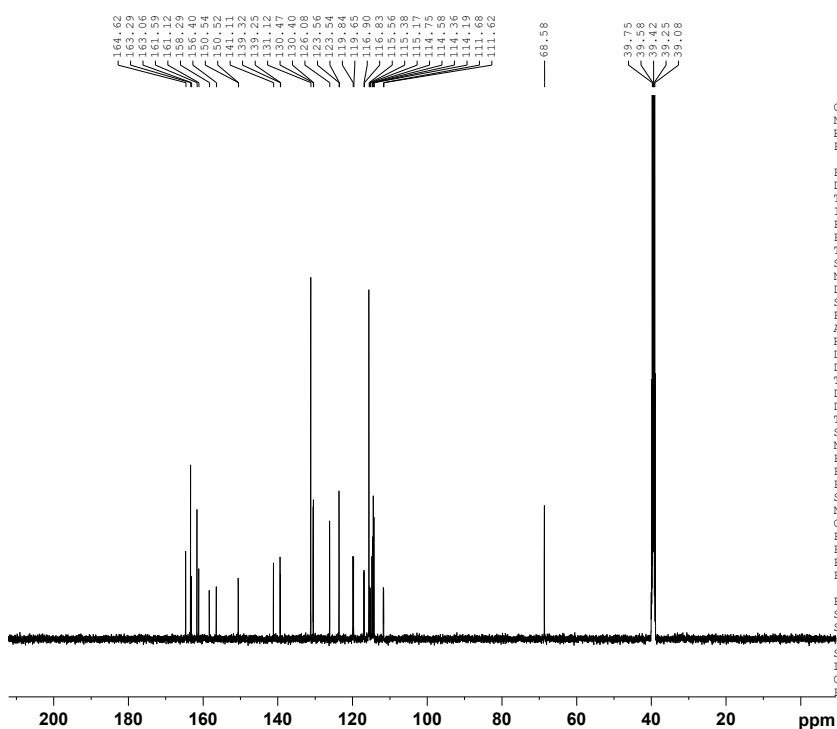

BRUKER  
AVANCE NEO  
500 MHz NMR SPECTROMETER  
SAIF, PANJAB UNIVERSITY,  
CHANDIGARH

Current Data Parameters  
NAME Nov23-2022  
EXPNO 121  
PROCNO 1

F2 - Acquisition Parameters  
Date\_ 20221123  
Time\_ 19.57 h  
INSTRUM Avance Neo 500  
PROBHD Z119470\_0333 (  
PULPROG zgpg30  
TD 65536  
SOLVENT DMSO  
NS 512  
DS 4  
SWH 37037.035 Hz  
FIDRES 1.130281 Hz  
AQ 0.8847360 sec  
RG 101  
DW 13.500 usec  
DE 6.50 usec  
TE 300.2 K  
D1 2.00000000 sec  
D11 0.03000000 sec  
TD0 1  
SFO1 125.7804233 MHz  
NUC1 13C  
P0 3.33 usec  
P1 10.00 usec  
PLW1 83.14099884 W  
SFO2 500.1720007 MHz  
NUC2 1H  
CPDPRG[2] waltz65  
PCPD2 80.00 usec  
PLW2 20.93000031 W  
PLW12 0.32703000 W  
PLW13 0.16449000 W

F2 - Processing parameters  
SI 32768  
SF 125.7679208 MHz  
WDW EM  
SSB 0  
LB 1.00 Hz  
GB 0  
PC 1.40

### 9.5 MASS SPECTRUM OF ISFB-3:

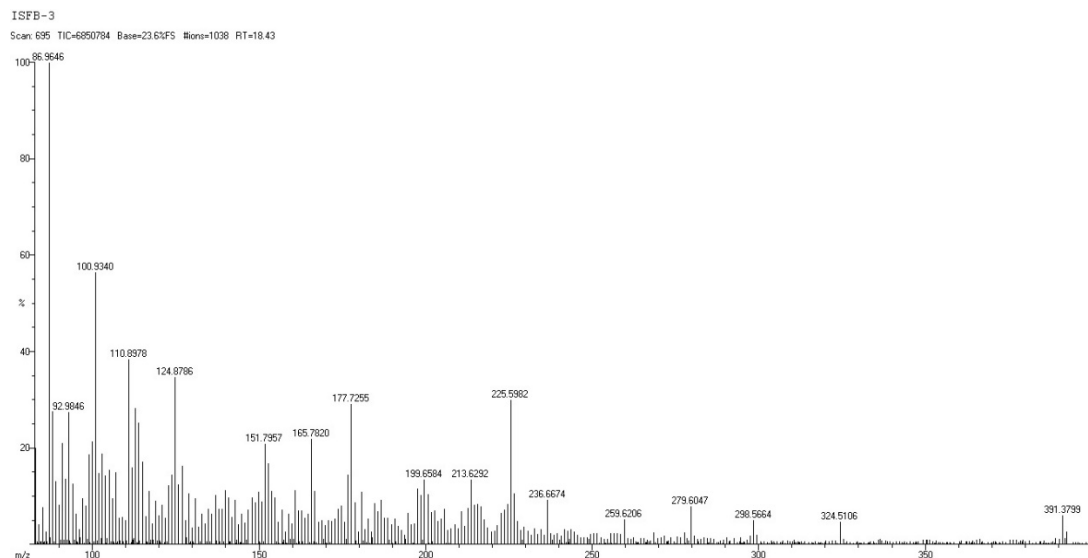

## 9.6 SPECTRAL INTERPRETATION:

*5-fluoro-3-((4-((3-fluorobenzyl)oxy)benzylidene)hydrazineylidene)indolin-2-one* (**ISFB3**):  
Brick red, solid, 82%, melting point.  $230 \pm 2^\circ\text{C}$ .  $^1\text{H NMR}$  (500 MHz, DMSO- $d_6$ )  $\delta$ : 10.86 (s, 1H, NH), 8.69 (s, 1H, =CH-), 7.97-6.89(m, 11H, ArH), 5.25 (s, 2H, -CH<sub>2</sub>-).  $^{13}\text{C NMR}$  (500 MHz, DMSO- $d_6$ ) 164.62, 163.29, 161.89, 158.29, 156.40, 150.54, 141.11, 139.32, 131.12, 130.47, 126.08, 123.86, 119.84, 116.90, 115.66, 114.75, 111.68, 68.58. Chemical formula  $\text{C}_{22}\text{H}_{15}\text{F}_2\text{N}_3\text{O}_2$ . EI- HRMS (m/z): Calculated-391.3799, Observed- 391.3702.

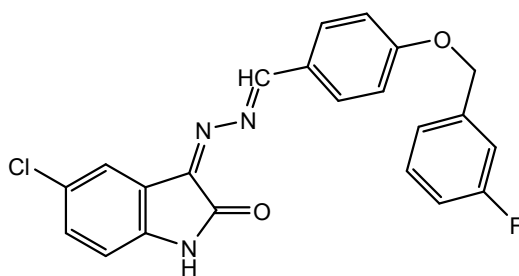

**Figure S10.** ISFB4 structure

10.1 TLC OF ISFB-4: Mobile phase is Hexane: ethyl acetate (70:30)

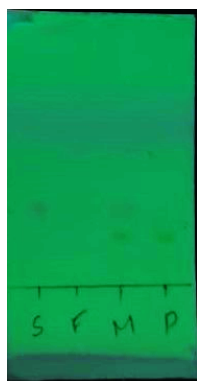

10.2 HPLC OF ISFB-4

SHIMADZU LabSolutions Analysis Report

<Sample Information>

Sample Name : isatin001  
 Sample ID : isfb4  
 Data Filename : fluoro and bb\_05-12-2022\_006.lcd  
 Method Filename : isatin.lcm  
 Batch Filename : fluoro and bb.lcb  
 Vial # : 1-5  
 Injection Volume : 20 uL  
 Date Acquired : 12/5/2022 2:10:10 AM  
 Date Processed : 12/6/2022 4:31:29 AM  
 Sample Type : Standard  
 Level : 1  
 Acquired by : System Administrator  
 Processed by : System Administrator

<Chromatogram>

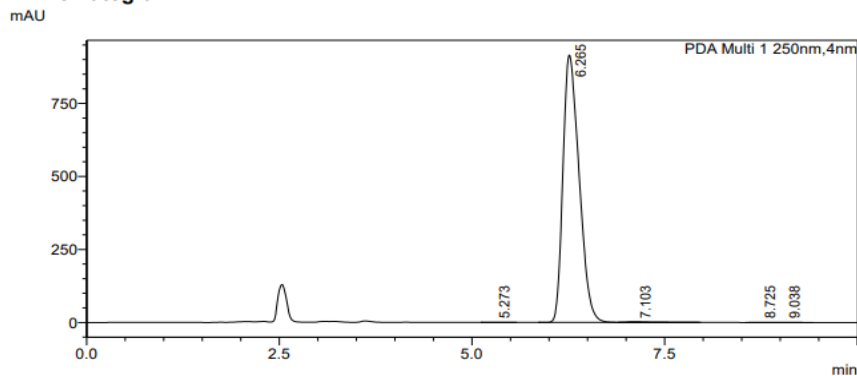

<Peak Table>

| Peak# | Ret. Time | Area     | Height | Conc.  | Unit | Mark | Name |
|-------|-----------|----------|--------|--------|------|------|------|
| 1     | 5.273     | 3583     | 317    | 0.027  |      |      |      |
| 2     | 6.265     | 13393299 | 914624 | 99.620 |      | S    |      |
| 3     | 7.103     | 41061    | 2069   | 0.305  |      | T    |      |
| 4     | 8.725     | 2877     | 172    | 0.021  |      |      |      |
| 5     | 9.038     | 3518     | 242    | 0.026  |      | V    |      |
| Total |           | 13444337 | 917424 |        |      |      |      |

### 10.3 <sup>1</sup>H NMR OF ISFB-4

ISFB-4

1H\_8scan DMSO {D:\Spectra} nmr 13

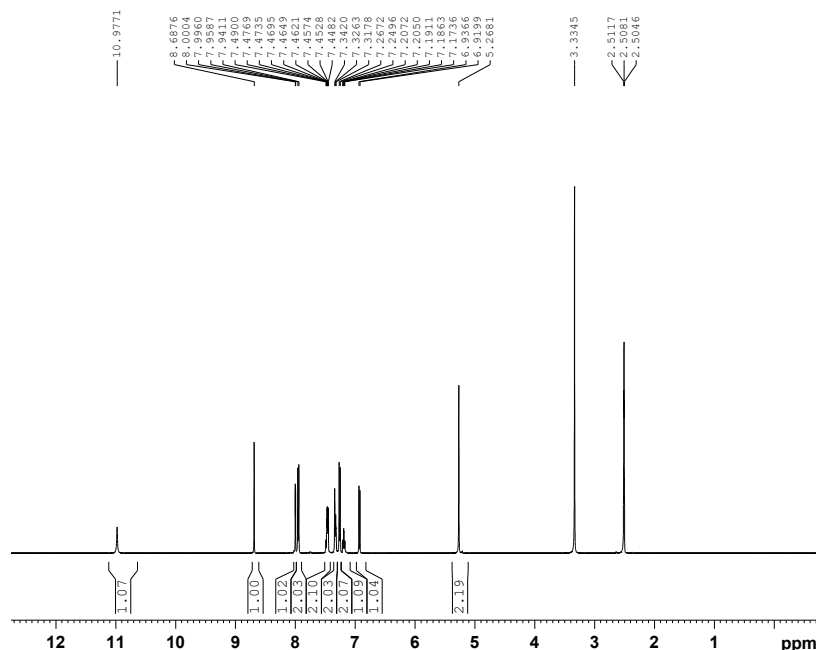

BRUKER  
 AVANCE NEO  
 500 MHz NMR  
 SPECTROMETER  
 SAIF, P.U.

Current Data Parameters  
 NAME Nov23-2022  
 EXPNO 130  
 PROCNO 1

F2 - Acquisition Parameters  
 Date\_ 20221123  
 Time 10.39 h  
 INSTRUM Avance Neo 500  
 PROBHD Z119470\_0333 (  
 PULPROG zg30  
 TD 65536  
 SOLVENT DMSO  
 NS 16  
 DS 0  
 SWH 14705.883 Hz  
 FIDRES 0.448788 Hz  
 AQ 2.2282240 sec  
 RG 101  
 DW 34.000 usec  
 DE 6.79 usec  
 TE 300.2 K  
 D1 1.00000000 sec  
 TDO 1  
 SFO1 500.1730885 MHz  
 NUC1 1H  
 FO 3.33 usec  
 P1 10.00 usec  
 PLW1 20.93000031 W

F2 - Processing parameters  
 SI 65536  
 SF 500.1700000 MHz  
 WDW EM  
 SSB 0  
 LB 0.30 Hz  
 GB 0  
 FC 1.00

### 10.4 <sup>13</sup>C NMR OF ISFB-4

ISFB-4

C13CPD DMSO {D:\Spectra} nmr 13

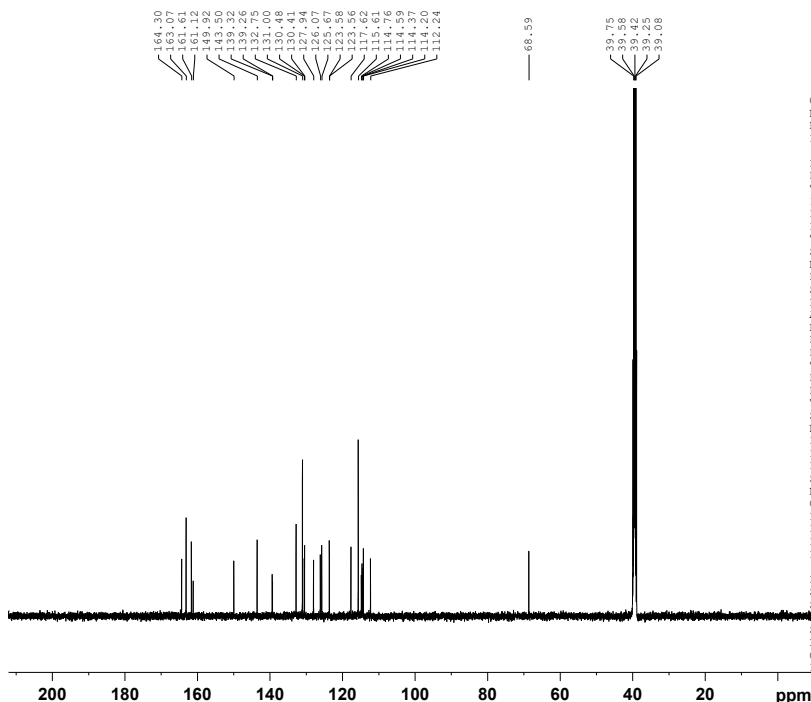

BRUKER  
 AVANCE NEO  
 500 MHz NMR SPECTROMETER  
 SAIF, PANJAB UNIVERSITY,  
 CHANDIGARH

Current Data Parameters  
 NAME Nov23-2022  
 EXPNO 131  
 PROCNO 1

F2 - Acquisition Parameters  
 Date\_ 20221123  
 Time 20.24 h  
 INSTRUM Avance Neo 500  
 PROBHD Z119470\_0333 (  
 PULPROG zgpg30  
 TD 65536  
 SOLVENT DMSO  
 NS 512  
 DS 4  
 SWH 37037.035 Hz  
 FIDRES 1.130281 Hz  
 AQ 0.8847360 sec  
 RG 101  
 DW 13.500 usec  
 DE 6.50 usec  
 TE 300.1 K  
 D1 2.00000000 sec  
 D11 0.03000000 sec  
 TDO 1  
 SFO1 125.7804233 MHz  
 NUC1 13C  
 FO 3.33 usec  
 P1 10.00 usec  
 PLW1 83.14099884 W  
 SFO2 500.1720007 MHz  
 NUC2 1H  
 CPDPRG2 waltz65  
 ECPD2 80.00 usec  
 PLW2 20.93000031 W  
 PLW12 0.32703000 W  
 PLW13 0.16449000 W

F2 - Processing parameters  
 SI 32768  
 SF 125.7679207 MHz  
 WDW EM  
 SSB 0  
 LB 1.00 Hz  
 GB 0  
 FC 1.40

## 10.5 MASS SPECTRA OF ISFB-4

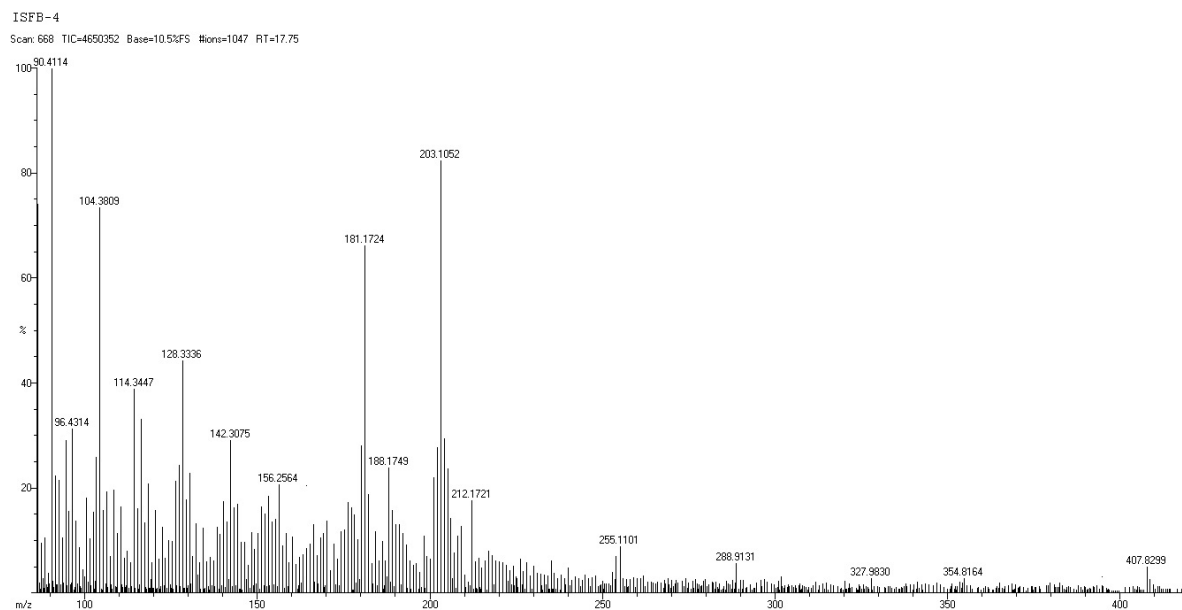

## 10.6 SPECTRAL INTERPRETATION:

*5-chloro-3-((4-((3-fluorobenzyl)oxy)benzylidene)hydrazineylidene)indolin-2-one* (**ISFB4**): Orange, solid, 78%, melting point.  $239 \pm 2^\circ\text{C}$ .  $^1\text{H}$  NMR (500 MHz, DMSO- $d_6$ )  $\delta$ : 10.97 (s, 1H, NH), 8.68 (s, 1H, =CH-), 8.00-6.91 (m, 11H, ArH), 5.26 (s, 2H, -CH $_2$ -).  $^{13}\text{C}$  NMR (500 MHz, DMSO- $d_6$ ) 164.30, 163.07, 161.61, 149.92, 143.60, 139.32, 132.76, 131.00, 130.46, 127.94, 126.07, 125.67, 123.66, 117.62, 116.61, 114.76, 112.24, 68.69. Chemical formula  $\text{C}_{22}\text{H}_{15}\text{ClFN}_3\text{O}_2$ . EI- HRMS (m/z): Calculated-407.8299, Observed- 407.8248.

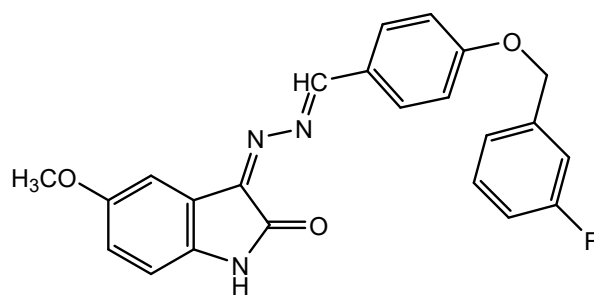

**Figure S11.** ISFB5 structure

11.1 TLC OF ISFB-5: Mobile phase is Hexane: ethyl acetate (70:30)

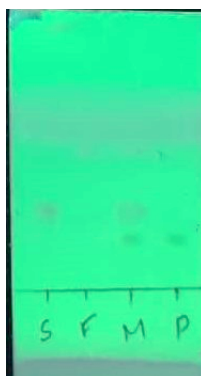

11.2 HPLC OF ISFB-5

**SHIMADZU LabSolutions Analysis Report**

**<Sample Information>**

Sample Name : isatin001  
 Sample ID : isfb5  
 Data Filename : fluoro and bb\_05-12-2022\_007.lcd  
 Method Filename : isatin.lcm  
 Batch Filename : fluoro and bb.lcb  
 Vial # : 1-6  
 Injection Volume : 20 uL  
 Date Acquired : 12/5/2022 2:20:31 AM  
 Date Processed : 12/6/2022 4:33:15 AM  
 Sample Type : Standard  
 Level : 1  
 Acquired by : System Administrator  
 Processed by : System Administrator

**<Chromatogram>**

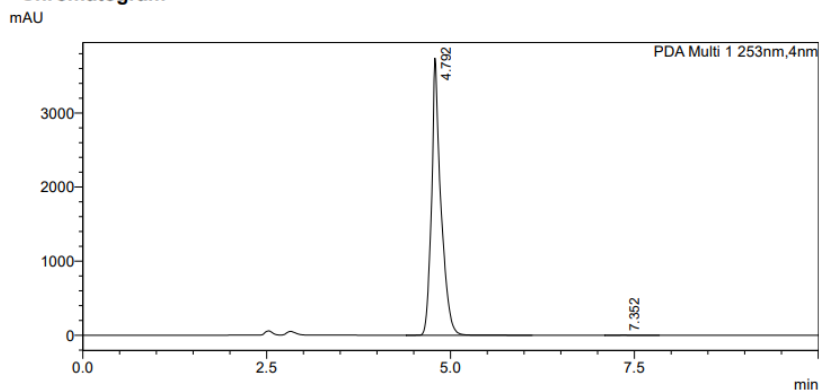

**<Peak Table>**

| Peak# | Ret. Time | Area     | Height  | Conc.  | Unit | Mark | Name |
|-------|-----------|----------|---------|--------|------|------|------|
| 1     | 4.792     | 33082034 | 3741328 | 99.973 |      |      |      |
| 2     | 7.352     | 8796     | 486     | 0.027  |      |      |      |
| Total |           | 33090830 | 3741814 |        |      |      |      |

### 11.3 <sup>1</sup>H NMR OF ISFB-5

ISFB-5  
1H\_8scan DMSO {D:\Spectra} nmr 14

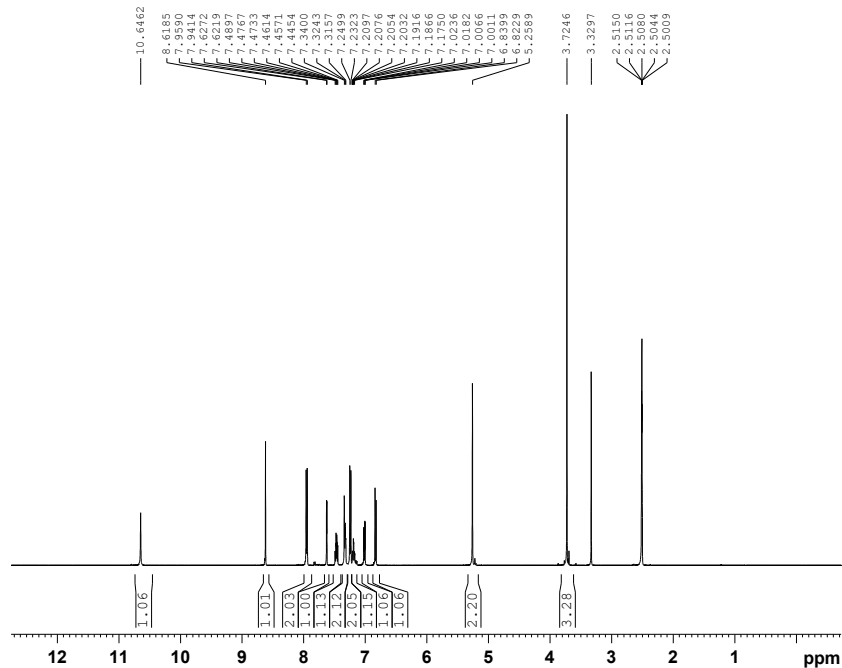

BRUKER  
AVANCE NEO  
500 MHz NMR  
SPECTROMETER  
SAIF, P.U.

```
Current Data Parameters
NAME      Nov23-2022
EXPNO    140
PROCNO   1

F2 - Acquisition Parameters
Date_    20221123
Time     10.41 h
INSTRUM  Avance Neo 500
PROBHD   Z119470_0333 (
PULPROG  zg30
TD        65536
SOLVENT  DMSO
NS        16
DS        0
SWH       14705.883 Hz
FIDRES    0.448788 Hz
AQ         2.2282240 sec
RG         101
DW         34.000 usec
DE         6.79 usec
TE         300.2 K
D1         1.00000000 sec
TD0        1
SF01       500.1730885 MHz
NUC1       1H
P0         3.33 usec
P1         10.00 usec
PLW1       20.93000031 W

F2 - Processing parameters
SI         65536
SF         500.1700000 MHz
WDW        EM
SSB        0
LB         0.30 Hz
GB         0
PC         1.00
```

### 11.4 <sup>13</sup>C NMR OF ISFB-5

ISFB-5  
C13CPD DMSO {D:\Spectra} nmr 14

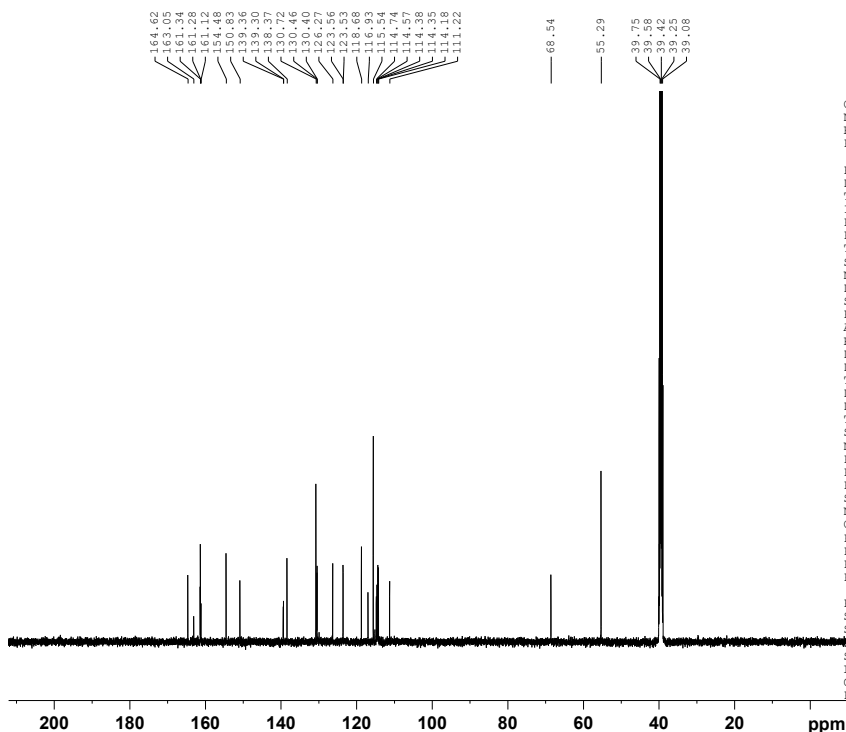

BRUKER  
AVANCE NEO  
500 MHz NMR SPECTROMETER  
SAIF, PANJAB UNIVERSITY,  
CHANDIGARH

```
Current Data Parameters
NAME      Nov23-2022
EXPNO    141
PROCNO   1

F2 - Acquisition Parameters
Date_    20221123
Time     20.51 h
INSTRUM  Avance Neo 500
PROBHD   Z119470_0333 (
PULPROG  zgpg30
TD        65536
SOLVENT  DMSO
NS        512
DS        4
SWH       37037.035 Hz
FIDRES    1.130281 Hz
AQ         0.8847360 sec
RG         101
DW         13.500 usec
DE         6.50 usec
TE         300.2 K
D1         2.00000000 sec
D11       0.03000000 sec
TD0        1
SF01       125.7804233 MHz
NUC1       13C
P0         3.33 usec
P1         10.00 usec
PLW1       83.14099884 W
SF02       500.1720007 MHz
NUC2       1H
CPDPRG[2] waltz65
PCPD2     80.00 usec
PLW2       20.93000031 W
PLW12     0.32703000 W
PLW13     0.16449000 W

F2 - Processing parameters
SI         32768
SF         125.7679211 MHz
WDW        EM
SSB        0
LB         1.00 Hz
GB         0
PC         1.40
```

## 11.5 MASS SPECTRA OF ISFB-5

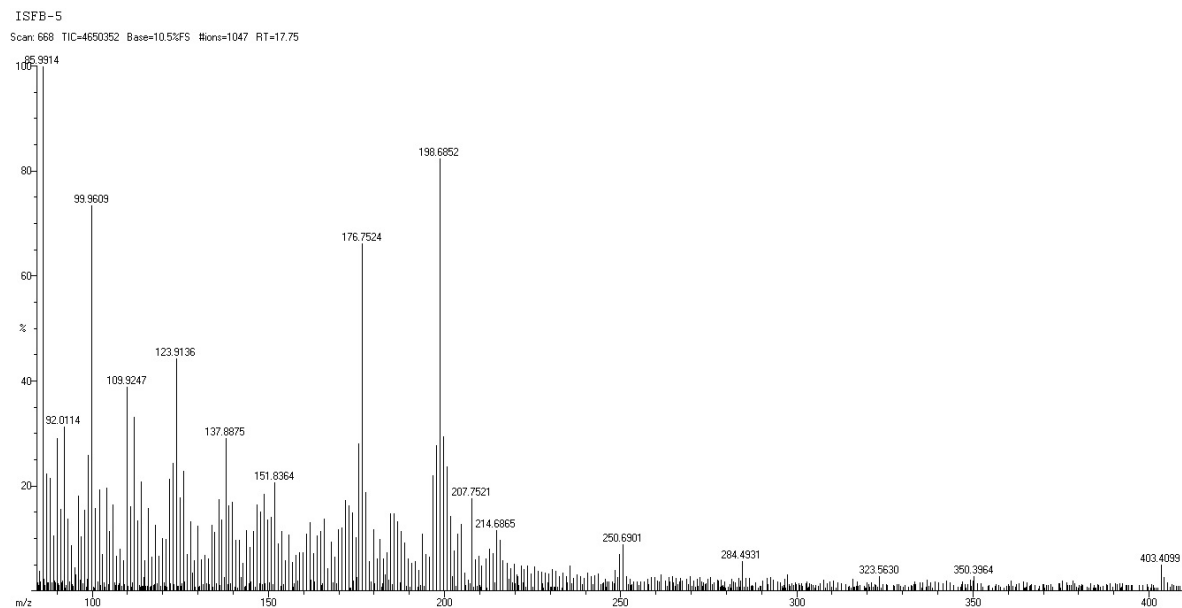

### 11.6 SPECTRAL INTERPRETATION:

*3-((4-((3-fluorobenzyl)oxy)benzylidene)hydrazineylidene)-5-methoxyindolin-2-one (ISFB5):*  
Brown, solid, 76%, melting point.  $195 \pm 2^\circ\text{C}$ .  $^1\text{H NMR}$  (500 MHz, DMSO- $d_6$ )  $\delta$ : 10.64 (s, 1H, NH), 8.61 (s, 1H, =CH-), 7.95-6.82 (m, 11H, ArH), 5.25 (s, 2H, -CH<sub>2</sub>-), 3.72 (s, 3H, -CH<sub>2</sub>-Ar).  $^{13}\text{C NMR}$  (500 MHz, DMSO- $d_6$ ) 164.62, 163.05, 161.34, 154.48, 150.83, 139.36, 138.37, 130.72, 126.27, 123.56, 118.68, 116.93, 115.54, 114.74, 111.22, 68.54, 55.29. Chemical formula  $\text{C}_{23}\text{H}_{18}\text{FN}_3\text{O}_3$ . EI- HRMS (m/z): Calculated-403.4099, Observed- 403.4057.



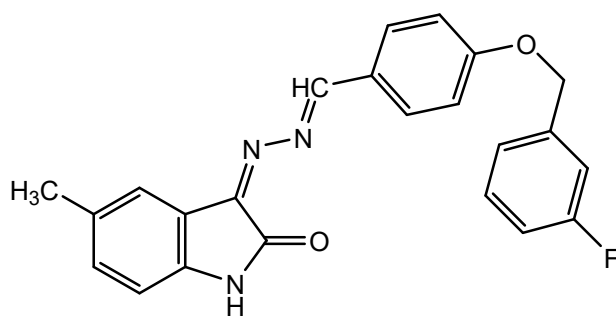

**Figure S12.** ISFB6 structure

12.1 TLC OF ISFB-6: Mobile phase is Hexane: ethyl acetate (70:30)

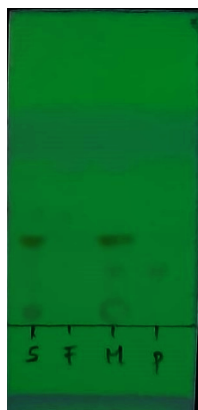

12.2 HPLC OF ISFB-6

**SHIMADZU LabSolutions Analysis Report**

**<Sample Information>**

Sample Name : isatin001  
 Sample ID : isfb6  
 Data Filename : fluoro and bb\_05-12-2022\_008.lcd  
 Method Filename : isatin.lcm  
 Batch Filename : fluoro and bb.lcb  
 Vial # : 1-7  
 Injection Volume : 20 uL  
 Date Acquired : 12/5/2022 2:30:53 AM  
 Date Processed : 12/6/2022 4:38:13 AM  
 Sample Type : Standard  
 Level : 1  
 Acquired by : System Administrator  
 Processed by : System Administrator

**<Chromatogram>**

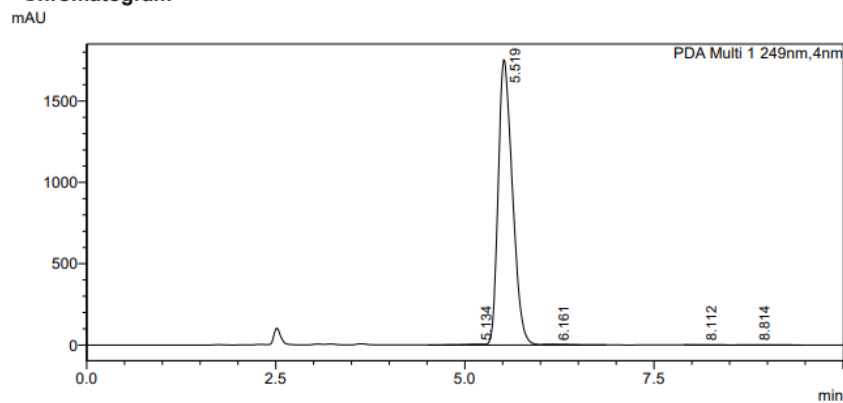

**<Peak Table>**

PDA Ch1 249nm

| Peak# | Ret. Time | Area     | Height  | Conc.  | Unit | Mark | Name |
|-------|-----------|----------|---------|--------|------|------|------|
| 1     | 5.134     | 95496    | 4313    | 0.412  |      |      |      |
| 2     | 5.519     | 23026214 | 1752400 | 99.437 |      | SV   |      |
| 3     | 6.161     | 17833    | 1371    | 0.077  |      | T    |      |
| 4     | 8.112     | 4803     | 293     | 0.021  |      |      |      |
| 5     | 8.814     | 12300    | 497     | 0.053  |      |      |      |
| Total |           | 23156646 | 1758873 |        |      |      |      |

### 12.3 <sup>1</sup>H NMR OF ISFB-6

ISFB-6  
1H\_8scan DMSO {D:\Spectra} nmr 15

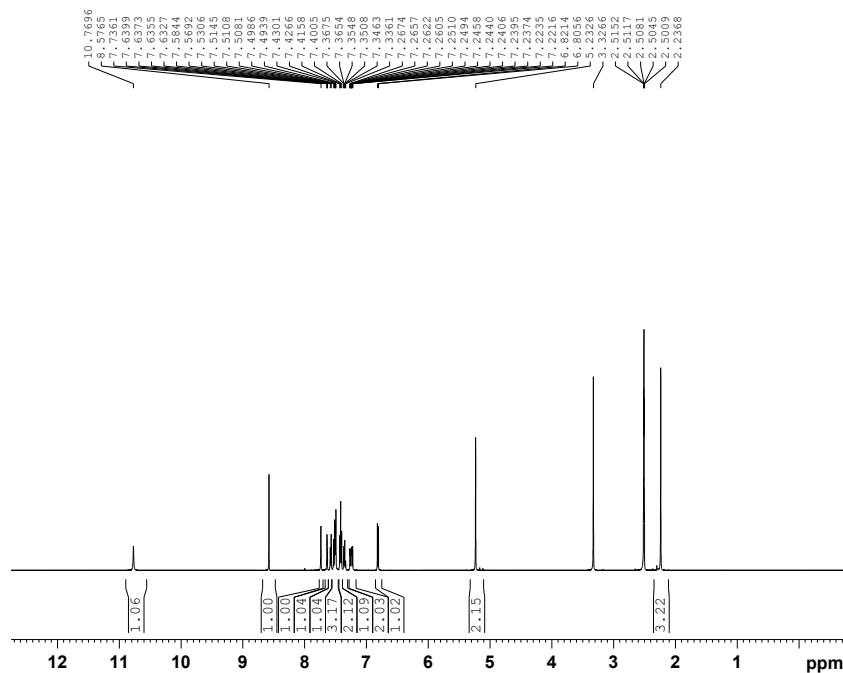

BRUKER  
AVANCE NEO  
500 MHz NMR  
SPECTROMETER  
SAIF, P.U.

Current Data Parameters  
NAME Nov23-2022  
EXPNO 150  
PROCNO 1

F2 - Acquisition Parameters  
Date\_ 20221123  
Time\_ 10.44 h  
INSTRUM Avance Neo 500  
PROBHD Z119470\_0333 (  
PULPROG zg30  
TD 65536  
SOLVENT DMSO  
NS 16  
DS 0  
SWH 14705.883 Hz  
FIDRES 0.448788 Hz  
AQ 2.2282240 sec  
RG 101  
DW 34.000 usec  
DE 6.79 usec  
TE 300.2 K  
D1 1.00000000 sec  
TD0 1  
SF01 500.1730885 MHz  
NUC1 1H  
PO 3.33 usec  
P1 10.00 usec  
PLW1 20.93000031 W

F2 - Processing parameters  
SI 65536  
SF 500.1700000 MHz  
WDW EM  
SSB 0  
LB 0.30 Hz  
GB 0  
PC 1.00

### 12.4 <sup>13</sup>C NMR OF ISFB-6

ISFB-6  
C13CPD DMSO {D:\Spectra} nmr 15

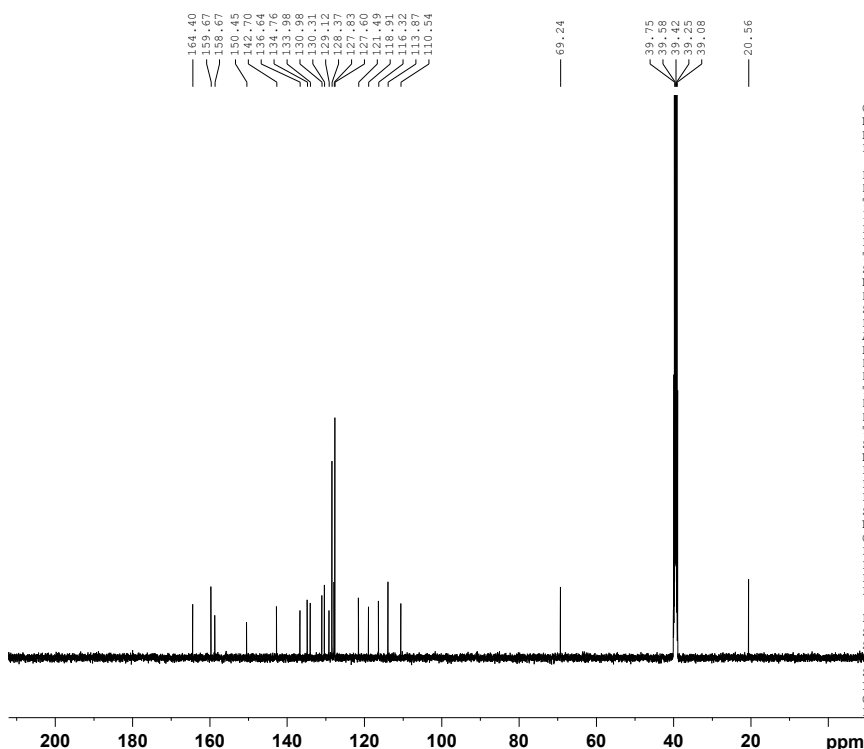

BRUKER  
AVANCE NEO  
500 MHz NMR SPECTROMETER  
SAIF, PANJAB UNIVERSITY,  
CHANDIGARH

Current Data Parameters  
NAME Nov23-2022  
EXPNO 151  
PROCNO 1

F2 - Acquisition Parameters  
Date\_ 20221123  
Time\_ 21.18 h  
INSTRUM Avance Neo 500  
PROBHD Z119470\_0333 (  
PULPROG zgpg30  
TD 65536  
SOLVENT DMSO  
NS 512  
DS 4  
SWH 37037.035 Hz  
FIDRES 1.130281 Hz  
AQ 0.8847360 sec  
RG 101  
DW 13.500 usec  
DE 6.50 usec  
TE 300.1 K  
D1 2.00000000 sec  
D11 0.03000000 sec  
TD0 1  
SF01 125.7804233 MHz  
NUC1 13C  
PO 3.33 usec  
P1 10.00 usec  
PLW1 83.14099884 W  
SF02 500.1720007 MHz  
NUC2 1H  
CPDPRG[2 waltz65  
PCPD2 80.00 usec  
PLW2 20.93000031 W  
PLW12 0.32703000 W  
PLW13 0.16449000 W

F2 - Processing parameters  
SI 32768  
SF 125.7679213 MHz  
WDW EM  
SSB 0  
LB 1.00 Hz  
GB 0  
PC 1.40

## 12.5 MASS SPECTRA OF ISFB-6

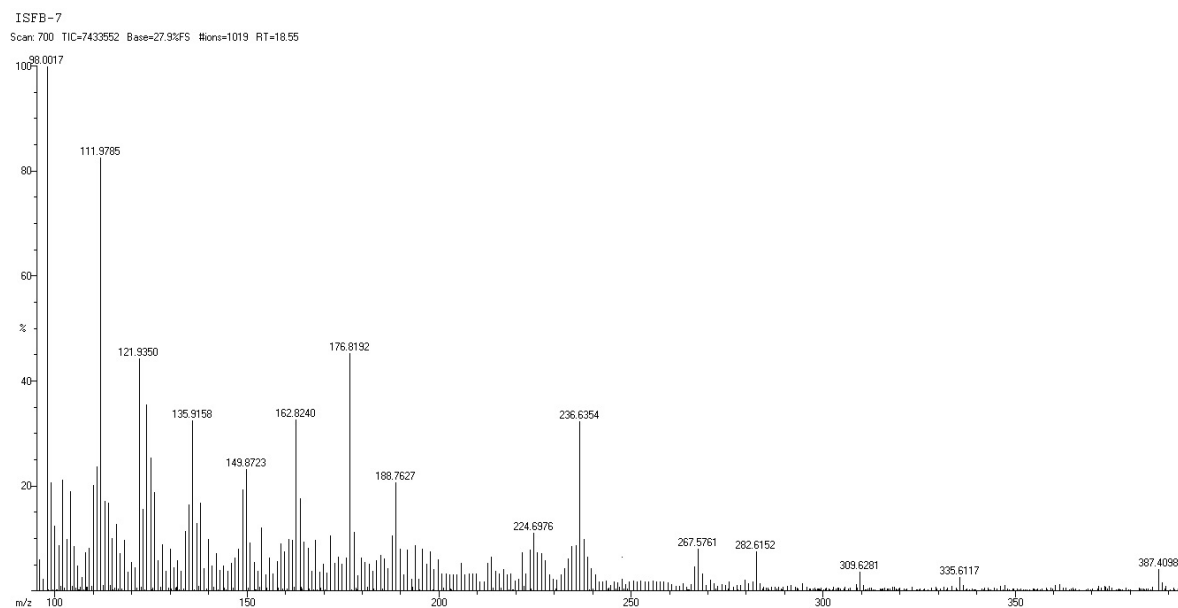

## 12.6 SPECTRAL INTERPRETATION

*3-((4-((3-fluorobenzyl)oxy)benzylidene)hydrazineylidene)-5-methylindolin-2-one* (**ISFB6**): Orange, solid, 88%, melting point.  $212 \pm 2^\circ\text{C}$ .  $^1\text{H NMR}$  (500 MHz, DMSO- $d_6$ )  $\delta$ : 10.76 (s, 1H, NH), 8.57 (s, 1H, =CH-), 7.73-6.80 (m, 11H, ArH), 5.23 (s, 2H, -CH<sub>2</sub>-), 2.23 (s, 3H, -CH<sub>2</sub>-Ar).  $^{13}\text{C NMR}$  (500 MHz, DMSO- $d_6$ ) 164.40, 169.67, 168.67, 160.48, 142.70, 136.64, 134.76, 133.96, 130.98, 129.12, 128.37, 127.60, 121.49, 118.91, 116.32, 113.87, 110.54, 69.24, 20.56. Chemical formula  $\text{C}_{23}\text{H}_{18}\text{FN}_3\text{O}_2$ . EI- HRMS (m/z): Calculated-387.4098, Observed- 387.4063.

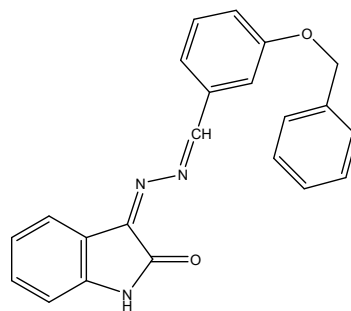

**Figure S13.** ISBB1 structure

13.1 TLC OF ISBB-1: Mobile phase is Hexane: ethyl acetate (70:30)

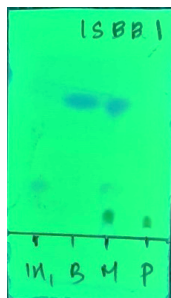

13.2 HPLC OF ISBB-1

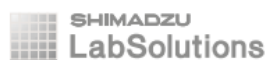

## Analysis Report

### <Sample Information>

|                  |                                    |              |                        |
|------------------|------------------------------------|--------------|------------------------|
| Sample Name      | : isatin001                        | Sample Type  | : Standard             |
| Sample ID        | : isbb1                            | Level        | : 1                    |
| Data Filename    | : fluoro and bb_05-12-2022_009.lcd | Acquired by  | : System Administrator |
| Method Filename  | : isatin.lcm                       | Processed by | : System Administrator |
| Batch Filename   | : fluoro and bb.lcb                |              |                        |
| Vial #           | : 1-8                              |              |                        |
| Injection Volume | : 20 uL                            |              |                        |
| Date Acquired    | : 12/5/2022 2:41:16 AM             |              |                        |
| Date Processed   | : 12/6/2022 4:41:09 AM             |              |                        |

### <Chromatogram>

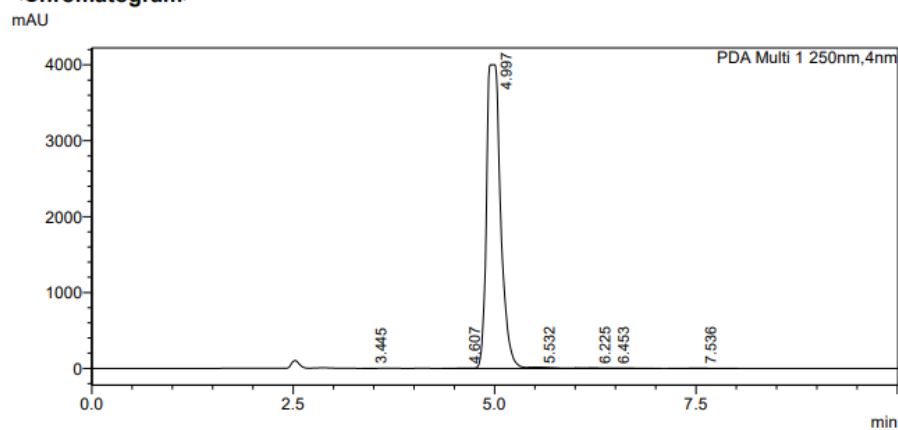

### <Peak Table>

| Peak# | Ret. Time | Area     | Height  | Conc.  | Unit | Mark | Name |
|-------|-----------|----------|---------|--------|------|------|------|
| 1     | 3.445     | 1931     | 228     | 0.004  |      |      |      |
| 2     | 4.607     | 6937     | 500     | 0.014  |      |      |      |
| 3     | 4.997     | 48906742 | 3999836 | 99.630 |      | SV   |      |
| 4     | 5.532     | 79091    | 7379    | 0.161  |      | T    |      |
| 5     | 6.225     | 51237    | 3427    | 0.104  |      | T    |      |
| 6     | 6.453     | 29557    | 2266    | 0.060  |      | TV   |      |
| 7     | 7.536     | 12683    | 558     | 0.026  |      |      |      |
| Total |           | 49088178 | 4014195 |        |      |      |      |

### 13.3 <sup>1</sup>H NMR OF ISBB-1

ISBB-1  
1H\_8scan DMSO {D:\Spectra} nmr 16

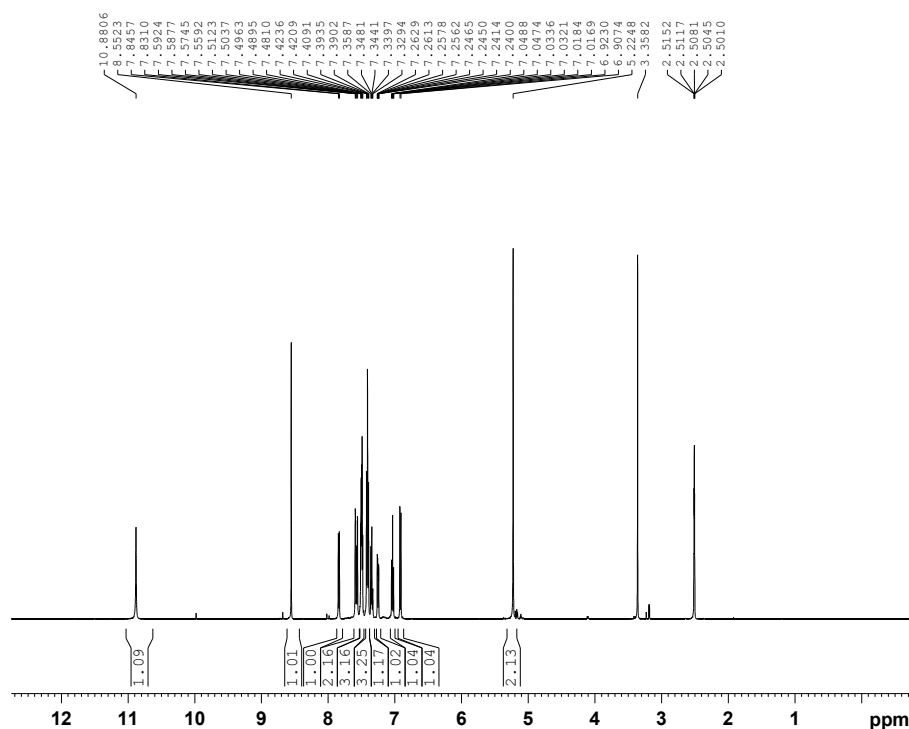

BRUKER  
AVANCE NEO  
500 MHz NMR  
SPECTROMETER  
SAIF, P.U.

Current Data Parameters  
NAME Nov23-2022  
EXPNO 160  
PROCNO 1

F2 - Acquisition Parameters  
Date\_ 20221123  
Time\_ 10.46 h  
INSTRUM Avance Neo 500  
PROBHD Z119470\_0333 (  
PULPROG zg30  
TD 65536  
SOLVENT DMSO  
NS 16  
DS 0  
SWH 14705.883 Hz  
FIDRES 0.448788 Hz  
AQ 2.2282240 sec  
RG 95.7854  
DW 34.000 usec  
DE 6.79 usec  
TE 300.2 K  
D1 1.00000000 sec  
TDO 1  
SFO1 500.1730885 MHz  
NUC1 1H  
P0 3.33 usec  
P1 10.00 usec  
PLW1 20.93000031 W

F2 - Processing parameters  
SI 65536  
SF 500.1700000 MHz  
WDW EM  
SSB 0  
LB 0.30 Hz  
GB 0  
FC 1.00

### 13.4 <sup>13</sup>C NMR OF ISBB-1

ISBB-1  
C13CPD DMSO {D:\Spectra} nmr 16

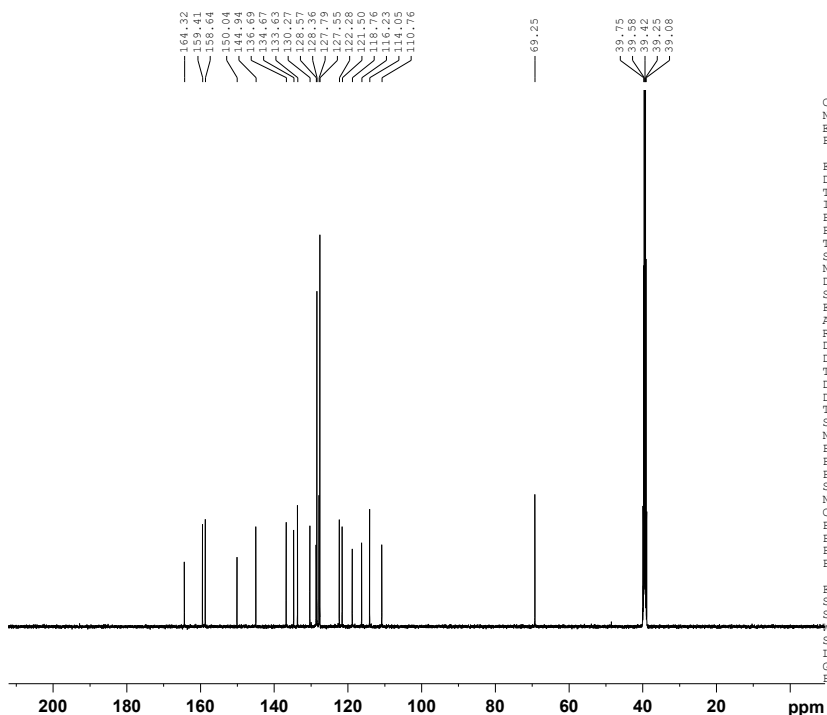

BRUKER  
AVANCE NEO  
500 MHz NMR SPECTROMETER  
SAIF, PANJAB UNIVERSITY,  
CHANDIGARH

Current Data Parameters  
NAME Nov23-2022  
EXPNO 161  
PROCNO 1

F2 - Acquisition Parameters  
Date\_ 20221123  
Time\_ 21.44 h  
INSTRUM Avance Neo 500  
PROBHD Z119470\_0333 (  
PULPROG zgpg30  
TD 65536  
SOLVENT DMSO  
NS 512  
DS 4  
SWH 37037.035 Hz  
FIDRES 1.130281 Hz  
AQ 0.8847360 sec  
RG 101  
DW 13.500 usec  
DE 6.50 usec  
TE 300.2 K  
D1 2.00000000 sec  
D11 0.03000000 sec  
TDO 1  
SFO1 125.7804233 MHz  
NUC1 13C  
P0 3.33 usec  
P1 10.00 usec  
PLW1 83.14099884 W  
SFO2 500.1720007 MHz  
NUC2 1H  
CPDPRG2 waltz65  
PCPD2 80.00 usec  
PLW2 20.93000031 W  
PLW12 0.32703000 W  
PLW13 0.16449000 W

F2 - Processing parameters  
SI 32768  
SF 125.7679210 MHz  
WDW EM  
SSB 0  
LB 1.00 Hz  
GB 0  
FC 1.40

### 13.5 MASS SPECTRA OF ISBB-1

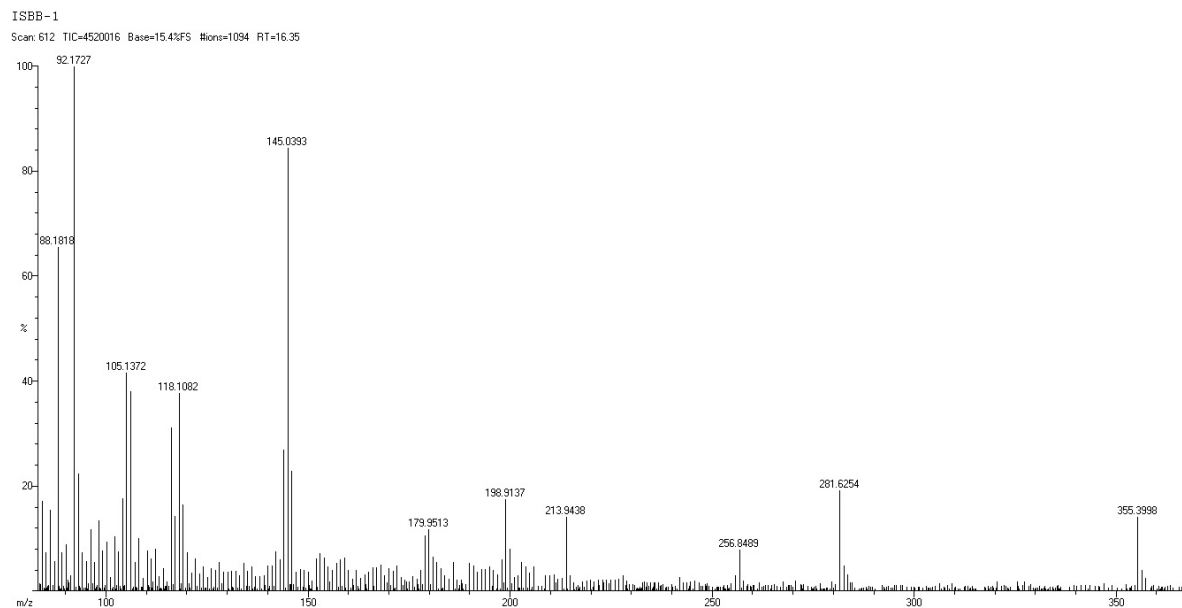

### 13.6 SPECTRAL INTERPRETATION:

*3-((3-(benzyloxy)benzylidene)hydrazineylidene)indolin-2-one (ISBB1):* Dark red, solid, 78%, melting point.  $228 \pm 2^\circ\text{C}$ .  $^1\text{H}$  NMR (500 MHz, DMSO- $d_6$ )  $\delta$ : 10.88 (s, 1H, NH), 8.55 (s, 1H, =CH-), 7.84-6.90 (m, 13H, ArH), 5.22 (s, 2H, -CH $_2$ -).  $^{13}\text{C}$  NMR (500 MHz, DMSO- $d_6$ )  $\delta$ : 164.32, 159.41, 158.64, 160.04, 144.94, 136.69, 134.37, 133.63, 130.27, 128.57, 127.79, 122.28, 121.80, 116.76, 114.06, 110.76, 69.28. Chemical formula  $\text{C}_{22}\text{H}_{17}\text{N}_3\text{O}_2$ . EI- HRMS (m/z): Calculated-355.3998, Observed- 355.3998.

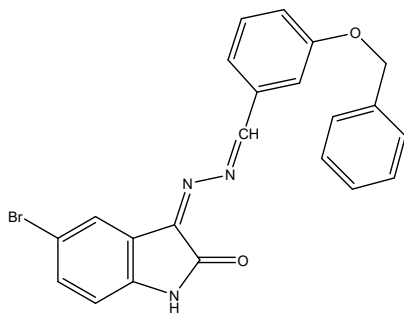

**Figure S14.** ISBB2 structure

14.1 TLC OF ISBB-2: Mobile phase is Hexane: ethyl acetate (70:30)

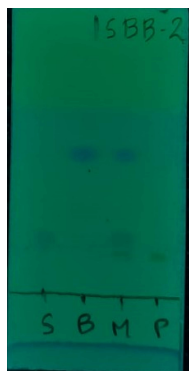

14.2 HPLC OF ISBB-2

<Sample Information>

```

Sample Name       : isatin001
Sample ID        : isbb2
Data Filename    : fluoro and bb_05-12-2022_010.lcd
Method Filename  : isatin.lcm
Batch Filename   : fluoro and bb.lcb
Vial #          : 1-9
Injection Volume : 20 uL
Date Acquired   : 12/5/2022 2:51:39 AM
Date Processed  : 12/6/2022 10:45:14 PM

Sample Type      : Standard
Level           : 1
Acquired by     : System Administrator
Processed by    : System Administrator
    
```

<Chromatogram>

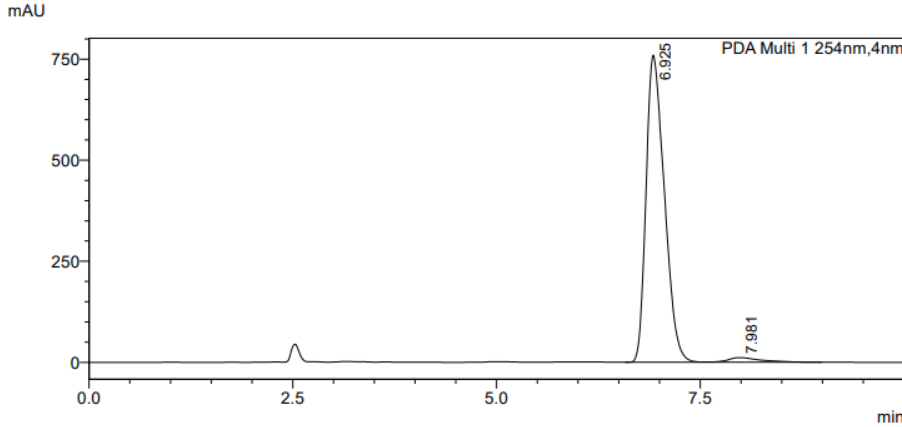

<Peak Table>

| Peak# | Ret. Time | Area     | Height | Conc.  | Unit | Mark | Name |
|-------|-----------|----------|--------|--------|------|------|------|
| 1     | 6.925     | 11885761 | 759058 | 97.327 |      |      |      |
| 2     | 7.981     | 326456   | 11494  | 2.673  |      | V    |      |
| Total |           | 12212217 | 770551 |        |      |      |      |

14.3 <sup>1</sup>H NMR OF ISBB-2

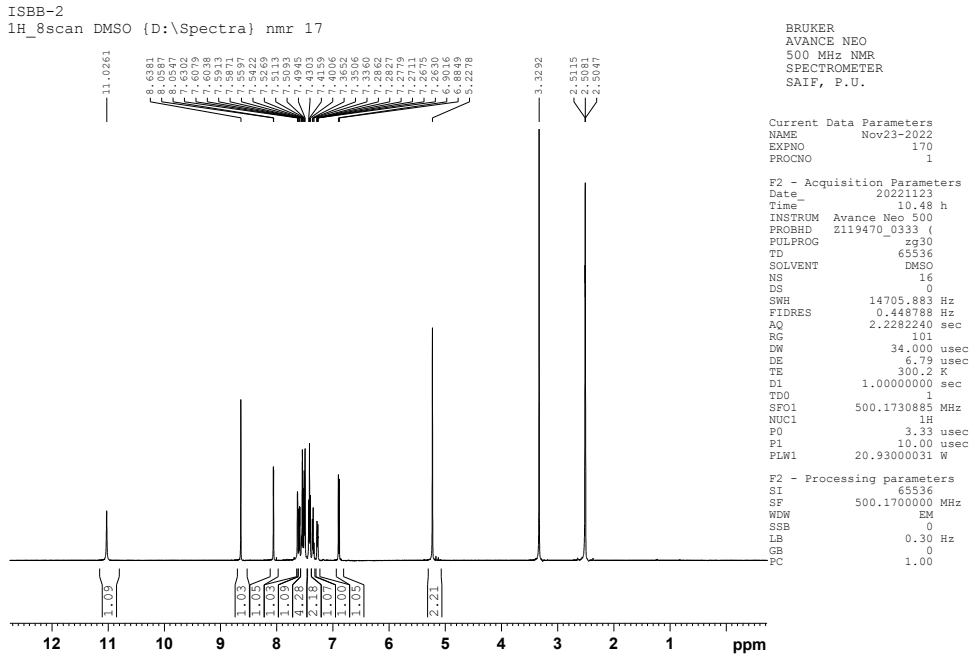

14.4 <sup>13</sup>C NMR OF ISBB-2



ISBB-2  
 C13CPD DMSO {D:\Spectra} nmr 17

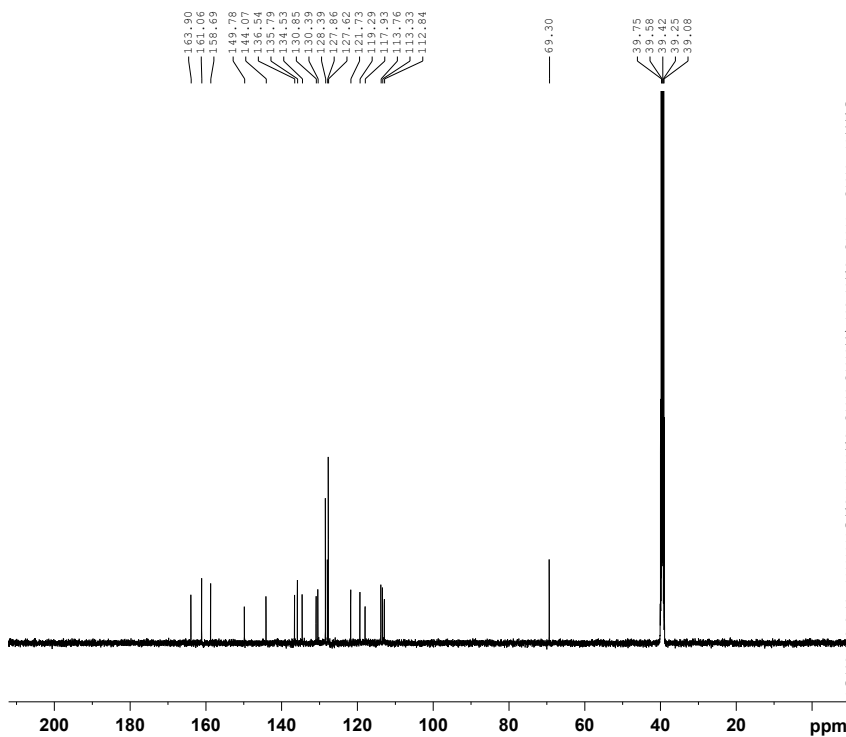

BRUKER  
 AVANCE NEO  
 500 MHz NMR SPECTROMETER  
 SAIF, PANJAB UNIVERSITY,  
 CHANDIGARH

Current Data Parameters  
 NAME Nov23-2022  
 EXPNO 171  
 PROCNO 1  
 F2 - Acquisition Parameters  
 Date\_ 20221123  
 Time 22.11 h  
 INSTRUM Avance Neo 500  
 PROBHD Z119470\_0333 ( )  
 PULPROG zgpg30  
 TD 65536  
 SOLVENT DMSO  
 NS 512  
 DS 4  
 SWH 37037.035 Hz  
 FIDRES 1.130281 Hz  
 AQ 0.8847360 sec  
 RG 101  
 DW 13.500 usec  
 DE 6.50 usec  
 TE 300.1 K  
 D1 2.00000000 sec  
 D11 0.03000000 sec  
 TD0 1  
 SF01 125.7804233 MHz  
 NUC1 13C  
 P0 3.33 usec  
 P1 10.00 usec  
 PLW1 83.14099984 W  
 SF02 500.1720007 MHz  
 NUC2 1H  
 CPDPRG2 waltz65  
 PCPD2 80.00 usec  
 PLW2 20.93000031 W  
 PLW12 0.32703000 W  
 PLW13 0.16449000 W  
 F2 - Processing parameters  
 SI 32768  
 SF 125.7679213 MHz  
 NDNW EM  
 SSB 0  
 LB 1.00 Hz  
 GB 0  
 FC 1.40

### 14.5 MASS SPECTRA OF ISBB-2

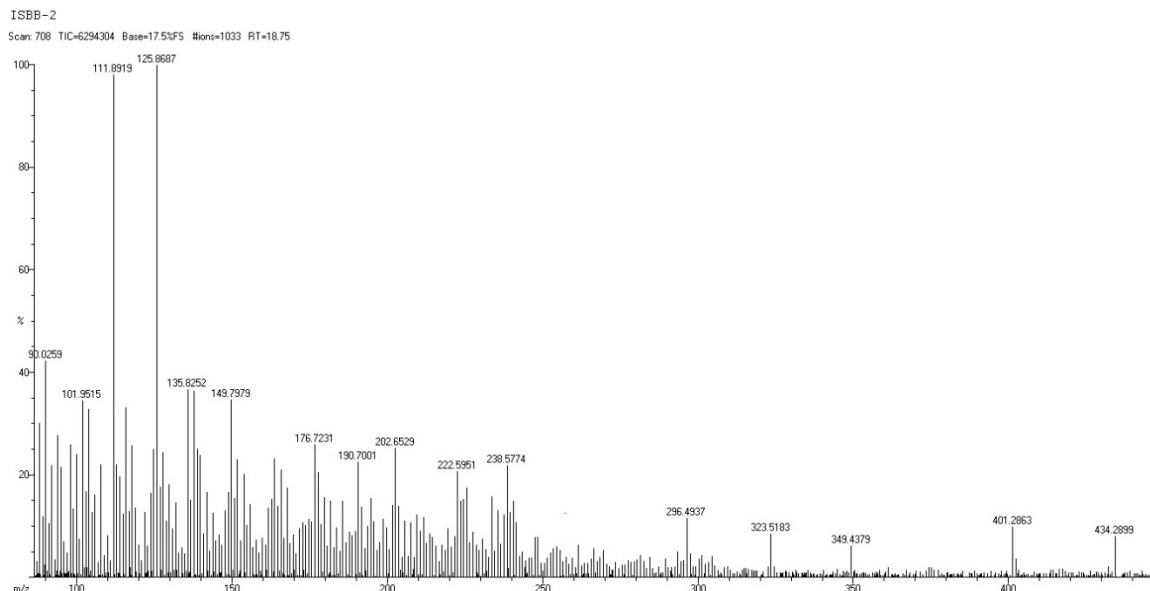

### 14.6 SPECTRAL INTERPRETATION:

*3-((3-(benzyloxy)benzylidene)hydrazineylidene)-5-bromoindolin-2-one (ISBB2)*: Orange, solid, 69%, melting point.  $235 \pm 2^\circ\text{C}$ .  $^1\text{H}$  NMR (500 MHz, DMSO- $d_6$ )  $\delta$ : 11.02 (s, 1H, NH), 8.63 (s, 1H, =CH-), 8.05-6.88 (m, 12H, ArH), 5.22 (s, 2H, -CH $_2$ -)  $^{13}\text{C}$  NMR (500 MHz, DMSO- $d_6$ ) 163.90, 161.06, 158.69, 149.78, 144.07, 136.64, 135.79, 134.53, 130.85, 128.39, 127.62, 121.62, 119.29, 117.93, 113.76, 112.84, 69.30. Chemical formula  $\text{C}_{22}\text{H}_{16}\text{BrN}_3\text{O}_2$ . EI- HRMS (m/z): Calculated-434.2899, Observed- 434.2853.

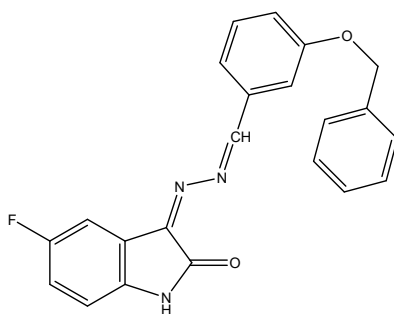

**Figure S15.** ISBB3 structure

15.1 TLC OF ISBB-3: Mobile phase is Hexane: ethyl acetate (70:30)

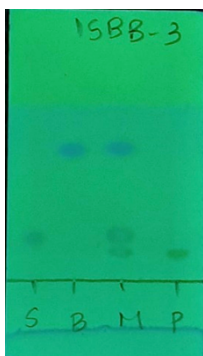

## 15.2 HPLC OF ISBB-3

# SHIMADZU LabSolutions Analysis Report

### <Sample Information>

Sample Name : isatin001  
 Sample ID : isbb3  
 Data Filename : fluoro and bb\_05-12-2022\_011.lcd  
 Method Filename : isatin.lcm  
 Batch Filename : fluoro and bb.lcb  
 Vial # : 1-10  
 Injection Volume : 20 uL  
 Date Acquired : 12/5/2022 3:02:02 AM  
 Date Processed : 12/6/2022 10:25:05 PM  
 Sample Type : Standard  
 Level : 1  
 Acquired by : System Administrator  
 Processed by : System Administrator

### <Chromatogram>

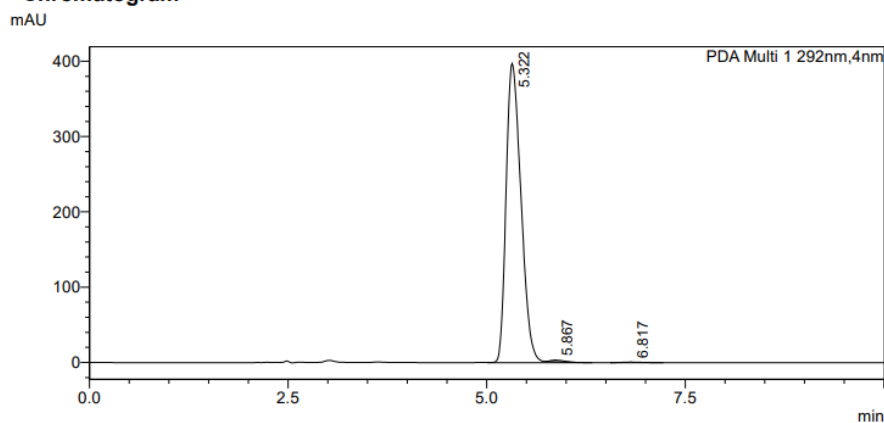

### <Peak Table>

PDA Ch1 292nm

| Peak# | Ret. Time | Area    | Height | Conc.  | Unit | Mark | Name |
|-------|-----------|---------|--------|--------|------|------|------|
| 1     | 5.322     | 5187349 | 397148 | 99.325 |      | SV   |      |
| 2     | 5.867     | 24549   | 2149   | 0.470  |      | T    |      |
| 3     | 6.817     | 10723   | 673    | 0.205  |      |      |      |
| Total |           | 5222621 | 399970 |        |      |      |      |

## 15.3 <sup>1</sup>H NMR OF ISBB-3

ISBB-3  
1H\_scan DMSO {D:\Spectra} nmr 18

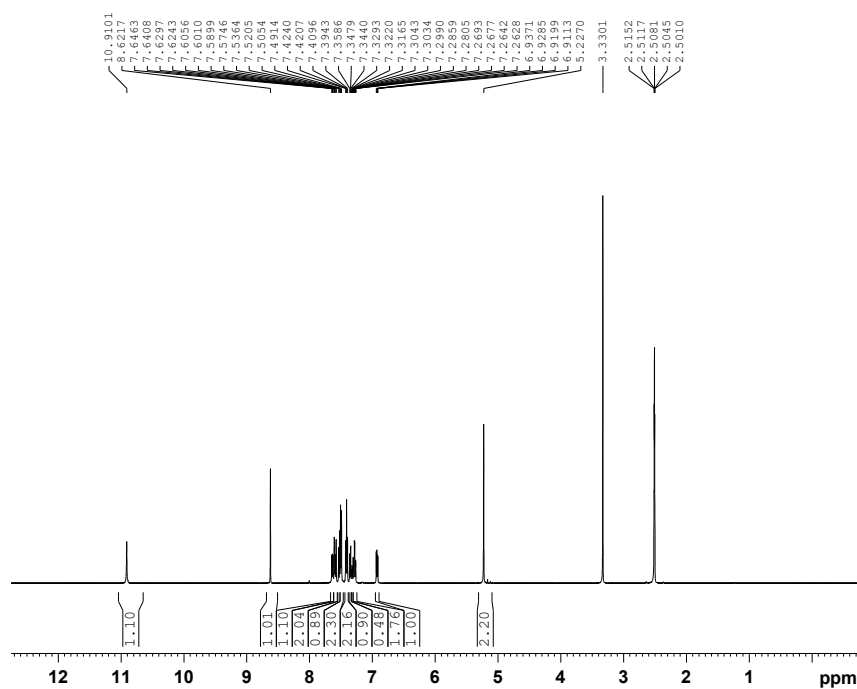

BRUKER  
AVANCE NEO  
500 MHz NMR  
SPECTROMETER  
SAIF, P.U.

Current Data Parameters  
NAME Nov23-2022  
EXFNO 180  
PROCNO 1

F2 - Acquisition Parameters  
Date\_ 20221123  
Time\_ 10.51 h  
INSTRUM Avance Neo 500  
PROBHD Z119470\_0333 ( )  
PULPROG zg30  
TD 65536  
SOLVENT DMSO  
NS 16  
DS 0  
SWH 14705.883 Hz  
FIDRES 0.448788 Hz  
AQ 2.2282240 sec  
RG 101  
DW 34.000 usec  
DE 6.79 usec  
TE 300.2 K  
D1 1.00000000 sec  
TD0 1  
SF01 500.1730885 MHz  
NUC1 1H  
P0 3.33 usec  
P1 10.00 usec  
PLW1 20.93000031 W

F2 - Processing parameters  
SI 65536  
SF 500.1700000 MHz  
WDW EM  
SSB 0  
LB 0.30 Hz  
GB 0  
PC 1.00

### 15.4 <sup>13</sup>C NMR OF ISBB-3

ISBB-3  
C13CPD DMSO {D:\Spectra} nmr 18

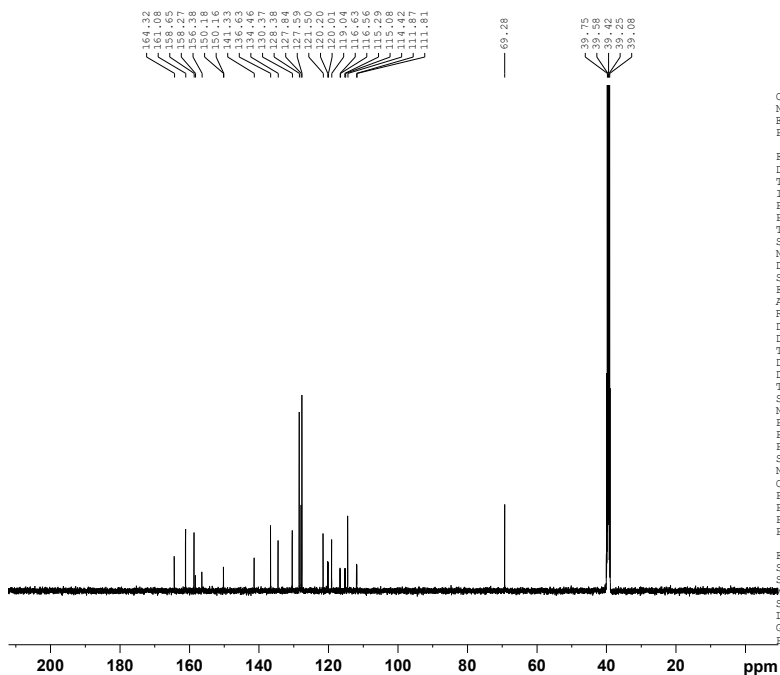

BRUKER  
AVANCE NEO  
500 MHz NMR SPECTROMETER  
SAIF, PANJAB UNIVERSITY,  
CHANDIGARH

Current Data Parameters  
NAME Nov23-2022  
EXFNO 181  
PROCNO 1

F2 - Acquisition Parameters  
Date\_ 20221123  
Time\_ 22.38 h  
INSTRUM Avance Neo 500  
PROBHD Z119470\_0333 ( )  
PULPROG zgpg30  
TD 65536  
SOLVENT DMSO  
NS 512  
DS 4  
SWH 37037.035 Hz  
FIDRES 1.130281 Hz  
AQ 0.8847360 sec  
RG 101  
DW 13.500 usec  
DE 6.50 usec  
TE 300.2 K  
D1 2.00000000 sec  
D11 0.03000000 sec  
TD0 1  
SF01 125.7804233 MHz  
NUC1 13C  
P0 3.33 usec  
P1 10.00 usec  
PLW1 83.14099884 W  
SF02 500.1720007 MHz  
NUC2 1H  
CPDPRG2 waltz65  
PCPD2 80.00 usec  
PLW2 20.93000031 W  
PLW12 0.32703000 W  
PLW13 0.16449000 W

F2 - Processing parameters  
SI 32768  
SF 125.7679210 MHz  
WDW EM  
SSB 0  
LB 1.00 Hz  
GB 0  
PC 1.40

### 15.5 MASS SPECTRUM OF ISBB-3

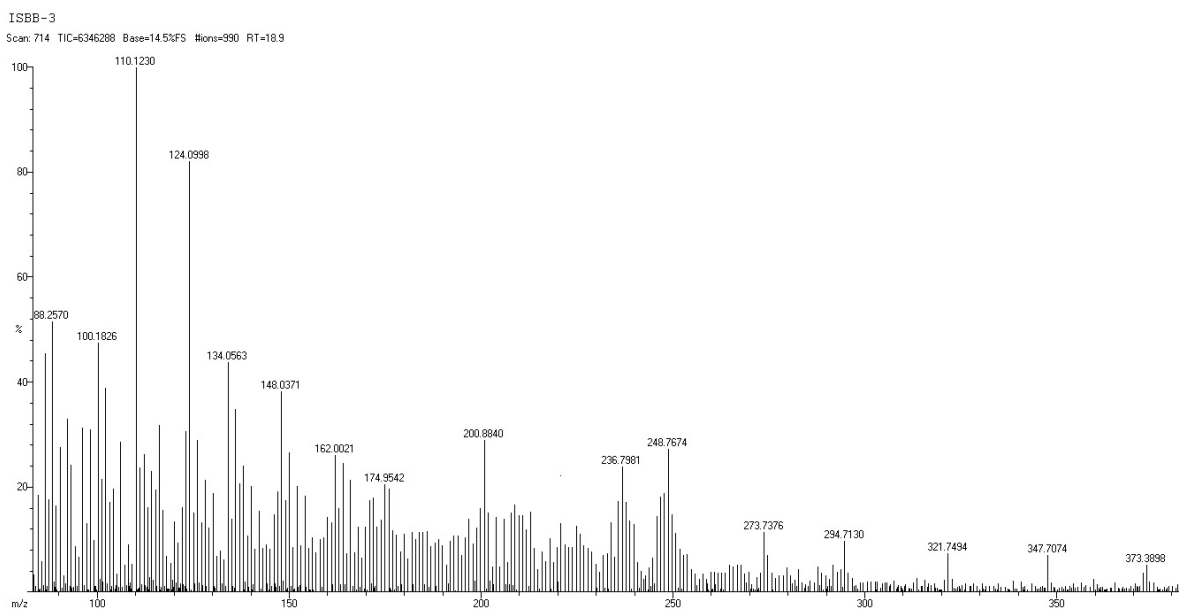

## 15.6 SPECTRAL INTERPRETATION

3-((3-(benzyloxy)benzylidene)hydrazineylidene)-5-fluorindolin-2-one (**ISBB3**): Orange, solid, 86%, melting point.  $210 \pm 2^\circ\text{C}$ .  $^1\text{H}$  NMR (500 MHz, DMSO- $d_6$ )  $\delta$ : 11.02 (s, 1H, NH), 8.63 (s, 1H, =CH-), 8.05-6.88 (m, 12H, ArH), 5.22 (s, 2H, -CH<sub>2</sub>-).  $^{13}\text{C}$  NMR (500 MHz, DMSO- $d_6$ ) 164.32, 161.08, 158.68, 156.38, 150.18, 141.33, 136.63, 134.46, 130.37, 128.38, 127.64, 121.50, 120.20, 119.04, 116.63, 115.29, 114.42, 111.87, 69.28. Chemical formula C<sub>22</sub>H<sub>16</sub>FN<sub>3</sub>O<sub>2</sub>. EI- HRMS (m/z): Calculated-373.3898, Observed- 373.3898.

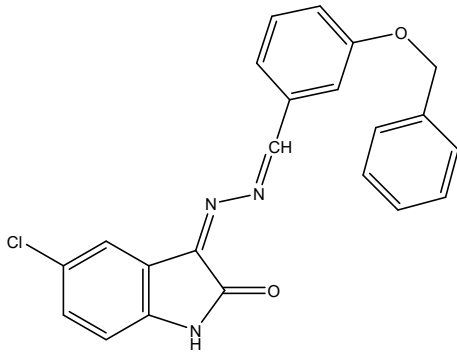

**Figure S11.** ISBB4 structure

16.1 TLC OF ISBB-4: Mobile phase is Hexane: ethyl acetate (70:30)

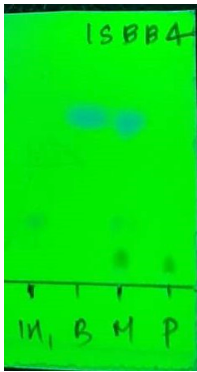

16.2 HPLC OF ISBB-4

SHIMADZU LabSolutions Analysis Report

<Sample Information>

Sample Name : isatin001  
 Sample ID : isbb4  
 Data Filename : fluoro and bb\_05-12-2022\_012.lcd  
 Method Filename : isatin.lcm  
 Batch Filename : fluoro and bb.lcb  
 Vial # : 1-11  
 Injection Volume : 20 uL  
 Date Acquired : 12/5/2022 3:12:23 AM  
 Date Processed : 12/6/2022 10:28:55 PM  
 Sample Type : Standard  
 Level : 1  
 Acquired by : System Administrator  
 Processed by : System Administrator

<Chromatogram>

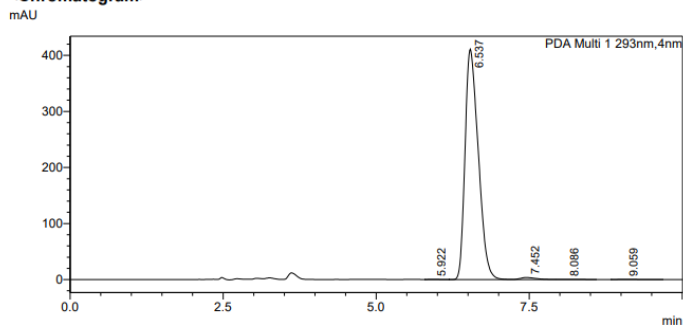

<Peak Table>

| Peak# | Ret. Time | Area    | Height | Conc.  | Unit | Mark | Name |
|-------|-----------|---------|--------|--------|------|------|------|
| 1     | 5.922     | 1629    | 151    | 0.026  |      |      |      |
| 2     | 6.537     | 6186172 | 411063 | 98.701 |      |      |      |
| 3     | 7.452     | 66173   | 3677   | 1.056  |      | V    |      |
| 4     | 8.086     | 8112    | 374    | 0.129  |      | V    |      |
| 5     | 9.059     | 5478    | 256    | 0.087  |      |      |      |
| Total |           | 6267564 | 415521 |        |      |      |      |

### 16.3 <sup>1</sup>H NMR OF ISBB-4

ISBB-4

<sup>1</sup>H\_8scan DMSO {D:\Spectra} nmr 19

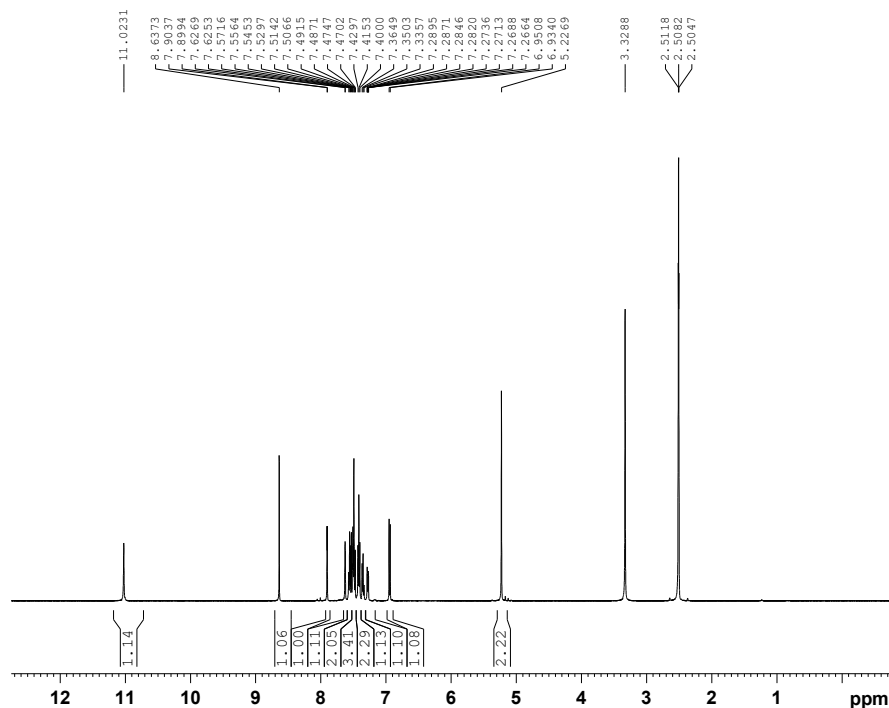

BRUKER  
AVANCE NEO  
500 MHz NMR  
SPECTROMETER  
SAIF, P.U.

Current Data Parameters  
NAME Nov23-2022  
EXPNO 190  
PROCNO 1

F2 - Acquisition Parameters  
Date\_ 20221123  
Time 10.53 h  
INSTRUM Avance Neo 500  
PROBHD z119470\_0333 (  
PULPROG zg30  
TD 65536  
SOLVENT DMSO  
NS 16  
DS 0  
SWH 14705.883 Hz  
FIDRES 0.448788 Hz  
AQ 2.2282240 sec  
RG 101  
DW 34.000 usec  
DE 6.79 usec  
TE 300.2 K  
D1 1.00000000 sec  
TD0 1  
SFO1 500.1730885 MHz  
NUC1 1H  
P0 3.33 usec  
P1 10.00 usec  
PLW1 20.93000031 W

F2 - Processing parameters  
SI 65536  
SF 500.1700000 MHz  
WDW EM  
SSB 0  
LB 0.30 Hz  
GB 0  
PC 1.00

### 16.4 <sup>13</sup>C NMR OF ISBB-4

ISBB-4

<sup>13</sup>C13CPD DMSO {D:\Spectra} nmr 19

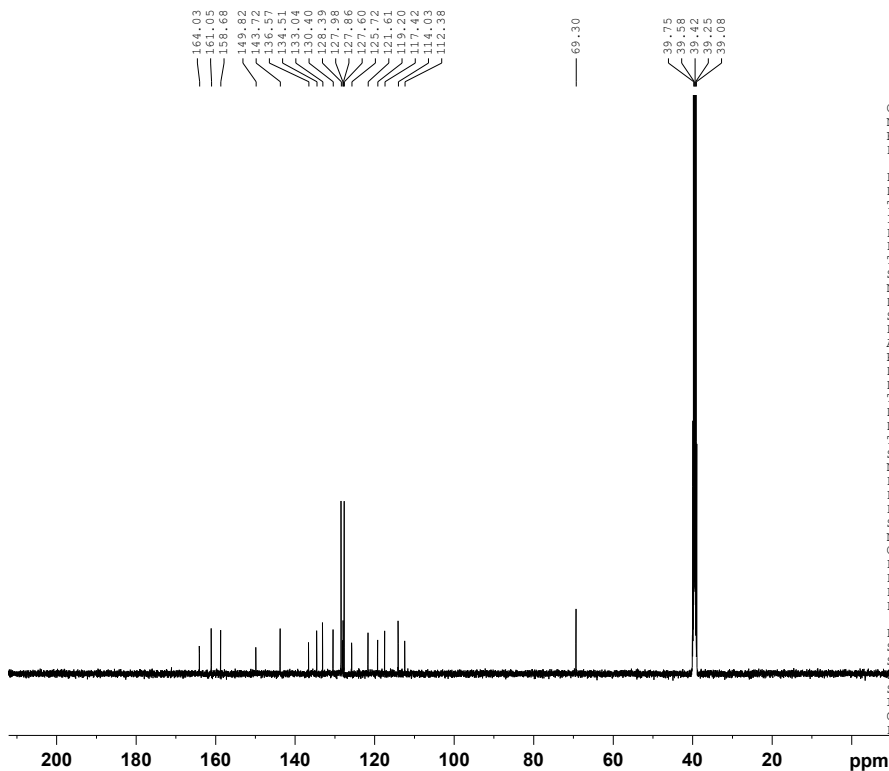

BRUKER  
AVANCE NEO  
500 MHz NMR SPECTROMETER  
SAIF, PANJAB UNIVERSITY,  
CHANDIGARH

Current Data Parameters  
NAME Nov23-2022  
EXPNO 191  
PROCNO 1

F2 - Acquisition Parameters  
Date\_ 20221123  
Time 23.05 h  
INSTRUM Avance Neo 500  
PROBHD z119470\_0333 (  
PULPROG zgpg30  
TD 65536  
SOLVENT DMSO  
NS 512  
DS 4  
SWH 37037.035 Hz  
FIDRES 1.130281 Hz  
AQ 0.8847360 sec  
RG 101  
DW 13.500 usec  
DE 6.50 usec  
TE 300.2 K  
D1 2.00000000 sec  
D11 0.03000000 sec  
TD0 1  
SFO1 125.7804233 MHz  
NUC1 13C  
P0 3.33 usec  
P1 10.00 usec  
PLW1 83.14099884 W  
SFO2 500.1720007 MHz  
NUC2 1H  
CPDPRG2 waltz65  
PCPD2 80.00 usec  
PLW2 20.93000031 W  
PLW12 0.32703000 W  
PLW13 0.16449000 W

F2 - Processing parameters  
SI 32768  
SF 125.7679212 MHz  
WDW EM  
SSB 0  
LB 1.00 Hz  
GB 0  
PC 1.40

## 16.5 MASS SPECTRA OF ISBB-4

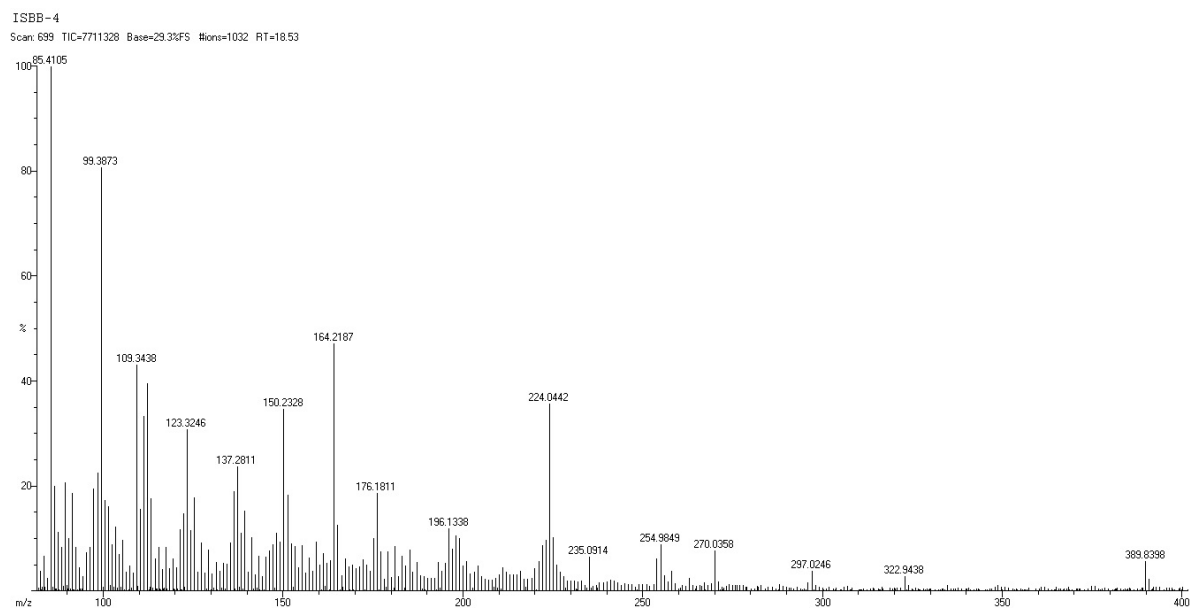

## 16.6 SPECTRAL INTERPRETATION

*3-((3-(benzyloxy)benzylidene)hydrazineylidene)-5-chloroindolin-2-one (ISBB4)*: Orange, solid, 84%, melting point.  $240 \pm 2^\circ\text{C}$ .  $^1\text{H}$  NMR (500 MHz, DMSO- $d_6$ )  $\delta$ : 11.02 (s, 1H, NH), 8.63 (s, 1H, =CH-), 7.90-6.93 (m, 12H, ArH), 5.22 (s, 2H, -CH<sub>2</sub>-)  $^{13}\text{C}$  NMR (500 MHz, DMSO- $d_6$ ) 164.03, 161.05, 158.68, 149.82, 143.72, 136.67, 134.51, 133.04, 130.40, 128.39, 127.98, 126.72, 121.61, 119.20, 117.42, 114.03, 112.36, 69.30. Chemical formula  $\text{C}_{22}\text{H}_{16}\text{ClN}_3\text{O}_2$ . EI- HRMS (m/z): Calculated-389.8398, Observed- 389.8343.



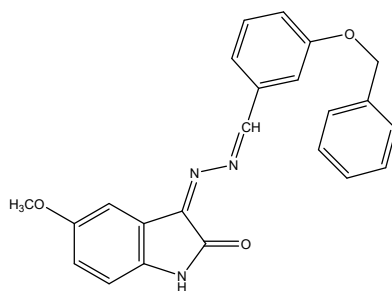

**Figure S17.** ISBB5 structure

17.1 TLC OF ISBB-5: Mobile phase is Hexane: ethyl acetate (70:30)

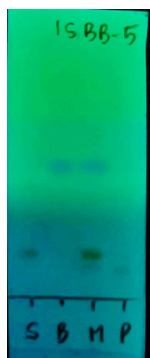

17.2 HPLC OF ISBB-5

**SHIMADZU LabSolutions Analysis Report**

**<Sample Information>**

Sample Name : isatin001  
 Sample ID : isbb5  
 Data Filename : fluoro and bb\_05-12-2022\_013.lcd  
 Method Filename : isatin.lcm  
 Batch Filename : fluoro and bb.lcb  
 Vial # : 1-12  
 Injection Volume : 20 uL  
 Date Acquired : 12/5/2022 3:22:44 AM  
 Date Processed : 12/6/2022 10:32:39 PM  
 Sample Type : Standard  
 Level : 1  
 Acquired by : System Administrator  
 Processed by : System Administrator

**<Chromatogram>**

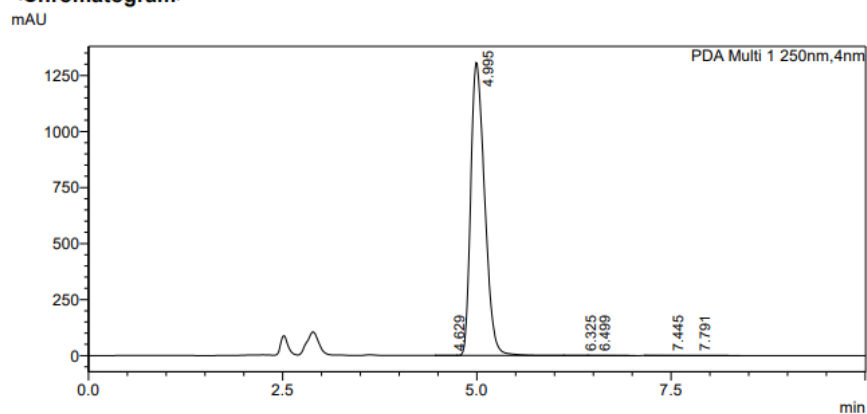

**<Peak Table>**

| Peak# | Ret. Time | Area     | Height  | Conc.  | Unit | Mark | Name |
|-------|-----------|----------|---------|--------|------|------|------|
| 1     | 4.629     | 1507     | 161     | 0.009  |      |      |      |
| 2     | 4.995     | 16269042 | 1306541 | 99.815 |      | V    |      |
| 3     | 6.325     | 4976     | 433     | 0.031  |      |      |      |
| 4     | 6.499     | 7545     | 537     | 0.046  |      | V    |      |
| 5     | 7.445     | 7884     | 340     | 0.048  |      |      |      |
| 6     | 7.791     | 8321     | 429     | 0.051  |      | V    |      |
| Total |           | 16299275 | 1308441 |        |      |      |      |

### 17.3 <sup>1</sup>H NMR OF 1SBB-5

ISBB-5  
1H\_scan DMSO {D:\Spectra} nmr 20

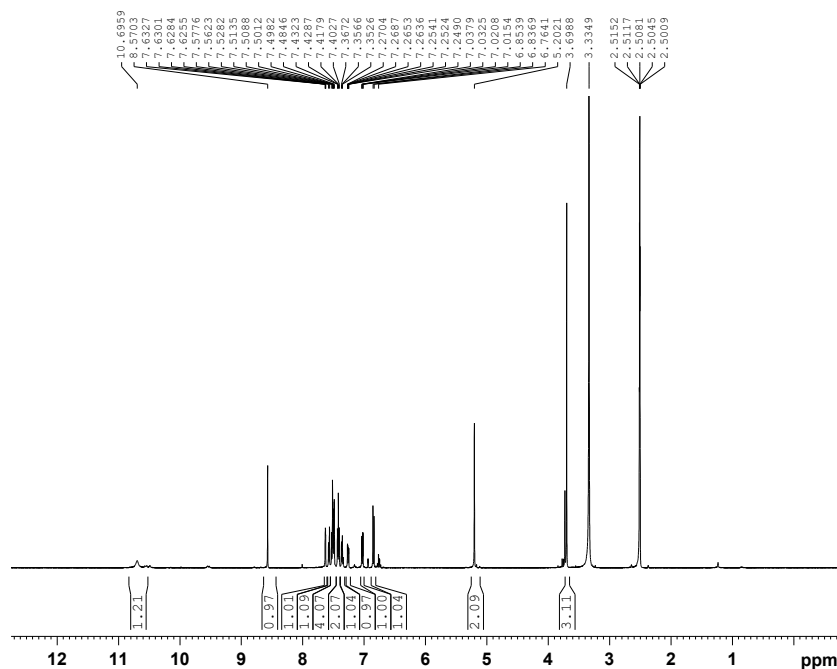

BRUKER  
AVANCE NEO  
500 MHz NMR  
SPECTROMETER  
SAIF, P. U.

Current Data Parameters  
NAME Nov23-2022  
EXPNO 200  
PROCNO 1

F2 - Acquisition Parameters  
Date\_ 20221123  
Time\_ 10.55 h  
INSTRUM Avance Neo 500  
PROBHD Z119470\_0333 (  
PULPROG zg30  
TD 65536  
SOLVENT DMSO  
NS 16  
DS 0  
SWH 14705.883 Hz  
FIDRES 0.448788 Hz  
AQ 2.2282240 sec  
RG 101  
DW 34.000 usec  
DE 6.79 usec  
TE 300.2 K  
D1 1.00000000 sec  
TD0 1  
SFO1 500.1730885 MHz  
NUC1 1H  
P0 3.33 usec  
P1 10.00 usec  
PLW1 20.93000031 W

F2 - Processing parameters  
SI 65536  
SF 500.1700000 MHz  
WDW EM  
SSB 0  
LB 0.30 Hz  
GB 0  
PC 1.00

### 17.4 <sup>13</sup>C NMR OF ISBB-5

ISBB-5  
C13CPD DMSO {D:\Spectra} nmr 20

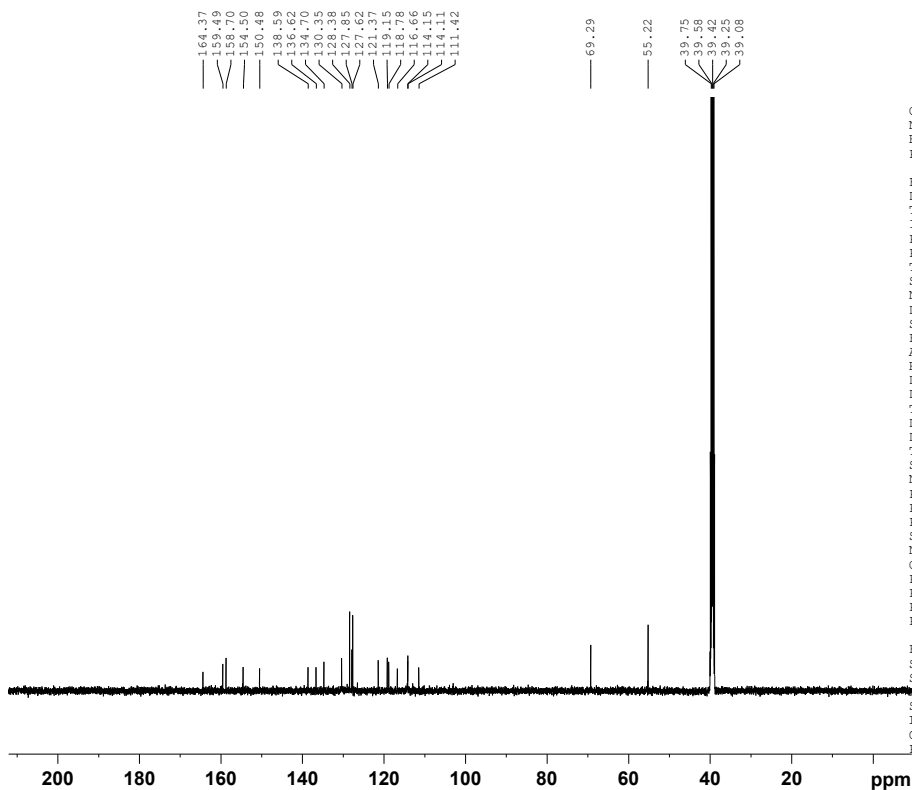

BRUKER  
AVANCE NEO  
500 MHz NMR SPECTROMETER  
SAIF, PANJAB UNIVERSITY,  
CHANDIGARH

Current Data Parameters  
NAME Nov23-2022  
EXPNO 201  
PROCNO 1

F2 - Acquisition Parameters  
Date\_ 20221123  
Time\_ 23.32 h  
INSTRUM Avance Neo 500  
PROBHD Z119470\_0333 (  
PULPROG zgpg30  
TD 65536  
SOLVENT DMSO  
NS 512  
DS 4  
SWH 37037.035 Hz  
FIDRES 1.130281 Hz  
AQ 0.8847360 sec  
RG 101  
DW 13.500 usec  
DE 6.50 usec  
TE 300.1 K  
D1 2.00000000 sec  
D11 0.03000000 sec  
TD0 1  
SFO1 125.7804233 MHz  
NUC1 13C  
P0 3.33 usec  
P1 10.00 usec  
PLW1 83.14099884 W  
SFO2 500.1720007 MHz  
NUC2 1H  
CPDPRG2 waltz65  
PCPD2 80.00 usec  
PLW2 20.93000031 W  
PLW12 0.32703000 W  
PLW13 0.16449000 W

F2 - Processing parameters  
SI 32768  
SF 125.7679198 MHz  
WDW EM  
SSB 0  
LB 1.00 Hz  
GB 0  
PC 1.40

## 17.5 MASS SPECTRA OF ISBB-5

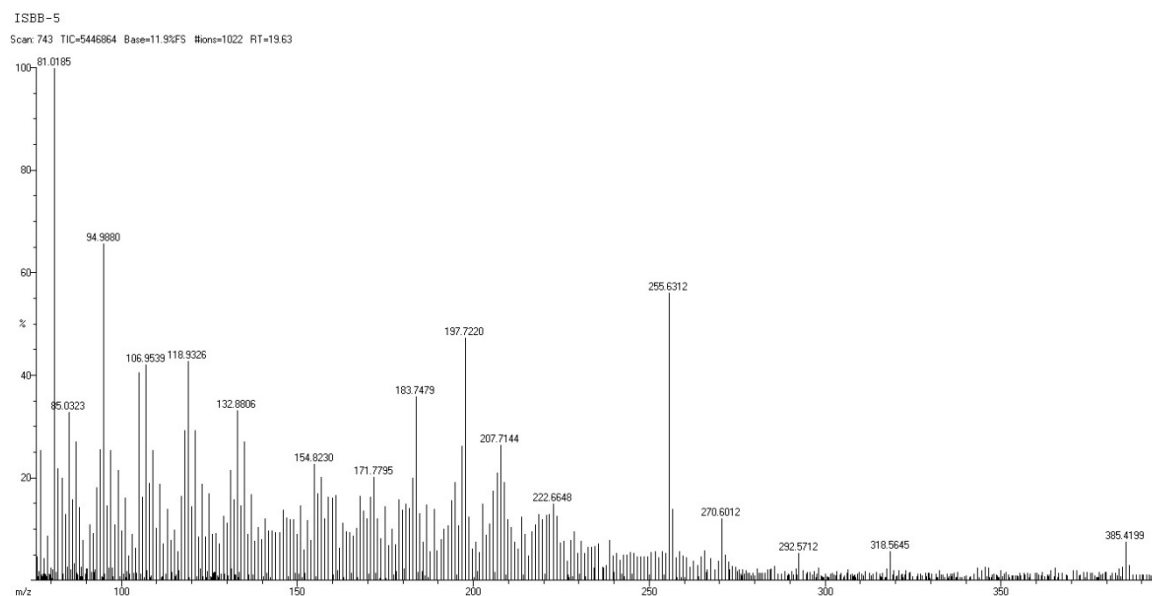

## 17.6 SPECTRAL INTERPRETATION

*3-((3-(benzyloxy)benzylidene)hydrazineylidene)-5-methoxyindolin-2-one (ISBB5)*: Dark brown, solid, 68%, melting point.  $218 \pm 2^\circ\text{C}$ .  $^1\text{H NMR}$  (500 MHz, DMSO- $d_6$ )  $\delta$ : 10.69 (s, 1H, NH), 8.57 (s, 1H, =CH-), 7.63-6.76(m, 12H, Ar-H), 5.20 (s, 2H, -CH<sub>2</sub>-), 3.69 (s, 3H, -CH<sub>2</sub>-Ar).  $^{13}\text{C NMR}$  (500 MHz, DMSO- $d_6$ ) 164.37, 159.49, 158.70, 154.80, 150.48, 138.89, 136.62, 134.70, 130.36, 128.36, 127.85, 121.37, 119.18, 118.78, 116.66, 114.15, 111.42, 69.29, 55.22. Chemical formula C<sub>23</sub>H<sub>19</sub>N<sub>3</sub>O<sub>3</sub>. EI- HRMS (m/z): Calculated-385.4199, Observed- 385.4152.

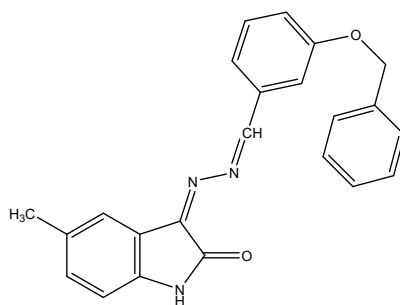

**Figure S18.** ISBB6 structure

18.1 TLC OF ISBB-6: Mobile phase is Hexane: ethyl acetate (70:30)

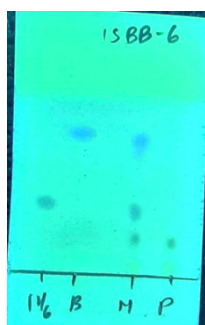

18.2 HPLC OF ISBB-6

**SHIMADZU LabSolutions Analysis Report**

**<Sample Information>**

|                  |                                    |              |                        |
|------------------|------------------------------------|--------------|------------------------|
| Sample Name      | : isatin001                        | Sample Type  | : Standard             |
| Sample ID        | : isbb6                            | Level        | : 1                    |
| Data Filename    | : fluoro and bb_05-12-2022_014.lcd | Acquired by  | : System Administrator |
| Method Filename  | : isatin.lcm                       | Processed by | : System Administrator |
| Batch Filename   | : fluoro and bb.lcb                |              |                        |
| Vial #           | : 1-13                             |              |                        |
| Injection Volume | : 20 uL                            |              |                        |
| Date Acquired    | : 12/5/2022 3:33:06 AM             |              |                        |
| Date Processed   | : 12/6/2022 10:35:15 PM            |              |                        |

**<Chromatogram>**

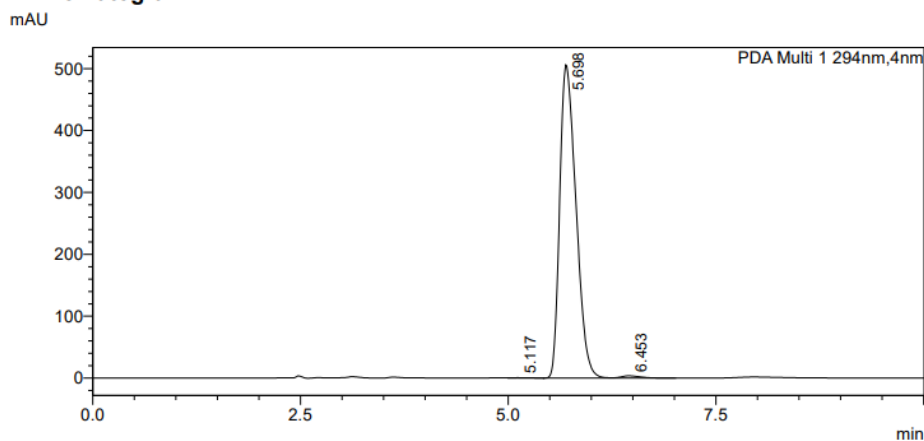

**<Peak Table>**

| PDA Ch1 294nm |           |         |        |        |      |      |      |
|---------------|-----------|---------|--------|--------|------|------|------|
| Peak#         | Ret. Time | Area    | Height | Conc.  | Unit | Mark | Name |
| 1             | 5.117     | 7527    | 509    | 0.108  |      |      |      |
| 2             | 5.698     | 6879649 | 505641 | 99.070 |      | V    |      |
| 3             | 6.453     | 57057   | 3639   | 0.822  |      | V    |      |
| Total         |           | 6944233 | 509789 |        |      |      |      |

### 18.3 <sup>1</sup>H NMR OF ISBB-6

ISBB-6  
1H\_8scan DMSO {D:\Spectra} nmr 21

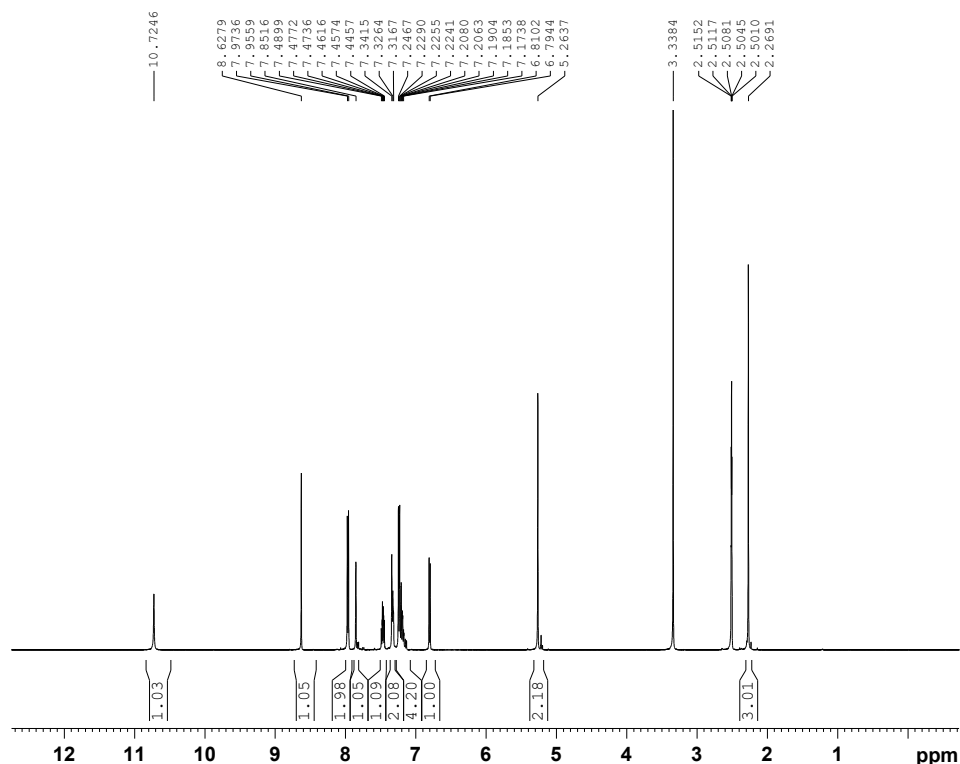

BRUKER  
AVANCE NEO  
500 MHz NMR  
SPECTROMETER  
SAIF, P.U.

Current Data Parameters  
NAME Nov23-2022  
EXPNO 210  
PROCNO 1

F2 - Acquisition Parameters  
Date\_ 20221123  
Time\_ 10.58 h  
INSTRUM Avance Neo 500  
PROBHD Z119470\_0333 (  
PULPROG zg30  
TD 65536  
SOLVENT DMSO  
NS 16  
DS 0  
SWH 14705.883 Hz  
FIDRES 0.448788 Hz  
AQ 2.2282240 sec  
RG 95.7854  
DW 34.000 usec  
DE 6.79 usec  
TE 300.2 K  
D1 1.00000000 sec  
TD0 1  
SFO1 500.1730885 MHz  
NUC1 1H  
P0 3.33  
P1 10.00 usec  
PLW1 20.93000031 W

F2 - Processing parameters  
SI 65536  
SF 500.1700000 MHz  
WDW EM  
SSB 0  
LB 0.30 Hz  
GB 0  
PC 1.00

### 18.4 <sup>13</sup>C NMR OF ISBB-6

ISBB-6  
C13CPD DMSO {D:\Spectra} nmr 21

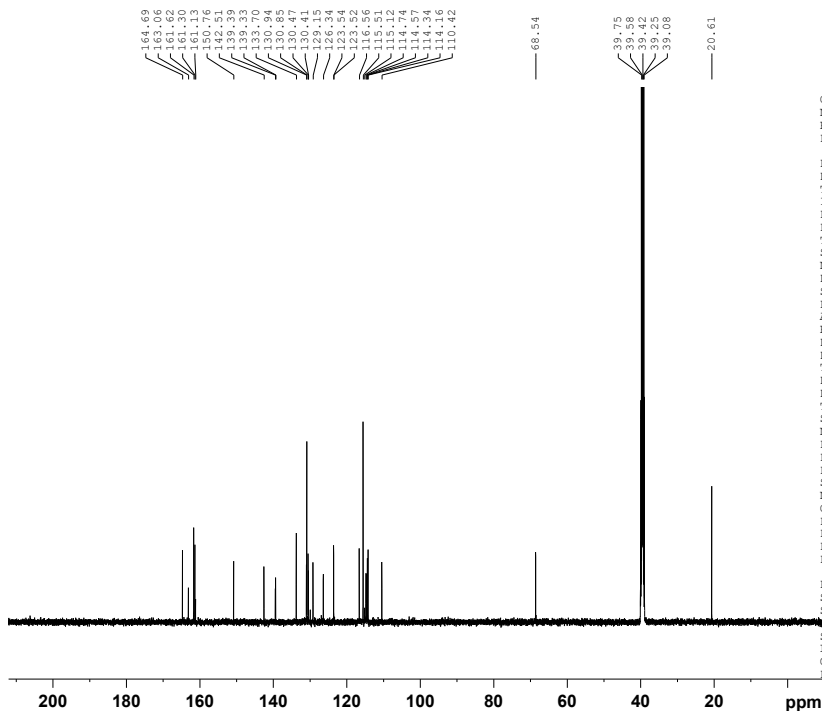

BRUKER  
AVANCE NEO  
500 MHz NMR SPECTROMETER  
SAIF, PANJAB UNIVERSITY,  
CHANDIGARH

Current Data Parameters  
NAME Nov23-2022  
EXPNO 211  
PROCNO 1

F2 - Acquisition Parameters  
Date\_ 20221123  
Time\_ 23.58 h  
INSTRUM Avance Neo 500  
PROBHD Z119470\_0333 (  
PULPROG zgpg30  
TD 65536  
SOLVENT DMSO  
NS 512  
DS 4  
SWH 37037.035 Hz  
FIDRES 1.130281 Hz  
AQ 0.8847360 sec  
RG 101  
DW 13.500 usec  
DE 6.50 usec  
TE 300.2 K  
D1 2.00000000 sec  
D11 0.03000000 sec  
TD0 1  
SFO1 125.7804233 MHz  
NUC1 13C  
P0 3.33 usec  
P1 10.00 usec  
PLW1 83.14009884 W  
SFO2 500.1720007 MHz  
NUC2 1H  
CPDPRG[2] waltz65  
PCPD2 80.00 usec  
PLW2 20.93000031 W  
PLW12 0.32703000 W  
PLW13 0.16449000 W

F2 - Processing parameters  
SI 32768  
SF 125.7679206 MHz  
WDW EM  
SSB 0  
LB 1.00 Hz  
GB 0  
PC 1.40

## 18.5 MASS SPECTRUM OF ISBB-6

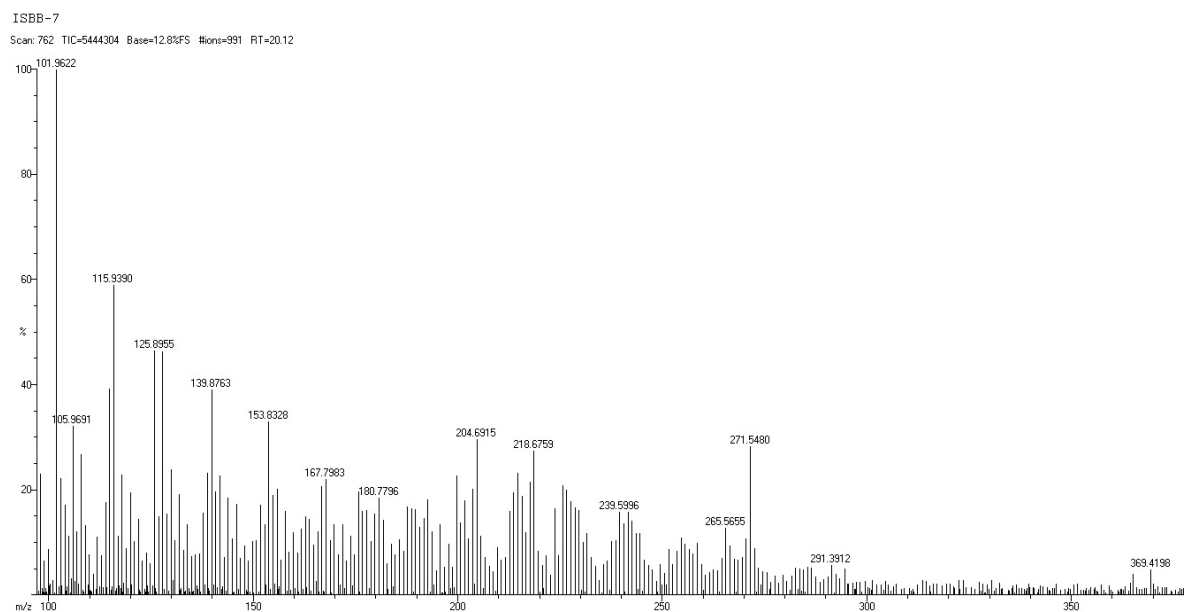

## 18.6 SPECTRAL INTERPRETATION:

*3-((3-(benzyloxy)benzylidene)hydrazineylidene)-5-methylindolin-2-one (ISBB6)*: orange solid, 81%, melting point.  $238 \pm 2^\circ\text{C}$ .  $^1\text{H}$  NMR (500 MHz, DMSO- $d_6$ )  $\delta$ : 10.72 (s, 1H, NH), 8.62 (s, 1H, =CH-), 7.97-6.79(m, 12H, ArH), 5.26 (s, 2H, -CH<sub>2</sub>-), 2.26 (s, 3H, -CH<sub>2</sub>-Ar).  $^{13}\text{C}$  NMR (500 MHz, DMSO- $d_6$ ) 164.69, 163.06, 161.62, 150.76, 142.61, 139.39, 133.70, 130.70, 129.15, 126.34, 123.54, 116.86, 115.12, 114.57, 110.42, 68.54, 20.61. Chemical formula C<sub>23</sub>H<sub>19</sub>N<sub>3</sub>O<sub>2</sub> EI- HRMS (m/z): Calculated-369.4198, Observed- 369.4158.
